# Supplementary material
Source: publisher site journal article supplement (https://www.dovepress.com/article/589613)
Supplement: Supplementary file 1 [file 589613_Supplementary%20Materials_1.pdf]

**Supplementary Table S1: Genome-wide significant independent SNPs for educational attainment**

| <b>SNP</b> | <b>effect</b> | <b>alle</b> | <b>other</b> | <b>alle</b> | <b>eaf</b> | <b>beta</b> | <b>se</b> | <b>pval</b> |
|------------|---------------|-------------|--------------|-------------|------------|-------------|-----------|-------------|
| rs13090388 | C             |             | T            |             | 6.91E-01   | -2.85E-02   | 1.84E-03  | 4.29E-54    |
| rs7029718  | G             |             | A            |             | 5.65E-01   | -2.44E-02   | 1.74E-03  | 1.85E-44    |
| rs9372625  | A             |             | G            |             | 4.13E-01   | 2.38E-02    | 1.76E-03  | 6.76E-42    |
| rs1334297  | A             |             | G            |             | 7.84E-01   | 2.45E-02    | 1.92E-03  | 3.06E-37    |
| rs4700393  | G             |             | A            |             | 5.29E-01   | 2.09E-02    | 1.70E-03  | 1.51E-34    |
| rs11123818 | G             |             | A            |             | 6.05E-01   | -2.08E-02   | 1.75E-03  | 1.72E-32    |
| rs34316    | C             |             | A            |             | 5.80E-01   | -2.02E-02   | 1.77E-03  | 3.35E-30    |
| rs10773002 | T             |             | A            |             | 7.21E-01   | -2.19E-02   | 1.97E-03  | 8.68E-29    |
| rs9964724  | C             |             | T            |             | 3.40E-01   | -1.98E-02   | 1.83E-03  | 2.66E-27    |
| rs3747631  | G             |             | C            |             | 7.72E-01   | -2.21E-02   | 2.08E-03  | 2.97E-26    |
| rs1620977  | G             |             | A            |             | 6.91E-01   | -2.05E-02   | 1.95E-03  | 1.14E-25    |
| rs2819336  | T             |             | C            |             | 3.38E-01   | 1.83E-02    | 1.77E-03  | 5.46E-25    |
| rs11678980 | G             |             | A            |             | 5.54E-01   | 1.74E-02    | 1.72E-03  | 4.29E-24    |
| rs10189857 | G             |             | A            |             | 4.18E-01   | -1.73E-02   | 1.71E-03  | 6.70E-24    |
| rs1008078  | T             |             | C            |             | 4.10E-01   | -1.74E-02   | 1.73E-03  | 1.20E-23    |
| rs73344830 | G             |             | A            |             | 6.02E-01   | -1.72E-02   | 1.72E-03  | 1.95E-23    |
| rs4787457  | G             |             | A            |             | 3.15E-01   | -1.74E-02   | 1.76E-03  | 3.73E-23    |
| rs1689510  | G             |             | C            |             | 6.57E-01   | -1.76E-02   | 1.80E-03  | 1.40E-22    |
| rs1566085  | T             |             | G            |             | 5.70E-01   | 1.65E-02    | 1.71E-03  | 6.90E-22    |
| rs10963297 | G             |             | C            |             | 2.52E-01   | 1.90E-02    | 1.98E-03  | 7.36E-22    |
| rs1455350  | T             |             | A            |             | 5.29E-01   | 1.61E-02    | 1.70E-03  | 2.61E-21    |
| rs13428598 | T             |             | C            |             | 3.79E-01   | 1.65E-02    | 1.75E-03  | 3.90E-21    |
| rs1391438  | T             |             | C            |             | 3.15E-01   | 1.67E-02    | 1.83E-03  | 5.79E-20    |
| rs79265434 | A             |             | G            |             | 8.83E-01   | -2.33E-02   | 2.62E-03  | 6.08E-19    |
| rs4382592  | T             |             | G            |             | 3.01E-01   | -1.64E-02   | 1.85E-03  | 1.01E-18    |
| rs7924036  | T             |             | G            |             | 5.39E-01   | 1.50E-02    | 1.70E-03  | 1.07E-18    |
| rs176218   | G             |             | T            |             | 7.99E-01   | -1.88E-02   | 2.15E-03  | 1.85E-18    |
| rs9616906  | G             |             | A            |             | 5.77E-01   | -1.50E-02   | 1.72E-03  | 2.92E-18    |
| rs6557171  | C             |             | T            |             | 7.25E-01   | 1.57E-02    | 1.81E-03  | 4.15E-18    |
| rs66568921 | G             |             | T            |             | 3.64E-01   | 1.57E-02    | 1.82E-03  | 7.49E-18    |
| rs74998289 | T             |             | G            |             | 7.60E-01   | 1.82E-02    | 2.13E-03  | 1.31E-17    |
| rs35417702 | C             |             | T            |             | 4.24E-01   | 1.45E-02    | 1.70E-03  | 1.93E-17    |
| rs1618725  | T             |             | C            |             | 5.20E-01   | 1.48E-02    | 1.74E-03  | 2.22E-17    |
| rs11601122 | G             |             | A            |             | 1.50E-01   | -1.95E-02   | 2.30E-03  | 2.24E-17    |
| rs10765775 | A             |             | G            |             | 3.96E-01   | 1.49E-02    | 1.76E-03  | 2.62E-17    |
| rs12375949 | T             |             | C            |             | 4.30E-01   | -1.45E-02   | 1.72E-03  | 3.31E-17    |
| rs12028010 | C             |             | T            |             | 2.23E-01   | -1.70E-02   | 2.02E-03  | 4.51E-17    |
| rs62444881 | C             |             | T            |             | 8.10E-01   | -1.82E-02   | 2.17E-03  | 5.79E-17    |
| rs9349956  | A             |             | C            |             | 7.60E-01   | -1.88E-02   | 2.25E-03  | 6.28E-17    |
| rs3897821  | A             |             | G            |             | 6.50E-01   | 1.50E-02    | 1.80E-03  | 8.25E-17    |
| rs2179152  | C             |             | T            |             | 6.43E-01   | 1.46E-02    | 1.76E-03  | 1.21E-16    |
| rs12643771 | C             |             | T            |             | 6.89E-01   | -1.52E-02   | 1.84E-03  | 1.61E-16    |
| rs55736314 | C             |             | G            |             | 5.83E-01   | -1.43E-02   | 1.74E-03  | 1.63E-16    |
| rs2725370  | T             |             | C            |             | 2.89E-01   | -1.54E-02   | 1.87E-03  | 1.97E-16    |
| rs12468040 | G             |             | T            |             | 6.04E-01   | -1.43E-02   | 1.75E-03  | 2.46E-16    |
| rs72828517 | C             |             | T            |             | 1.41E-01   | 1.84E-02    | 2.24E-03  | 2.83E-16    |
| rs406413   | A             |             | T            |             | 7.89E-01   | 1.70E-02    | 2.09E-03  | 4.84E-16    |
| rs10875121 | G             |             | C            |             | 1.43E-01   | -1.83E-02   | 2.26E-03  | 5.53E-16    |
| rs1964927  | G             |             | A            |             | 6.38E-01   | -1.42E-02   | 1.77E-03  | 9.90E-16    |
| rs8020034  | G             |             | A            |             | 7.94E-01   | -1.78E-02   | 2.23E-03  | 1.17E-15    |
| rs2971970  | T             |             | G            |             | 2.28E-01   | -1.65E-02   | 2.07E-03  | 1.25E-15    |
| rs62184480 | T             |             | C            |             | 2.45E-01   | -1.53E-02   | 1.91E-03  | 1.28E-15    |
| rs56391344 | A             |             | G            |             | 2.38E-01   | 1.57E-02    | 1.97E-03  | 1.34E-15    |
| rs16846463 | A             |             | G            |             | 8.83E-01   | 2.26E-02    | 2.83E-03  | 1.38E-15    |
| rs6493265  | C             |             | T            |             | 6.11E-01   | 1.39E-02    | 1.74E-03  | 1.70E-15    |
| rs363096   | C             |             | T            |             | 5.75E-01   | 1.36E-02    | 1.72E-03  | 2.04E-15    |

|             |   |   |          |           |          |          |
|-------------|---|---|----------|-----------|----------|----------|
| rs13141210  | C | T | 4.92E-01 | -1.36E-02 | 1.72E-03 | 2.26E-15 |
| rs2545798   | T | A | 5.05E-01 | 1.35E-02  | 1.71E-03 | 3.11E-15 |
| rs55771711  | C | G | 2.28E-01 | 1.56E-02  | 1.99E-03 | 5.41E-15 |
| rs2347526   | T | C | 3.62E-01 | -1.40E-02 | 1.79E-03 | 6.84E-15 |
| rs34853711  | C | G | 2.47E-01 | -1.60E-02 | 2.06E-03 | 9.88E-15 |
| rs3026996   | A | C | 7.16E-01 | 1.54E-02  | 1.99E-03 | 1.05E-14 |
| rs35309068  | G | T | 4.66E-01 | 1.32E-02  | 1.71E-03 | 1.15E-14 |
| rs1569092   | A | G | 1.82E-01 | 1.81E-02  | 2.34E-03 | 1.16E-14 |
| rs613872    | G | T | 1.72E-01 | 1.75E-02  | 2.27E-03 | 1.20E-14 |
| rs17489649  | A | G | 6.74E-01 | 1.39E-02  | 1.81E-03 | 1.57E-14 |
| rs4757957   | C | G | 6.51E-01 | 1.41E-02  | 1.84E-03 | 1.81E-14 |
| rs72807818  | G | A | 8.76E-01 | -1.92E-02 | 2.52E-03 | 2.79E-14 |
| rs115000530 | T | A | 6.12E-02 | 2.89E-02  | 3.81E-03 | 3.30E-14 |
| rs10215082  | A | G | 4.39E-01 | -1.30E-02 | 1.72E-03 | 3.33E-14 |
| rs76076331  | C | T | 8.69E-01 | -1.87E-02 | 2.48E-03 | 4.40E-14 |
| rs62097985  | C | T | 5.88E-01 | 1.29E-02  | 1.72E-03 | 6.06E-14 |
| rs2998315   | G | A | 5.78E-01 | 1.27E-02  | 1.71E-03 | 1.12E-13 |
| rs11657342  | A | G | 3.55E-01 | 1.40E-02  | 1.91E-03 | 1.94E-13 |
| rs790647    | C | A | 7.65E-01 | 1.48E-02  | 2.02E-03 | 2.17E-13 |
| rs12134151  | C | G | 5.22E-01 | -1.25E-02 | 1.70E-03 | 2.42E-13 |
| rs36083520  | C | T | 1.67E-01 | 1.63E-02  | 2.23E-03 | 2.60E-13 |
| rs4810227   | A | G | 6.34E-01 | 1.27E-02  | 1.75E-03 | 3.57E-13 |
| rs35475880  | G | T | 8.16E-01 | 1.51E-02  | 2.08E-03 | 3.80E-13 |
| rs4073894   | A | G | 1.77E-01 | 1.52E-02  | 2.11E-03 | 5.40E-13 |
| rs59123361  | A | G | 1.05E-01 | -2.09E-02 | 2.91E-03 | 5.87E-13 |
| rs7863447   | G | A | 1.67E-01 | -1.68E-02 | 2.33E-03 | 5.91E-13 |
| rs4726070   | G | A | 3.79E-01 | -1.25E-02 | 1.74E-03 | 5.95E-13 |
| rs17425572  | G | A | 5.43E-01 | -1.22E-02 | 1.70E-03 | 6.89E-13 |
| rs79269403  | G | A | 7.77E-01 | -1.45E-02 | 2.04E-03 | 1.17E-12 |
| rs2067854   | A | G | 1.82E-01 | 1.48E-02  | 2.09E-03 | 1.38E-12 |
| rs320693    | C | G | 4.73E-01 | 1.20E-02  | 1.70E-03 | 1.58E-12 |
| rs13422673  | C | T | 5.15E-01 | 1.20E-02  | 1.70E-03 | 1.74E-12 |
| rs17598675  | C | T | 5.19E-01 | 1.20E-02  | 1.70E-03 | 1.75E-12 |
| rs11081529  | T | C | 7.43E-01 | 1.31E-02  | 1.86E-03 | 1.82E-12 |
| rs11871429  | A | G | 7.96E-01 | 1.43E-02  | 2.02E-03 | 1.92E-12 |
| rs1584469   | T | C | 3.11E-01 | -1.30E-02 | 1.85E-03 | 2.10E-12 |
| rs35532491  | T | A | 1.07E-01 | 2.01E-02  | 2.86E-03 | 2.42E-12 |
| rs17563464  | A | C | 2.04E-01 | -1.48E-02 | 2.12E-03 | 2.89E-12 |
| rs77702622  | A | G | 7.65E-02 | -2.45E-02 | 3.51E-03 | 2.99E-12 |
| rs2570497   | C | T | 3.27E-01 | 1.23E-02  | 1.77E-03 | 3.03E-12 |
| rs6805241   | C | T | 1.97E-01 | -1.41E-02 | 2.03E-03 | 3.09E-12 |
| rs969512    | T | A | 2.96E-01 | 1.25E-02  | 1.79E-03 | 3.22E-12 |
| rs6731373   | G | A | 6.63E-01 | 1.26E-02  | 1.81E-03 | 3.47E-12 |
| rs11635092  | A | G | 3.64E-01 | -1.23E-02 | 1.77E-03 | 3.89E-12 |
| rs6867851   | C | G | 4.24E-01 | -1.20E-02 | 1.73E-03 | 3.97E-12 |
| rs7920624   | T | A | 4.93E-01 | -1.18E-02 | 1.70E-03 | 3.97E-12 |
| rs1051474   | T | C | 7.26E-01 | -1.30E-02 | 1.88E-03 | 4.86E-12 |
| rs575113    | A | G | 2.77E-01 | 1.29E-02  | 1.86E-03 | 5.30E-12 |
| rs4352658   | T | C | 9.01E-02 | -2.12E-02 | 3.08E-03 | 5.55E-12 |
| rs9936270   | T | C | 3.08E-01 | -1.36E-02 | 1.98E-03 | 6.43E-12 |
| rs9882532   | C | T | 3.64E-01 | -1.21E-02 | 1.77E-03 | 8.17E-12 |
| rs76878669  | C | G | 7.47E-01 | 1.40E-02  | 2.05E-03 | 8.67E-12 |
| rs113520408 | A | G | 2.86E-01 | 1.30E-02  | 1.92E-03 | 1.02E-11 |
| rs1882273   | G | C | 6.53E-01 | 1.23E-02  | 1.81E-03 | 1.09E-11 |
| rs175325    | A | T | 5.82E-01 | -1.18E-02 | 1.74E-03 | 1.11E-11 |
| rs35039375  | G | A | 9.35E-02 | -1.98E-02 | 2.93E-03 | 1.22E-11 |
| rs301800    | T | C | 1.80E-01 | 1.52E-02  | 2.24E-03 | 1.33E-11 |
| rs10862376  | T | A | 8.64E-01 | -1.62E-02 | 2.39E-03 | 1.40E-11 |

|             |   |   |          |           |          |          |
|-------------|---|---|----------|-----------|----------|----------|
| rs2287838   | A | G | 5.34E-01 | -1.15E-02 | 1.71E-03 | 1.53E-11 |
| rs401687    | G | C | 5.44E-01 | -1.14E-02 | 1.70E-03 | 1.86E-11 |
| rs1106090   | A | G | 6.26E-01 | 1.17E-02  | 1.75E-03 | 2.09E-11 |
| rs7977614   | G | A | 3.08E-01 | 1.33E-02  | 1.98E-03 | 2.09E-11 |
| rs12602286  | T | G | 8.86E-01 | 1.70E-02  | 2.55E-03 | 2.37E-11 |
| rs16995054  | C | T | 7.99E-01 | 1.39E-02  | 2.08E-03 | 2.52E-11 |
| rs17565975  | A | G | 5.31E-01 | -1.14E-02 | 1.71E-03 | 2.56E-11 |
| rs3788556   | T | C | 4.59E-01 | 1.14E-02  | 1.71E-03 | 2.78E-11 |
| rs7993663   | T | C | 6.43E-01 | -1.18E-02 | 1.78E-03 | 3.25E-11 |
| rs17048855  | A | G | 3.25E-01 | 1.18E-02  | 1.79E-03 | 3.27E-11 |
| rs10456918  | A | C | 8.18E-01 | -1.49E-02 | 2.24E-03 | 3.67E-11 |
| rs10240905  | T | C | 3.32E-01 | -1.17E-02 | 1.77E-03 | 3.79E-11 |
| rs9938678   | A | T | 7.57E-01 | -1.36E-02 | 2.05E-03 | 4.12E-11 |
| rs1143770   | C | T | 4.08E-01 | -1.14E-02 | 1.72E-03 | 4.31E-11 |
| rs6803651   | G | T | 5.85E-01 | -1.13E-02 | 1.72E-03 | 4.36E-11 |
| rs9933256   | A | G | 5.92E-01 | 1.13E-02  | 1.72E-03 | 4.57E-11 |
| rs11694904  | T | C | 3.38E-01 | 1.22E-02  | 1.85E-03 | 4.78E-11 |
| rs28513670  | G | A | 1.53E-01 | 1.48E-02  | 2.25E-03 | 5.06E-11 |
| rs8008382   | T | C | 3.13E-01 | -1.21E-02 | 1.85E-03 | 6.12E-11 |
| rs7233920   | A | G | 2.16E-01 | -1.32E-02 | 2.02E-03 | 7.13E-11 |
| rs9436866   | C | A | 9.52E-02 | 1.88E-02  | 2.89E-03 | 7.45E-11 |
| rs6123924   | A | G | 8.40E-01 | 1.53E-02  | 2.35E-03 | 7.55E-11 |
| rs17551064  | G | A | 1.60E-01 | -1.49E-02 | 2.30E-03 | 8.62E-11 |
| rs11732657  | A | G | 7.01E-01 | -1.27E-02 | 1.97E-03 | 9.54E-11 |
| rs2923431   | C | G | 6.45E-01 | 1.14E-02  | 1.76E-03 | 9.84E-11 |
| rs2302761   | T | C | 1.91E-01 | 1.35E-02  | 2.09E-03 | 1.00E-10 |
| rs9289300   | T | C | 8.16E-01 | -1.51E-02 | 2.34E-03 | 1.10E-10 |
| rs10073890  | G | A | 7.36E-01 | -1.26E-02 | 1.96E-03 | 1.11E-10 |
| rs2052285   | A | G | 5.77E-01 | 1.12E-02  | 1.75E-03 | 1.34E-10 |
| rs192436652 | C | T | 9.78E-01 | 3.50E-02  | 5.45E-03 | 1.35E-10 |
| rs9342482   | T | G | 2.91E-01 | 1.26E-02  | 1.97E-03 | 1.36E-10 |
| rs837080    | C | T | 4.93E-01 | 1.09E-02  | 1.70E-03 | 1.43E-10 |
| rs2256965   | G | A | 5.43E-01 | -1.13E-02 | 1.76E-03 | 1.59E-10 |
| rs11663602  | A | C | 2.57E-01 | -1.21E-02 | 1.90E-03 | 1.64E-10 |
| rs2447535   | A | G | 2.76E-01 | -1.18E-02 | 1.85E-03 | 1.69E-10 |
| rs4972400   | G | A | 6.48E-01 | -1.16E-02 | 1.81E-03 | 1.70E-10 |
| rs1291818   | C | T | 5.15E-01 | -1.09E-02 | 1.70E-03 | 1.78E-10 |
| rs466047    | A | T | 5.00E-01 | 1.09E-02  | 1.70E-03 | 1.80E-10 |
| rs79523955  | A | G | 9.05E-01 | 1.80E-02  | 2.83E-03 | 1.87E-10 |
| rs6513959   | A | G | 7.21E-01 | 1.18E-02  | 1.85E-03 | 1.88E-10 |
| rs67890737  | C | A | 6.74E-01 | 1.14E-02  | 1.79E-03 | 2.01E-10 |
| rs736282    | C | T | 5.15E-01 | -1.08E-02 | 1.70E-03 | 2.07E-10 |
| rs337637    | G | A | 6.63E-01 | -1.12E-02 | 1.77E-03 | 2.11E-10 |
| rs9529119   | C | G | 1.97E-01 | 1.30E-02  | 2.04E-03 | 2.13E-10 |
| rs10887801  | G | T | 5.63E-01 | -1.09E-02 | 1.71E-03 | 2.27E-10 |
| rs9556958   | C | T | 4.71E-01 | 1.08E-02  | 1.70E-03 | 2.38E-10 |
| rs7803932   | A | G | 1.57E-01 | 1.43E-02  | 2.26E-03 | 2.44E-10 |
| rs77719387  | A | T | 1.70E-02 | -4.60E-02 | 7.26E-03 | 2.46E-10 |
| rs4384309   | G | A | 5.20E-01 | -1.09E-02 | 1.72E-03 | 2.52E-10 |
| rs11023749  | A | G | 6.70E-01 | 1.13E-02  | 1.80E-03 | 2.96E-10 |
| rs1558727   | C | T | 5.15E-01 | 1.07E-02  | 1.70E-03 | 3.09E-10 |
| rs76608582  | C | A | 9.59E-01 | -2.80E-02 | 4.45E-03 | 3.11E-10 |
| rs9503598   | A | G | 4.39E-01 | 1.08E-02  | 1.71E-03 | 3.12E-10 |
| rs12332731  | A | T | 2.02E-01 | 1.37E-02  | 2.18E-03 | 3.12E-10 |
| rs31940     | G | A | 8.66E-01 | -1.55E-02 | 2.46E-03 | 3.24E-10 |
| rs10994777  | G | A | 8.61E-01 | -1.46E-02 | 2.32E-03 | 3.36E-10 |
| rs7796203   | G | A | 4.75E-01 | 1.07E-02  | 1.71E-03 | 3.60E-10 |
| rs7808399   | A | G | 4.52E-01 | -1.07E-02 | 1.71E-03 | 3.78E-10 |

|             |   |   |          |           |          |          |
|-------------|---|---|----------|-----------|----------|----------|
| rs13145650  | C | T | 9.18E-02 | 1.92E-02  | 3.06E-03 | 3.80E-10 |
| rs60483752  | G | C | 4.18E-01 | -1.08E-02 | 1.72E-03 | 3.89E-10 |
| rs4839155   | T | G | 7.50E-01 | 1.25E-02  | 2.00E-03 | 3.94E-10 |
| rs1827540   | G | A | 4.66E-01 | -1.06E-02 | 1.70E-03 | 4.50E-10 |
| rs13010566  | A | C | 4.39E-01 | -1.06E-02 | 1.70E-03 | 4.59E-10 |
| rs36119825  | G | A | 5.31E-01 | -1.06E-02 | 1.71E-03 | 4.82E-10 |
| rs2478208   | C | G | 5.00E-01 | -1.06E-02 | 1.70E-03 | 4.82E-10 |
| rs10460095  | G | A | 4.13E-01 | 1.07E-02  | 1.71E-03 | 4.87E-10 |
| rs34485537  | T | C | 3.90E-01 | 1.08E-02  | 1.73E-03 | 5.67E-10 |
| rs73301698  | A | G | 2.26E-01 | -1.29E-02 | 2.08E-03 | 5.81E-10 |
| rs892612    | C | A | 8.42E-01 | 1.46E-02  | 2.37E-03 | 6.63E-10 |
| rs10940921  | G | T | 5.70E-01 | -1.09E-02 | 1.77E-03 | 7.00E-10 |
| rs13029509  | A | G | 4.68E-01 | -1.05E-02 | 1.70E-03 | 7.17E-10 |
| rs10205801  | A | G | 5.07E-01 | -1.05E-02 | 1.71E-03 | 7.17E-10 |
| rs17126938  | T | C | 8.79E-01 | -1.54E-02 | 2.50E-03 | 8.14E-10 |
| rs112806496 | G | C | 8.50E-02 | 1.87E-02  | 3.05E-03 | 8.28E-10 |
| rs12574281  | A | C | 6.00E-01 | -1.08E-02 | 1.76E-03 | 8.85E-10 |
| rs9914918   | G | A | 7.18E-01 | -1.16E-02 | 1.89E-03 | 8.90E-10 |
| rs7603132   | G | A | 8.45E-01 | -1.32E-02 | 2.15E-03 | 9.17E-10 |
| rs2820314   | A | C | 6.84E-01 | 1.10E-02  | 1.80E-03 | 9.34E-10 |
| rs4328757   | T | C | 6.51E-01 | 1.07E-02  | 1.74E-03 | 9.39E-10 |
| rs3800546   | G | C | 2.70E-01 | -1.18E-02 | 1.94E-03 | 9.73E-10 |
| rs1363862   | G | A | 7.40E-01 | 1.17E-02  | 1.92E-03 | 1.02E-09 |
| rs11222609  | G | A | 3.35E-01 | -1.08E-02 | 1.78E-03 | 1.05E-09 |
| rs28373063  | G | C | 7.93E-01 | -1.39E-02 | 2.29E-03 | 1.23E-09 |
| rs7257460   | T | C | 7.30E-01 | 1.15E-02  | 1.89E-03 | 1.25E-09 |
| rs7332724   | T | C | 2.62E-01 | -1.15E-02 | 1.89E-03 | 1.26E-09 |
| rs7031698   | C | T | 7.76E-01 | 1.25E-02  | 2.06E-03 | 1.26E-09 |
| rs9679654   | T | C | 5.15E-01 | -1.04E-02 | 1.72E-03 | 1.29E-09 |
| rs1582173   | C | T | 2.60E-01 | -1.19E-02 | 1.96E-03 | 1.33E-09 |
| rs77025239  | A | G | 1.09E-01 | -1.42E-02 | 2.34E-03 | 1.33E-09 |
| rs62103084  | T | C | 1.43E-01 | 1.69E-02  | 2.80E-03 | 1.42E-09 |
| rs67885444  | T | C | 1.72E-01 | 1.41E-02  | 2.32E-03 | 1.48E-09 |
| rs6122735   | T | C | 4.13E-01 | 1.05E-02  | 1.74E-03 | 1.49E-09 |
| rs4442732   | G | A | 5.97E-01 | -1.06E-02 | 1.76E-03 | 1.49E-09 |
| rs10772644  | G | C | 1.07E-01 | -1.61E-02 | 2.67E-03 | 1.50E-09 |
| rs35316276  | C | T | 7.06E-01 | -1.17E-02 | 1.94E-03 | 1.52E-09 |
| rs12519073  | C | T | 7.62E-01 | 1.22E-02  | 2.02E-03 | 1.60E-09 |
| rs9704097   | A | C | 4.73E-01 | -1.03E-02 | 1.71E-03 | 1.61E-09 |
| rs60904894  | A | C | 5.00E-01 | -1.03E-02 | 1.70E-03 | 1.62E-09 |
| rs62183776  | T | C | 1.91E-01 | -1.31E-02 | 2.17E-03 | 1.65E-09 |
| rs1105307   | A | G | 2.45E-01 | -1.17E-02 | 1.95E-03 | 1.67E-09 |
| rs6959891   | G | A | 2.96E-01 | -1.14E-02 | 1.89E-03 | 1.74E-09 |
| rs74643044  | T | C | 9.73E-01 | -2.32E-02 | 3.86E-03 | 1.80E-09 |
| rs2885198   | A | G | 4.98E-01 | 1.03E-02  | 1.70E-03 | 1.81E-09 |
| rs80171383  | A | G | 1.24E-01 | 1.45E-02  | 2.41E-03 | 1.83E-09 |
| rs1671770   | C | A | 8.06E-01 | -1.34E-02 | 2.23E-03 | 1.91E-09 |
| rs62157915  | T | C | 9.40E-01 | -2.09E-02 | 3.48E-03 | 1.96E-09 |
| rs242093    | A | G | 5.48E-01 | -1.03E-02 | 1.72E-03 | 2.07E-09 |
| rs10760023  | C | G | 6.68E-01 | -1.10E-02 | 1.83E-03 | 2.12E-09 |
| rs12503522  | C | T | 7.52E-01 | 1.13E-02  | 1.88E-03 | 2.24E-09 |
| rs4846724   | G | A | 5.09E-01 | -1.02E-02 | 1.70E-03 | 2.26E-09 |
| rs78721320  | G | A | 7.96E-01 | -1.31E-02 | 2.19E-03 | 2.28E-09 |
| rs6731967   | C | G | 2.09E-01 | -1.19E-02 | 1.99E-03 | 2.36E-09 |
| rs4778058   | C | T | 5.22E-01 | 1.02E-02  | 1.70E-03 | 2.40E-09 |
| rs11772580  | G | T | 7.47E-01 | 1.20E-02  | 2.01E-03 | 2.57E-09 |
| rs510706    | G | C | 3.84E-01 | -1.07E-02 | 1.80E-03 | 2.73E-09 |
| rs894067    | G | A | 6.07E-01 | -1.04E-02 | 1.75E-03 | 2.74E-09 |

|             |   |   |          |           |          |          |
|-------------|---|---|----------|-----------|----------|----------|
| rs3890802   | A | G | 2.69E-01 | -1.13E-02 | 1.91E-03 | 2.74E-09 |
| rs115454970 | T | G | 3.04E-01 | -1.19E-02 | 1.99E-03 | 2.76E-09 |
| rs4984541   | A | G | 7.59E-01 | -1.23E-02 | 2.07E-03 | 2.77E-09 |
| rs117799466 | G | C | 6.22E-01 | -1.17E-02 | 1.98E-03 | 2.91E-09 |
| rs3013014   | G | A | 3.90E-01 | 1.02E-02  | 1.72E-03 | 2.92E-09 |
| rs710629    | A | G | 6.57E-01 | 1.05E-02  | 1.77E-03 | 2.96E-09 |
| rs730384    | G | A | 5.44E-01 | -1.02E-02 | 1.71E-03 | 3.01E-09 |
| rs71646142  | C | T | 8.27E-01 | -1.29E-02 | 2.17E-03 | 3.11E-09 |
| rs1427298   | C | T | 5.88E-01 | -1.02E-02 | 1.72E-03 | 3.28E-09 |
| rs4964046   | G | A | 3.35E-01 | 1.05E-02  | 1.78E-03 | 3.36E-09 |
| rs117468730 | G | A | 9.88E-01 | 3.52E-02  | 5.97E-03 | 3.79E-09 |
| rs1866823   | A | G | 5.51E-01 | 1.01E-02  | 1.71E-03 | 3.81E-09 |
| rs10856785  | T | C | 7.30E-01 | -1.13E-02 | 1.92E-03 | 3.83E-09 |
| rs113615161 | T | C | 1.40E-01 | -1.47E-02 | 2.50E-03 | 3.97E-09 |
| rs2016392   | A | G | 2.30E-01 | -1.22E-02 | 2.07E-03 | 4.35E-09 |
| rs2414072   | A | T | 4.86E-01 | -1.01E-02 | 1.71E-03 | 4.35E-09 |
| rs13130765  | C | G | 4.56E-01 | -1.01E-02 | 1.73E-03 | 4.69E-09 |
| rs17110109  | C | T | 3.78E-01 | 1.02E-02  | 1.75E-03 | 4.71E-09 |
| rs11620355  | G | A | 8.84E-01 | -1.76E-02 | 3.00E-03 | 4.77E-09 |
| rs12647336  | A | G | 8.57E-01 | -1.38E-02 | 2.35E-03 | 4.82E-09 |
| rs111821073 | C | T | 8.37E-01 | -1.39E-02 | 2.37E-03 | 4.85E-09 |
| rs7012546   | C | T | 5.80E-01 | -1.01E-02 | 1.72E-03 | 4.93E-09 |
| rs1925576   | A | G | 5.58E-01 | -9.97E-03 | 1.71E-03 | 4.94E-09 |
| rs7833201   | C | G | 1.34E-01 | -1.53E-02 | 2.62E-03 | 5.05E-09 |
| rs6938002   | G | A | 6.04E-01 | 1.01E-02  | 1.73E-03 | 5.41E-09 |
| rs4369924   | A | G | 1.68E-01 | 1.36E-02  | 2.34E-03 | 5.82E-09 |
| rs1592757   | C | G | 3.76E-01 | -1.05E-02 | 1.80E-03 | 5.89E-09 |
| rs12682775  | T | C | 7.86E-01 | -1.19E-02 | 2.04E-03 | 5.99E-09 |
| rs9320493   | G | A | 8.64E-01 | -1.39E-02 | 2.40E-03 | 6.13E-09 |
| rs34394051  | G | A | 1.60E-01 | 1.39E-02  | 2.40E-03 | 6.20E-09 |
| rs1595973   | C | T | 4.41E-01 | 1.00E-02  | 1.73E-03 | 6.56E-09 |
| rs4945424   | A | C | 4.15E-01 | -9.92E-03 | 1.71E-03 | 6.94E-09 |
| rs663234    | G | C | 6.12E-01 | -1.01E-02 | 1.74E-03 | 7.39E-09 |
| rs72840994  | G | T | 1.82E-01 | 1.25E-02  | 2.16E-03 | 7.77E-09 |
| rs59480703  | G | C | 8.37E-01 | 1.24E-02  | 2.15E-03 | 8.32E-09 |
| rs2905426   | G | T | 3.55E-01 | -1.04E-02 | 1.81E-03 | 9.26E-09 |
| rs77128898  | T | C | 2.21E-02 | -2.77E-02 | 4.82E-03 | 9.47E-09 |
| rs152603    | G | A | 3.86E-01 | 1.02E-02  | 1.77E-03 | 9.47E-09 |
| rs532799    | G | A | 6.70E-01 | 1.07E-02  | 1.88E-03 | 1.08E-08 |
| rs3809634   | A | G | 6.65E-01 | -1.06E-02 | 1.85E-03 | 1.09E-08 |
| rs702606    | T | C | 8.30E-01 | 1.43E-02  | 2.50E-03 | 1.12E-08 |
| rs12655753  | A | G | 2.38E-02 | -2.90E-02 | 5.09E-03 | 1.18E-08 |
| rs743316    | T | C | 8.18E-01 | 1.19E-02  | 2.08E-03 | 1.20E-08 |
| rs7543462   | A | G | 4.20E-01 | -9.73E-03 | 1.71E-03 | 1.25E-08 |
| rs72486027  | C | T | 7.21E-01 | 1.12E-02  | 1.97E-03 | 1.25E-08 |
| rs4870482   | G | C | 2.59E-01 | -1.08E-02 | 1.90E-03 | 1.27E-08 |
| rs9386319   | G | A | 4.27E-01 | 9.91E-03  | 1.74E-03 | 1.27E-08 |
| rs113182709 | G | A | 9.76E-01 | -3.23E-02 | 5.67E-03 | 1.29E-08 |
| rs2182505   | T | C | 2.64E-01 | 1.09E-02  | 1.92E-03 | 1.64E-08 |
| rs818415    | T | G | 8.18E-01 | -1.24E-02 | 2.19E-03 | 1.72E-08 |
| rs225291    | G | A | 8.03E-01 | -1.21E-02 | 2.14E-03 | 1.84E-08 |
| rs622169    | C | T | 5.32E-01 | -9.99E-03 | 1.78E-03 | 1.89E-08 |
| rs9995567   | G | A | 6.17E-01 | -9.98E-03 | 1.78E-03 | 1.93E-08 |
| rs7594904   | C | T | 4.18E-01 | 9.69E-03  | 1.73E-03 | 2.05E-08 |
| rs2283076   | A | G | 7.86E-01 | 1.14E-02  | 2.04E-03 | 2.07E-08 |
| rs7773815   | A | C | 4.85E-01 | -9.53E-03 | 1.70E-03 | 2.08E-08 |
| rs11752914  | T | C | 8.03E-01 | 1.21E-02  | 2.16E-03 | 2.13E-08 |
| rs4895650   | T | C | 5.36E-01 | 9.65E-03  | 1.72E-03 | 2.16E-08 |

|             |   |   |          |           |          |          |
|-------------|---|---|----------|-----------|----------|----------|
| rs62439690  | G | A | 7.33E-01 | 1.09E-02  | 1.94E-03 | 2.18E-08 |
| rs74701752  | G | T | 9.05E-01 | -1.59E-02 | 2.85E-03 | 2.38E-08 |
| rs112687095 | G | A | 8.35E-01 | -1.33E-02 | 2.38E-03 | 2.42E-08 |
| rs1381247   | C | T | 2.91E-01 | -1.01E-02 | 1.82E-03 | 2.46E-08 |
| rs16854920  | T | C | 6.45E-01 | -1.01E-02 | 1.81E-03 | 2.51E-08 |
| rs7928622   | T | A | 3.08E-01 | 1.01E-02  | 1.81E-03 | 2.52E-08 |
| rs1947114   | G | A | 2.55E-01 | 1.07E-02  | 1.92E-03 | 2.64E-08 |
| rs77835879  | A | G | 9.10E-01 | 1.60E-02  | 2.88E-03 | 2.68E-08 |
| rs2554835   | G | A | 6.02E-01 | -9.74E-03 | 1.75E-03 | 2.69E-08 |
| rs277828    | C | A | 7.43E-01 | 1.09E-02  | 1.96E-03 | 2.71E-08 |
| rs11681861  | G | T | 1.57E-01 | -1.44E-02 | 2.59E-03 | 2.88E-08 |
| rs7864396   | C | A | 3.66E-01 | 9.79E-03  | 1.77E-03 | 2.95E-08 |
| rs12804787  | A | G | 9.32E-01 | 1.81E-02  | 3.27E-03 | 2.96E-08 |
| rs795230    | T | C | 4.18E-01 | 9.52E-03  | 1.72E-03 | 2.97E-08 |
| rs73874335  | C | T | 9.40E-01 | 1.99E-02  | 3.61E-03 | 3.40E-08 |
| rs4667029   | G | C | 3.88E-01 | 9.61E-03  | 1.74E-03 | 3.44E-08 |
| rs11627087  | A | G | 9.15E-01 | 1.79E-02  | 3.25E-03 | 3.71E-08 |
| rs12940014  | C | T | 5.20E-01 | 9.36E-03  | 1.70E-03 | 3.73E-08 |
| rs2901616   | A | G | 5.17E-01 | 9.41E-03  | 1.71E-03 | 3.77E-08 |
| rs7650602   | T | C | 5.71E-01 | -9.39E-03 | 1.71E-03 | 4.11E-08 |
| rs4888746   | G | A | 3.78E-01 | -9.52E-03 | 1.74E-03 | 4.15E-08 |
| rs7278859   | A | T | 6.92E-01 | -1.01E-02 | 1.85E-03 | 4.15E-08 |
| rs7315713   | A | T | 3.37E-01 | 1.02E-02  | 1.87E-03 | 4.34E-08 |
| rs4766424   | G | C | 9.12E-01 | -1.41E-02 | 2.58E-03 | 4.43E-08 |
| rs4733264   | C | G | 6.31E-01 | -9.54E-03 | 1.74E-03 | 4.53E-08 |
| rs535307    | A | G | 3.23E-01 | 1.00E-02  | 1.84E-03 | 4.73E-08 |
| rs9384679   | T | C | 4.08E-01 | -9.59E-03 | 1.76E-03 | 4.88E-08 |
| rs1450782   | G | T | 6.02E-01 | -9.45E-03 | 1.73E-03 | 4.93E-08 |
| rs7016302   | G | C | 1.77E-01 | 1.24E-02  | 2.28E-03 | 4.98E-08 |

---

**Supplementary Table S2:** Genome-wide significant independent SNPs for body mass index

| SNP        | effect | alle | other | alle | beta      | se       | pval     |
|------------|--------|------|-------|------|-----------|----------|----------|
| rs10132280 | A      |      | C     |      | -2.23E-02 | 1.80E-03 | 5.60E-35 |
| rs10169594 | T      |      | C     |      | -1.21E-02 | 1.80E-03 | 2.00E-11 |
| rs10182181 | A      |      | G     |      | -3.25E-02 | 1.60E-03 | 6.70E-90 |
| rs10192119 | T      |      | G     |      | -1.66E-02 | 2.20E-03 | 3.00E-14 |
| rs10197031 | T      |      | C     |      | -1.66E-02 | 1.90E-03 | 1.90E-18 |
| rs10247983 | A      |      | G     |      | 2.01E-02  | 3.30E-03 | 1.70E-09 |
| rs10248136 | T      |      | C     |      | -9.70E-03 | 1.70E-03 | 2.00E-08 |
| rs10269783 | A      |      | G     |      | 1.33E-02  | 1.70E-03 | 1.40E-15 |
| rs10478110 | A      |      | C     |      | -1.00E-02 | 1.70E-03 | 9.60E-09 |
| rs1048932  | A      |      | C     |      | -1.60E-02 | 1.70E-03 | 3.80E-22 |
| rs10492229 | T      |      | C     |      | 1.42E-02  | 1.90E-03 | 7.70E-14 |
| rs10510419 | T      |      | G     |      | -1.77E-02 | 2.30E-03 | 2.20E-14 |
| rs10518694 | A      |      | C     |      | 1.46E-02  | 2.50E-03 | 3.30E-09 |
| rs1064213  | A      |      | G     |      | 1.20E-02  | 1.70E-03 | 2.40E-12 |
| rs10733051 | A      |      | G     |      | 9.70E-03  | 1.60E-03 | 2.90E-09 |
| rs10741329 | A      |      | G     |      | 1.10E-02  | 1.90E-03 | 4.00E-09 |
| rs10742752 | T      |      | C     |      | -1.24E-02 | 1.70E-03 | 1.10E-13 |
| rs10747488 | A      |      | C     |      | -1.23E-02 | 2.00E-03 | 1.20E-09 |
| rs1075901  | T      |      | C     |      | -1.21E-02 | 1.60E-03 | 1.20E-13 |
| rs10768994 | T      |      | C     |      | 1.14E-02  | 1.70E-03 | 6.40E-12 |
| rs10795422 | A      |      | G     |      | -1.39E-02 | 1.90E-03 | 9.30E-14 |
| rs10811871 | A      |      | G     |      | 1.08E-02  | 1.80E-03 | 1.60E-09 |
| rs10824218 | A      |      | T     |      | 1.22E-02  | 1.80E-03 | 7.20E-12 |
| rs10824345 | T      |      | C     |      | 1.05E-02  | 1.70E-03 | 9.20E-10 |
| rs10827649 | A      |      | G     |      | -9.40E-03 | 1.60E-03 | 9.10E-09 |
| rs10832778 | C      |      | G     |      | -1.25E-02 | 1.70E-03 | 1.30E-13 |
| rs10842166 | T      |      | C     |      | 1.09E-02  | 2.00E-03 | 4.00E-08 |
| rs10842240 | C      |      | G     |      | 2.18E-02  | 2.70E-03 | 3.10E-16 |
| rs10858334 | C      |      | G     |      | -1.43E-02 | 2.60E-03 | 2.70E-08 |
| rs10867256 | T      |      | C     |      | -1.18E-02 | 1.70E-03 | 8.70E-12 |
| rs10878946 | T      |      | C     |      | -1.41E-02 | 1.90E-03 | 3.60E-13 |
| rs10887578 | C      |      | G     |      | 1.28E-02  | 1.70E-03 | 1.60E-13 |
| rs10915840 | A      |      | G     |      | -1.18E-02 | 1.90E-03 | 1.30E-09 |
| rs10920678 | A      |      | G     |      | 1.55E-02  | 1.60E-03 | 1.50E-21 |
| rs10938397 | A      |      | G     |      | -3.24E-02 | 1.60E-03 | 3.40E-86 |
| rs10942267 | A      |      | G     |      | 1.56E-02  | 1.90E-03 | 3.90E-17 |
| rs10953740 | A      |      | G     |      | 1.53E-02  | 1.70E-03 | 1.00E-18 |
| rs10962550 | C      |      | G     |      | 1.82E-02  | 2.20E-03 | 6.20E-16 |
| rs10968114 | A      |      | C     |      | 1.13E-02  | 1.70E-03 | 6.10E-11 |
| rs10971709 | T      |      | C     |      | 1.32E-02  | 2.10E-03 | 6.20E-10 |
| rs10975933 | C      |      | G     |      | 1.22E-02  | 1.80E-03 | 2.70E-11 |
| rs10984756 | C      |      | G     |      | -1.74E-02 | 2.90E-03 | 1.10E-09 |
| rs11030618 | T      |      | C     |      | 1.10E-02  | 1.70E-03 | 2.40E-10 |
| rs11066188 | A      |      | G     |      | -1.20E-02 | 1.70E-03 | 8.10E-13 |
| rs11084553 | A      |      | G     |      | 2.10E-02  | 2.40E-03 | 1.80E-18 |
| rs11105839 | A      |      | T     |      | -1.09E-02 | 1.70E-03 | 1.10E-10 |
| rs11115176 | T      |      | C     |      | 1.21E-02  | 1.90E-03 | 2.00E-10 |
| rs11118308 | A      |      | G     |      | 1.01E-02  | 1.60E-03 | 4.80E-10 |
| rs11129661 | T      |      | C     |      | 1.24E-02  | 2.10E-03 | 5.40E-09 |
| rs11150911 | A      |      | C     |      | 1.33E-02  | 1.80E-03 | 4.70E-13 |
| rs11165643 | T      |      | C     |      | 2.06E-02  | 1.70E-03 | 1.40E-35 |
| rs11170468 | A      |      | C     |      | 1.23E-02  | 1.90E-03 | 1.90E-10 |
| rs11173522 | A      |      | C     |      | 1.28E-02  | 2.10E-03 | 1.10E-09 |
| rs11185111 | A      |      | G     |      | -1.29E-02 | 1.90E-03 | 7.70E-12 |
| rs11251352 | A      |      | G     |      | -1.09E-02 | 1.80E-03 | 7.00E-10 |
| rs11496125 | T      |      | C     |      | 1.69E-02  | 1.70E-03 | 3.00E-22 |

|            |   |   |           |          |          |
|------------|---|---|-----------|----------|----------|
| rs11505821 | A | T | -3.11E-02 | 3.50E-03 | 2.70E-19 |
| rs1150659  | A | G | -1.39E-02 | 1.90E-03 | 3.80E-13 |
| rs11538    | A | G | -1.35E-02 | 2.30E-03 | 3.30E-09 |
| rs11577094 | T | C | 1.82E-02  | 3.00E-03 | 6.90E-10 |
| rs1158805  | A | C | -1.37E-02 | 1.80E-03 | 1.20E-14 |
| rs11609659 | T | C | 1.54E-02  | 2.00E-03 | 2.20E-14 |
| rs11611246 | T | G | 2.40E-02  | 2.00E-03 | 5.00E-32 |
| rs11614340 | T | C | -1.33E-02 | 1.90E-03 | 8.50E-13 |
| rs11615578 | T | C | 1.30E-02  | 2.00E-03 | 8.10E-11 |
| rs11656076 | A | G | -1.42E-02 | 2.10E-03 | 5.60E-12 |
| rs11672660 | T | C | -3.40E-02 | 2.10E-03 | 1.70E-60 |
| rs11713193 | A | G | 2.39E-02  | 1.70E-03 | 2.40E-44 |
| rs11736228 | A | T | 1.39E-02  | 2.00E-03 | 4.10E-12 |
| rs11738695 | A | C | 9.70E-03  | 1.70E-03 | 2.00E-08 |
| rs11739877 | T | C | 1.17E-02  | 1.80E-03 | 6.60E-11 |
| rs11773362 | T | C | -1.11E-02 | 1.80E-03 | 1.50E-09 |
| rs11781699 | T | C | -1.32E-02 | 2.10E-03 | 3.10E-10 |
| rs11856579 | A | G | -1.41E-02 | 2.00E-03 | 8.00E-13 |
| rs1187352  | T | C | -1.19E-02 | 1.80E-03 | 6.00E-11 |
| rs1188017  | T | C | -1.42E-02 | 2.10E-03 | 1.20E-11 |
| rs11880870 | A | G | 1.89E-02  | 1.70E-03 | 1.00E-28 |
| rs11889536 | A | G | 1.89E-02  | 2.40E-03 | 6.40E-15 |
| rs11904898 | A | G | -1.21E-02 | 2.10E-03 | 3.70E-09 |
| rs11945861 | A | G | -1.48E-02 | 2.00E-03 | 5.00E-13 |
| rs11951673 | T | C | -1.23E-02 | 1.70E-03 | 1.10E-13 |
| rs12033257 | A | G | 1.46E-02  | 1.80E-03 | 2.40E-15 |
| rs12041258 | T | C | 1.46E-02  | 2.00E-03 | 9.50E-13 |
| rs12044597 | A | G | -1.43E-02 | 1.60E-03 | 1.70E-18 |
| rs12049202 | T | C | 2.40E-02  | 2.20E-03 | 1.00E-28 |
| rs12150665 | T | C | 1.62E-02  | 1.70E-03 | 1.60E-22 |
| rs1218822  | A | G | 1.68E-02  | 1.70E-03 | 1.90E-22 |
| rs12299814 | A | C | -1.57E-02 | 2.00E-03 | 5.20E-15 |
| rs12328930 | T | C | -9.80E-03 | 1.70E-03 | 1.80E-08 |
| rs12334877 | A | G | -1.44E-02 | 2.20E-03 | 7.70E-11 |
| rs12364470 | T | G | -1.78E-02 | 2.20E-03 | 1.10E-15 |
| rs12369179 | T | C | -3.59E-02 | 3.10E-03 | 2.50E-31 |
| rs12416812 | A | G | 1.11E-02  | 1.60E-03 | 6.10E-12 |
| rs1241986  | A | G | -1.39E-02 | 2.40E-03 | 1.10E-08 |
| rs12429545 | A | G | 3.16E-02  | 2.50E-03 | 9.60E-38 |
| rs12448257 | A | G | 1.84E-02  | 2.00E-03 | 8.10E-20 |
| rs12495178 | T | C | 1.84E-02  | 1.70E-03 | 7.60E-28 |
| rs12527426 | A | G | 1.35E-02  | 1.90E-03 | 1.40E-12 |
| rs12564992 | A | G | -1.96E-02 | 2.60E-03 | 5.30E-14 |
| rs12593036 | A | G | 1.54E-02  | 1.90E-03 | 3.80E-16 |
| rs12602912 | T | C | 1.76E-02  | 2.10E-03 | 9.90E-18 |
| rs1260326  | T | C | -1.05E-02 | 1.70E-03 | 3.90E-10 |
| rs12629015 | A | G | 1.35E-02  | 2.30E-03 | 2.10E-09 |
| rs12652212 | A | G | -1.23E-02 | 1.70E-03 | 9.70E-14 |
| rs1266874  | A | G | -1.40E-02 | 1.80E-03 | 9.80E-15 |
| rs12675063 | A | T | -1.56E-02 | 2.60E-03 | 1.30E-09 |
| rs1268065  | A | G | -1.02E-02 | 1.70E-03 | 1.00E-09 |
| rs12680842 | A | G | 1.33E-02  | 1.80E-03 | 4.40E-14 |
| rs12718572 | T | C | -1.17E-02 | 1.80E-03 | 3.00E-11 |
| rs12762034 | T | C | -2.40E-02 | 3.20E-03 | 7.30E-14 |
| rs12779328 | T | C | 1.05E-02  | 1.90E-03 | 4.50E-08 |
| rs12881629 | A | G | -2.12E-02 | 3.30E-03 | 1.00E-10 |
| rs12888545 | A | G | -1.36E-02 | 2.00E-03 | 9.10E-12 |
| rs12905439 | C | G | 1.18E-02  | 1.80E-03 | 1.40E-10 |

|            |   |   |           |          |           |
|------------|---|---|-----------|----------|-----------|
| rs12922346 | C | G | 1.36E-02  | 2.00E-03 | 1.00E-11  |
| rs12933482 | A | G | -1.86E-02 | 2.80E-03 | 4.90E-11  |
| rs12936083 | A | G | -1.39E-02 | 1.90E-03 | 4.10E-13  |
| rs12939549 | A | G | 1.80E-02  | 1.60E-03 | 2.70E-28  |
| rs1296328  | A | C | 1.79E-02  | 1.80E-03 | 4.90E-24  |
| rs12964689 | A | G | 2.03E-02  | 1.70E-03 | 5.10E-32  |
| rs12981256 | A | G | 1.42E-02  | 1.80E-03 | 1.10E-15  |
| rs12987009 | A | T | -1.10E-02 | 1.70E-03 | 2.40E-10  |
| rs13021737 | A | G | -5.74E-02 | 2.10E-03 | 7.50E-157 |
| rs1304070  | A | G | 1.26E-02  | 2.00E-03 | 3.70E-10  |
| rs13047416 | C | G | 1.54E-02  | 1.80E-03 | 2.20E-17  |
| rs13069244 | A | G | 1.87E-02  | 3.20E-03 | 3.00E-09  |
| rs13107325 | T | C | 4.70E-02  | 3.20E-03 | 1.10E-47  |
| rs13110266 | A | G | -1.17E-02 | 1.70E-03 | 1.90E-12  |
| rs13147390 | T | C | -1.03E-02 | 1.80E-03 | 1.00E-08  |
| rs13174863 | A | G | -1.92E-02 | 2.30E-03 | 2.90E-16  |
| rs13184896 | T | G | -1.33E-02 | 1.60E-03 | 3.30E-16  |
| rs13191362 | A | G | 2.36E-02  | 2.50E-03 | 5.90E-21  |
| rs1320903  | A | G | 2.16E-02  | 1.80E-03 | 9.20E-32  |
| rs13240600 | A | G | 2.04E-02  | 2.40E-03 | 3.50E-17  |
| rs13250058 | T | G | 1.12E-02  | 1.80E-03 | 2.90E-10  |
| rs13263601 | A | C | -1.54E-02 | 1.80E-03 | 2.20E-17  |
| rs1327259  | A | G | 1.55E-02  | 1.80E-03 | 1.70E-18  |
| rs13287131 | T | C | -1.23E-02 | 2.00E-03 | 6.80E-10  |
| rs13288178 | A | G | 1.40E-02  | 1.80E-03 | 2.70E-15  |
| rs1330052  | C | G | -1.32E-02 | 1.80E-03 | 1.50E-13  |
| rs13329567 | T | C | -2.93E-02 | 2.00E-03 | 1.00E-50  |
| rs1365466  | T | C | -1.37E-02 | 1.90E-03 | 3.30E-13  |
| rs1371108  | A | C | 1.19E-02  | 1.80E-03 | 9.00E-11  |
| rs1372177  | C | G | -9.80E-03 | 1.70E-03 | 1.40E-08  |
| rs138289   | A | T | 1.03E-02  | 1.70E-03 | 3.30E-09  |
| rs1399471  | C | G | -1.31E-02 | 2.00E-03 | 2.70E-11  |
| rs1409818  | T | C | 2.01E-02  | 2.90E-03 | 2.50E-12  |
| rs1412235  | C | G | 2.46E-02  | 1.70E-03 | 6.00E-45  |
| rs1421334  | A | C | 1.25E-02  | 1.80E-03 | 1.00E-12  |
| rs1431659  | A | G | 1.96E-02  | 1.90E-03 | 6.00E-24  |
| rs1436344  | C | G | 1.41E-02  | 1.70E-03 | 4.10E-16  |
| rs1445652  | A | G | 1.23E-02  | 2.20E-03 | 4.30E-08  |
| rs1452075  | T | C | 1.41E-02  | 1.80E-03 | 1.30E-14  |
| rs1454687  | C | G | 2.02E-02  | 1.70E-03 | 5.20E-32  |
| rs1465900  | A | C | 1.25E-02  | 2.00E-03 | 4.80E-10  |
| rs1477199  | A | G | -2.28E-02 | 2.40E-03 | 9.40E-22  |
| rs1477887  | A | G | -1.38E-02 | 1.70E-03 | 2.00E-15  |
| rs1492767  | T | C | 9.40E-03  | 1.60E-03 | 1.00E-08  |
| rs1503526  | T | C | -1.40E-02 | 1.70E-03 | 5.50E-17  |
| rs1521527  | C | G | -1.21E-02 | 1.70E-03 | 3.10E-12  |
| rs1522569  | T | G | 1.64E-02  | 2.20E-03 | 2.90E-13  |
| rs1528435  | T | C | 1.64E-02  | 1.70E-03 | 9.10E-23  |
| rs1535660  | T | C | 1.47E-02  | 2.50E-03 | 5.20E-09  |
| rs156201   | C | G | 1.23E-02  | 2.00E-03 | 5.80E-10  |
| rs1579557  | T | C | 2.13E-02  | 1.90E-03 | 1.10E-29  |
| rs1583123  | A | C | 1.08E-02  | 1.80E-03 | 1.30E-09  |
| rs1624134  | C | G | 1.01E-02  | 1.80E-03 | 1.10E-08  |
| rs1656377  | T | C | -9.90E-03 | 1.70E-03 | 1.60E-08  |
| rs16822990 | A | G | 1.87E-02  | 3.20E-03 | 3.80E-09  |
| rs16849710 | A | G | 1.16E-02  | 1.80E-03 | 6.00E-11  |
| rs16851483 | T | G | 3.69E-02  | 3.50E-03 | 3.20E-26  |
| rs16871902 | A | G | 1.25E-02  | 1.70E-03 | 4.60E-13  |

|            |   |   |           |          |          |
|------------|---|---|-----------|----------|----------|
| rs16889835 | T | C | -1.45E-02 | 2.50E-03 | 4.30E-09 |
| rs16903285 | T | C | -3.31E-02 | 2.60E-03 | 7.60E-38 |
| rs16953563 | A | G | -1.34E-02 | 2.00E-03 | 1.50E-11 |
| rs17001561 | A | G | 1.51E-02  | 2.30E-03 | 3.80E-11 |
| rs17014375 | T | G | -1.72E-02 | 2.50E-03 | 1.10E-11 |
| rs17056301 | T | C | -1.18E-02 | 2.00E-03 | 2.40E-09 |
| rs17066856 | T | C | 3.85E-02  | 2.80E-03 | 1.50E-42 |
| rs17113297 | T | C | 1.66E-02  | 2.10E-03 | 2.10E-15 |
| rs17119937 | T | C | -2.12E-02 | 3.60E-03 | 5.60E-09 |
| rs17203016 | A | G | -1.50E-02 | 2.00E-03 | 2.10E-13 |
| rs17207196 | T | C | -2.21E-02 | 1.80E-03 | 2.10E-35 |
| rs17238110 | A | G | 3.53E-02  | 5.00E-03 | 2.00E-12 |
| rs17311369 | T | C | -1.04E-02 | 1.90E-03 | 3.10E-08 |
| rs17327461 | T | C | 1.25E-02  | 1.60E-03 | 1.50E-14 |
| rs17405819 | T | C | 2.15E-02  | 1.80E-03 | 4.30E-33 |
| rs17424296 | A | G | -1.08E-02 | 1.80E-03 | 2.40E-09 |
| rs17425707 | T | C | -1.67E-02 | 2.80E-03 | 4.40E-09 |
| rs17446257 | A | G | 1.53E-02  | 2.60E-03 | 2.90E-09 |
| rs17499593 | C | G | -1.25E-02 | 2.20E-03 | 1.10E-08 |
| rs17513613 | T | C | -1.86E-02 | 1.80E-03 | 3.60E-26 |
| rs175165   | T | G | 1.03E-02  | 1.80E-03 | 5.20E-09 |
| rs17535082 | T | C | -1.71E-02 | 3.00E-03 | 7.80E-09 |
| rs17535749 | A | G | 1.50E-02  | 2.70E-03 | 2.50E-08 |
| rs17551974 | A | C | -1.41E-02 | 2.20E-03 | 1.90E-10 |
| rs1759975  | A | G | 9.60E-03  | 1.70E-03 | 1.90E-08 |
| rs17636031 | T | C | -1.60E-02 | 1.90E-03 | 1.20E-17 |
| rs17663412 | A | C | 1.57E-02  | 2.70E-03 | 6.10E-09 |
| rs17710386 | T | C | -1.26E-02 | 1.80E-03 | 1.00E-12 |
| rs17724992 | A | G | 1.83E-02  | 1.90E-03 | 1.00E-22 |
| rs17767510 | C | G | 1.29E-02  | 2.30E-03 | 1.90E-08 |
| rs17789218 | T | C | -1.30E-02 | 1.90E-03 | 7.40E-12 |
| rs17806379 | T | C | -2.58E-02 | 2.20E-03 | 1.50E-30 |
| rs1784460  | A | T | 1.32E-02  | 1.80E-03 | 9.00E-14 |
| rs1804528  | A | G | 1.09E-02  | 2.00E-03 | 3.00E-08 |
| rs1814170  | A | T | 2.03E-02  | 2.90E-03 | 2.10E-12 |
| rs1830074  | T | C | -1.15E-02 | 1.90E-03 | 1.40E-09 |
| rs1863652  | A | G | -1.15E-02 | 1.80E-03 | 1.40E-10 |
| rs1884389  | T | C | -1.03E-02 | 1.70E-03 | 4.00E-09 |
| rs1884897  | A | G | -1.94E-02 | 1.70E-03 | 1.30E-30 |
| rs1885728  | A | G | 1.08E-02  | 1.90E-03 | 1.00E-08 |
| rs1891216  | T | G | -1.07E-02 | 1.80E-03 | 2.40E-09 |
| rs1896767  | A | G | -1.09E-02 | 1.70E-03 | 2.40E-10 |
| rs189843   | C | G | -9.80E-03 | 1.70E-03 | 1.70E-08 |
| rs1927790  | T | C | -1.48E-02 | 1.60E-03 | 1.80E-19 |
| rs1928295  | T | C | 1.41E-02  | 1.60E-03 | 5.40E-18 |
| rs1937433  | C | G | -1.24E-02 | 1.70E-03 | 8.50E-13 |
| rs1937684  | A | T | 1.12E-02  | 1.80E-03 | 8.70E-10 |
| rs1948080  | T | G | 1.37E-02  | 1.80E-03 | 1.10E-14 |
| rs1951455  | T | C | -1.45E-02 | 1.90E-03 | 4.50E-14 |
| rs1982441  | T | G | 1.75E-02  | 2.60E-03 | 7.00E-12 |
| rs1982725  | T | C | 9.70E-03  | 1.70E-03 | 3.30E-08 |
| rs1993709  | A | G | -3.31E-02 | 2.10E-03 | 1.90E-57 |
| rs1999494  | A | G | 1.06E-02  | 1.90E-03 | 1.70E-08 |
| rs2007231  | T | C | -1.04E-02 | 1.80E-03 | 5.20E-09 |
| rs200810   | T | C | 1.36E-02  | 1.70E-03 | 5.50E-16 |
| rs2010281  | A | G | -1.61E-02 | 1.70E-03 | 6.70E-21 |
| rs2047648  | A | T | -1.18E-02 | 2.00E-03 | 2.40E-09 |
| rs2051559  | T | C | -1.76E-02 | 2.60E-03 | 5.00E-12 |

|           |   |   |           |          |          |
|-----------|---|---|-----------|----------|----------|
| rs2065418 | T | G | 1.66E-02  | 1.80E-03 | 3.60E-20 |
| rs208015  | T | C | 3.56E-02  | 3.40E-03 | 1.40E-25 |
| rs2124499 | C | G | -1.23E-02 | 1.70E-03 | 3.40E-13 |
| rs2143253 | A | G | -1.88E-02 | 2.60E-03 | 1.10E-12 |
| rs215634  | A | G | 1.52E-02  | 1.80E-03 | 2.60E-17 |
| rs2162524 | T | C | -1.55E-02 | 1.80E-03 | 4.10E-17 |
| rs2163188 | C | G | 1.31E-02  | 1.70E-03 | 2.00E-14 |
| rs2169642 | A | C | -1.22E-02 | 1.80E-03 | 2.90E-11 |
| rs2174307 | C | G | 1.21E-02  | 1.70E-03 | 4.90E-12 |
| rs217671  | A | G | -1.44E-02 | 1.90E-03 | 1.30E-13 |
| rs2192158 | A | G | 1.29E-02  | 1.70E-03 | 8.30E-14 |
| rs2196618 | A | G | -1.47E-02 | 2.00E-03 | 1.30E-13 |
| rs2228213 | A | G | -1.39E-02 | 1.70E-03 | 4.60E-16 |
| rs2228552 | T | G | 1.27E-02  | 1.90E-03 | 3.10E-11 |
| rs2235564 | T | C | 1.31E-02  | 1.80E-03 | 3.70E-13 |
| rs2237403 | T | C | -1.21E-02 | 1.80E-03 | 3.30E-11 |
| rs2242189 | T | C | 1.35E-02  | 1.80E-03 | 8.30E-14 |
| rs2246012 | T | C | -1.58E-02 | 2.20E-03 | 3.10E-13 |
| rs2257791 | A | G | -1.42E-02 | 2.00E-03 | 1.80E-12 |
| rs2271189 | A | G | -1.44E-02 | 1.80E-03 | 5.00E-16 |
| rs2281819 | A | T | -1.60E-02 | 2.00E-03 | 5.10E-15 |
| rs2283093 | T | C | 1.27E-02  | 2.10E-03 | 3.10E-09 |
| rs2284746 | C | G | 1.04E-02  | 1.70E-03 | 1.40E-09 |
| rs2285178 | T | C | -1.12E-02 | 1.90E-03 | 9.40E-09 |
| rs2307111 | T | C | 2.65E-02  | 1.60E-03 | 1.60E-58 |
| rs2357760 | A | G | 1.45E-02  | 1.70E-03 | 6.80E-17 |
| rs2365389 | T | C | -1.74E-02 | 1.70E-03 | 1.30E-25 |
| rs2367112 | T | G | 1.19E-02  | 1.60E-03 | 2.30E-13 |
| rs2423668 | T | C | 1.05E-02  | 1.90E-03 | 2.80E-08 |
| rs2425840 | A | C | -1.19E-02 | 1.80E-03 | 1.60E-11 |
| rs2429150 | A | C | -1.11E-02 | 1.80E-03 | 2.70E-10 |
| rs2479958 | A | G | 1.54E-02  | 1.80E-03 | 1.50E-17 |
| rs2481665 | T | C | 1.61E-02  | 1.60E-03 | 7.20E-23 |
| rs2543132 | C | G | 1.46E-02  | 2.20E-03 | 5.00E-11 |
| rs2600226 | T | C | -1.16E-02 | 1.90E-03 | 3.70E-10 |
| rs2605603 | A | G | -1.03E-02 | 1.60E-03 | 2.50E-10 |
| rs2608703 | A | C | 1.42E-02  | 1.70E-03 | 1.90E-16 |
| rs2612576 | A | T | -1.10E-02 | 1.90E-03 | 9.70E-09 |
| rs262130  | T | C | 1.27E-02  | 2.30E-03 | 1.80E-08 |
| rs2693826 | A | G | -1.37E-02 | 1.70E-03 | 2.00E-15 |
| rs2694047 | A | G | -1.88E-02 | 2.00E-03 | 3.90E-21 |
| rs273504  | A | G | -1.53E-02 | 1.80E-03 | 4.40E-18 |
| rs2744974 | T | C | 2.49E-02  | 1.80E-03 | 1.40E-45 |
| rs2791653 | A | G | 1.41E-02  | 1.90E-03 | 1.30E-13 |
| rs2820311 | A | G | -2.35E-02 | 1.80E-03 | 4.10E-38 |
| rs2832283 | A | G | 1.15E-02  | 2.00E-03 | 5.80E-09 |
| rs28350   | A | G | 1.77E-02  | 2.20E-03 | 3.50E-15 |
| rs2836964 | T | C | 1.10E-02  | 1.80E-03 | 1.30E-09 |
| rs2861683 | A | C | 1.44E-02  | 1.70E-03 | 1.30E-16 |
| rs287104  | A | G | 1.15E-02  | 1.70E-03 | 4.40E-11 |
| rs2875762 | C | G | 1.39E-02  | 2.00E-03 | 1.20E-11 |
| rs2885415 | A | G | -1.58E-02 | 2.00E-03 | 1.40E-15 |
| rs2903971 | T | G | 1.45E-02  | 2.30E-03 | 1.50E-10 |
| rs2907948 | A | G | -1.41E-02 | 1.90E-03 | 1.30E-13 |
| rs2931434 | T | C | -1.04E-02 | 1.80E-03 | 1.40E-08 |
| rs294704  | T | G | -1.13E-02 | 1.90E-03 | 4.00E-09 |
| rs3007105 | T | C | 1.42E-02  | 1.70E-03 | 1.10E-17 |
| rs326889  | T | C | -1.29E-02 | 1.80E-03 | 2.40E-13 |

|           |   |   |           |          |          |
|-----------|---|---|-----------|----------|----------|
| rs329651  | T | G | 1.64E-02  | 2.10E-03 | 9.00E-15 |
| rs331966  | A | C | -1.12E-02 | 1.80E-03 | 3.20E-10 |
| rs339991  | A | G | -1.24E-02 | 1.80E-03 | 1.20E-12 |
| rs349088  | A | C | -1.28E-02 | 1.70E-03 | 1.80E-13 |
| rs355777  | C | G | 1.53E-02  | 1.70E-03 | 1.40E-18 |
| rs3731695 | T | C | -1.16E-02 | 1.60E-03 | 7.90E-13 |
| rs3732084 | T | C | -1.07E-02 | 1.80E-03 | 1.10E-09 |
| rs3736485 | A | G | 1.34E-02  | 1.60E-03 | 2.50E-16 |
| rs3749897 | T | C | 1.22E-02  | 1.80E-03 | 8.40E-12 |
| rs3754963 | A | T | 1.23E-02  | 2.00E-03 | 3.30E-10 |
| rs3764835 | A | G | -1.41E-02 | 2.40E-03 | 3.10E-09 |
| rs3800229 | T | G | 1.75E-02  | 1.80E-03 | 1.40E-22 |
| rs3800637 | T | C | -1.15E-02 | 1.80E-03 | 5.10E-10 |
| rs3803286 | A | G | 1.81E-02  | 1.80E-03 | 4.10E-23 |
| rs3806572 | A | G | -1.45E-02 | 1.90E-03 | 1.60E-14 |
| rs3807645 | A | G | -1.66E-02 | 2.10E-03 | 2.40E-15 |
| rs380857  | A | C | -1.51E-02 | 2.70E-03 | 3.60E-08 |
| rs3814883 | T | C | 2.32E-02  | 1.70E-03 | 1.10E-40 |
| rs3829849 | T | C | 9.80E-03  | 1.70E-03 | 5.90E-09 |
| rs38314   | A | G | -1.20E-02 | 1.70E-03 | 4.70E-12 |
| rs3844598 | A | G | -9.50E-03 | 1.70E-03 | 3.80E-08 |
| rs3902951 | T | G | -1.34E-02 | 2.00E-03 | 7.00E-12 |
| rs3904244 | A | T | 1.55E-02  | 2.50E-03 | 4.30E-10 |
| rs391300  | T | C | 1.19E-02  | 1.70E-03 | 3.10E-12 |
| rs3977755 | T | C | -1.35E-02 | 1.90E-03 | 5.90E-13 |
| rs40067   | A | G | -2.66E-02 | 2.30E-03 | 7.10E-30 |
| rs4012234 | T | G | -1.41E-02 | 1.80E-03 | 9.90E-16 |
| rs4072917 | A | G | 1.15E-02  | 1.80E-03 | 6.90E-11 |
| rs4148155 | A | G | 1.88E-02  | 2.60E-03 | 5.00E-13 |
| rs4148866 | T | C | 9.80E-03  | 1.80E-03 | 4.00E-08 |
| rs4151664 | T | C | 2.00E-02  | 3.50E-03 | 1.40E-08 |
| rs4237643 | T | G | 2.23E-02  | 1.90E-03 | 4.30E-33 |
| rs427943  | A | C | -1.70E-02 | 1.70E-03 | 7.30E-23 |
| rs429343  | A | G | 1.50E-02  | 1.70E-03 | 6.80E-18 |
| rs4307239 | A | G | -1.15E-02 | 1.70E-03 | 3.90E-11 |
| rs4414033 | A | G | 1.29E-02  | 1.80E-03 | 1.40E-12 |
| rs4430672 | T | C | 1.27E-02  | 2.20E-03 | 3.90E-09 |
| rs4482463 | A | C | -3.31E-02 | 3.30E-03 | 2.80E-23 |
| rs4516268 | A | C | -2.17E-02 | 2.10E-03 | 5.20E-25 |
| rs4518345 | A | G | -1.17E-02 | 1.90E-03 | 1.00E-09 |
| rs4556997 | A | C | 1.97E-02  | 2.40E-03 | 6.90E-17 |
| rs4589691 | C | G | -1.41E-02 | 2.40E-03 | 4.70E-09 |
| rs4639527 | A | G | -1.72E-02 | 1.90E-03 | 3.30E-20 |
| rs4653017 | T | C | 1.22E-02  | 1.80E-03 | 4.50E-11 |
| rs4660443 | T | C | 1.64E-02  | 2.10E-03 | 6.80E-15 |
| rs4671328 | T | G | 2.19E-02  | 1.70E-03 | 2.20E-36 |
| rs4713436 | T | C | -1.33E-02 | 2.40E-03 | 1.80E-08 |
| rs4722398 | T | C | 1.58E-02  | 2.50E-03 | 3.60E-10 |
| rs4740619 | T | C | 1.86E-02  | 1.60E-03 | 2.30E-30 |
| rs4757144 | A | G | 1.69E-02  | 1.80E-03 | 5.60E-22 |
| rs4783830 | A | G | -1.05E-02 | 1.90E-03 | 2.40E-08 |
| rs4786903 | A | G | -1.25E-02 | 2.00E-03 | 3.50E-10 |
| rs4800191 | C | G | 1.03E-02  | 1.70E-03 | 2.50E-09 |
| rs4801117 | A | C | 1.04E-02  | 1.80E-03 | 4.60E-09 |
| rs4818225 | A | G | -1.17E-02 | 1.80E-03 | 2.30E-10 |
| rs4820408 | T | G | 1.51E-02  | 1.70E-03 | 2.10E-19 |
| rs4851029 | T | G | -1.21E-02 | 1.70E-03 | 1.70E-12 |
| rs4858193 | T | C | 1.29E-02  | 1.90E-03 | 1.60E-11 |

|           |   |   |           |          |           |
|-----------|---|---|-----------|----------|-----------|
| rs4864201 | T | C | 1.41E-02  | 1.70E-03 | 1.50E-16  |
| rs4880341 | T | C | -1.18E-02 | 1.70E-03 | 1.10E-11  |
| rs4906908 | T | G | -1.03E-02 | 1.70E-03 | 2.50E-09  |
| rs491711  | A | C | 1.15E-02  | 1.90E-03 | 1.10E-09  |
| rs4929923 | T | C | -1.81E-02 | 1.70E-03 | 7.20E-27  |
| rs4936175 | T | C | -1.22E-02 | 1.70E-03 | 1.40E-12  |
| rs4937870 | A | G | 1.09E-02  | 1.90E-03 | 8.80E-09  |
| rs4952843 | A | G | 1.31E-02  | 1.80E-03 | 6.80E-14  |
| rs4954638 | A | C | 1.18E-02  | 2.00E-03 | 2.90E-09  |
| rs4968656 | A | G | -1.16E-02 | 1.90E-03 | 8.20E-10  |
| rs4981693 | A | G | 2.06E-02  | 2.00E-03 | 6.90E-24  |
| rs4986044 | T | C | -1.64E-02 | 1.60E-03 | 3.30E-23  |
| rs538579  | C | G | 1.37E-02  | 1.90E-03 | 1.30E-13  |
| rs543874  | A | G | -4.75E-02 | 2.00E-03 | 1.20E-122 |
| rs559231  | T | G | 1.35E-02  | 1.80E-03 | 2.40E-14  |
| rs577525  | T | C | -1.66E-02 | 1.70E-03 | 9.70E-22  |
| rs592483  | T | C | -1.47E-02 | 1.70E-03 | 2.00E-18  |
| rs6011457 | A | T | -1.16E-02 | 1.70E-03 | 2.70E-11  |
| rs6050446 | A | G | -3.43E-02 | 4.70E-03 | 4.40E-13  |
| rs621042  | A | C | -1.07E-02 | 1.70E-03 | 6.30E-10  |
| rs6235    | C | G | -1.75E-02 | 1.90E-03 | 1.50E-19  |
| rs6265    | T | C | -4.12E-02 | 2.10E-03 | 1.00E-86  |
| rs629443  | T | G | 1.16E-02  | 1.90E-03 | 1.40E-09  |
| rs6443750 | T | C | -1.48E-02 | 2.10E-03 | 3.20E-12  |
| rs6448587 | A | C | 1.67E-02  | 2.30E-03 | 2.30E-13  |
| rs645040  | T | G | 1.71E-02  | 2.00E-03 | 2.50E-18  |
| rs6461115 | A | G | 1.44E-02  | 1.90E-03 | 1.20E-13  |
| rs6471941 | A | G | 1.56E-02  | 2.10E-03 | 3.10E-13  |
| rs6500208 | A | G | 1.40E-02  | 2.00E-03 | 4.10E-12  |
| rs6512302 | C | G | 1.42E-02  | 2.00E-03 | 2.10E-12  |
| rs6545714 | A | G | -1.91E-02 | 1.70E-03 | 9.10E-31  |
| rs6551278 | T | C | -1.81E-02 | 2.20E-03 | 7.20E-16  |
| rs6556301 | T | G | -1.11E-02 | 1.80E-03 | 4.10E-10  |
| rs657452  | A | G | 1.88E-02  | 1.70E-03 | 7.20E-29  |
| rs6587552 | A | G | 1.73E-02  | 2.00E-03 | 1.60E-17  |
| rs6591407 | A | C | -1.18E-02 | 2.10E-03 | 1.90E-08  |
| rs6593688 | A | G | -1.37E-02 | 1.80E-03 | 8.60E-15  |
| rs6595205 | C | G | 1.14E-02  | 1.60E-03 | 2.00E-12  |
| rs663129  | A | G | 5.45E-02  | 1.90E-03 | 1.60E-178 |
| rs6673081 | T | C | 1.00E-02  | 1.80E-03 | 1.80E-08  |
| rs6692586 | A | G | 1.92E-02  | 2.30E-03 | 1.10E-16  |
| rs6712    | C | G | 1.38E-02  | 2.50E-03 | 4.40E-08  |
| rs6734537 | T | C | -1.33E-02 | 2.20E-03 | 1.00E-09  |
| rs6764533 | A | G | 1.16E-02  | 1.80E-03 | 1.40E-10  |
| rs676749  | A | T | -1.04E-02 | 1.70E-03 | 1.70E-09  |
| rs6772756 | A | G | 1.04E-02  | 1.90E-03 | 4.00E-08  |
| rs6781254 | T | C | 1.12E-02  | 1.80E-03 | 4.90E-10  |
| rs6792696 | A | G | 1.04E-02  | 1.70E-03 | 6.60E-10  |
| rs6804842 | A | G | -1.56E-02 | 1.70E-03 | 3.60E-21  |
| rs6812882 | T | C | -1.13E-02 | 1.90E-03 | 2.50E-09  |
| rs6841761 | T | G | -1.31E-02 | 1.60E-03 | 6.40E-16  |
| rs6985109 | A | G | -1.77E-02 | 1.70E-03 | 1.50E-26  |
| rs7024334 | T | G | 1.38E-02  | 2.00E-03 | 3.10E-12  |
| rs7025938 | C | G | -1.66E-02 | 1.90E-03 | 3.70E-19  |
| rs7084454 | A | G | 1.93E-02  | 1.90E-03 | 4.00E-25  |
| rs7102454 | T | C | -1.58E-02 | 1.80E-03 | 2.40E-18  |
| rs7117238 | A | G | -1.31E-02 | 2.20E-03 | 2.50E-09  |
| rs7124681 | A | C | 2.63E-02  | 1.60E-03 | 3.20E-58  |

|           |   |   |           |          |           |
|-----------|---|---|-----------|----------|-----------|
| rs7138803 | A | G | 3.00E-02  | 1.70E-03 | 2.30E-71  |
| rs7144011 | T | G | 2.82E-02  | 2.00E-03 | 5.20E-47  |
| rs7172627 | A | G | -1.17E-02 | 1.70E-03 | 1.10E-11  |
| rs7173441 | A | T | 1.19E-02  | 1.80E-03 | 1.20E-11  |
| rs7181498 | T | C | 1.63E-02  | 1.80E-03 | 1.00E-19  |
| rs7196720 | T | C | 1.29E-02  | 1.70E-03 | 7.30E-14  |
| rs7206608 | C | G | -1.32E-02 | 1.90E-03 | 1.30E-12  |
| rs7206790 | C | G | -6.27E-02 | 1.70E-03 | 1.00E-200 |
| rs7222349 | A | G | 1.15E-02  | 1.80E-03 | 3.30E-10  |
| rs7249149 | A | G | 1.24E-02  | 1.90E-03 | 9.30E-11  |
| rs7313220 | A | G | 1.22E-02  | 1.70E-03 | 1.40E-12  |
| rs7313924 | C | G | 1.01E-02  | 1.80E-03 | 3.50E-08  |
| rs7318817 | T | C | -1.55E-02 | 1.80E-03 | 2.70E-18  |
| rs7334078 | T | C | 1.21E-02  | 1.90E-03 | 2.20E-10  |
| rs7488867 | T | C | -2.04E-02 | 2.00E-03 | 8.40E-24  |
| rs7498665 | A | G | -2.71E-02 | 1.70E-03 | 5.60E-60  |
| rs7503597 | T | G | 1.34E-02  | 1.90E-03 | 2.80E-12  |
| rs7512146 | T | G | -9.40E-03 | 1.70E-03 | 3.90E-08  |
| rs7535528 | A | G | -1.52E-02 | 1.80E-03 | 1.40E-16  |
| rs754635  | C | G | -1.98E-02 | 2.70E-03 | 2.20E-13  |
| rs7550711 | T | C | 6.49E-02  | 5.00E-03 | 3.20E-38  |
| rs7551507 | T | C | -1.84E-02 | 1.60E-03 | 9.30E-30  |
| rs7557796 | T | C | 1.60E-02  | 1.80E-03 | 2.30E-19  |
| rs756717  | A | G | -1.48E-02 | 1.70E-03 | 5.40E-18  |
| rs7568228 | C | G | -1.02E-02 | 1.70E-03 | 2.90E-09  |
| rs7599312 | A | G | -1.86E-02 | 1.90E-03 | 6.90E-24  |
| rs7615297 | C | G | 1.49E-02  | 2.40E-03 | 5.70E-10  |
| rs7626079 | T | C | 1.10E-02  | 1.80E-03 | 1.60E-09  |
| rs7637852 | A | G | 1.39E-02  | 1.90E-03 | 1.70E-13  |
| rs7640424 | T | C | -1.36E-02 | 1.80E-03 | 2.30E-14  |
| rs765875  | T | C | -1.21E-02 | 1.70E-03 | 3.00E-12  |
| rs7683836 | A | G | -1.14E-02 | 1.70E-03 | 6.30E-11  |
| rs7685048 | T | C | -1.01E-02 | 1.70E-03 | 4.10E-09  |
| rs768840  | A | G | 1.14E-02  | 1.80E-03 | 2.00E-10  |
| rs769449  | A | G | -2.54E-02 | 2.70E-03 | 2.30E-20  |
| rs7694732 | A | G | 9.90E-03  | 1.70E-03 | 8.70E-09  |
| rs7703576 | T | C | -1.03E-02 | 1.90E-03 | 4.80E-08  |
| rs7704281 | A | G | 2.71E-02  | 4.10E-03 | 6.50E-11  |
| rs7715256 | T | G | -1.66E-02 | 1.60E-03 | 2.20E-24  |
| rs7724675 | A | G | -1.19E-02 | 2.10E-03 | 9.50E-09  |
| rs7730004 | T | C | 1.48E-02  | 1.80E-03 | 9.10E-16  |
| rs7730898 | A | G | 1.68E-02  | 1.80E-03 | 4.50E-20  |
| rs774246  | A | G | -1.53E-02 | 2.50E-03 | 5.40E-10  |
| rs775724  | A | G | 1.06E-02  | 1.80E-03 | 1.70E-09  |
| rs7761673 | A | T | -1.26E-02 | 2.10E-03 | 1.90E-09  |
| rs7780752 | T | C | -1.39E-02 | 1.80E-03 | 1.00E-14  |
| rs7788008 | A | G | -1.57E-02 | 1.70E-03 | 1.10E-19  |
| rs7819514 | A | G | -1.07E-02 | 1.80E-03 | 5.70E-09  |
| rs7826312 | T | C | -1.04E-02 | 1.70E-03 | 4.90E-10  |
| rs7844647 | T | C | 1.23E-02  | 1.80E-03 | 2.80E-11  |
| rs7869771 | A | C | 1.40E-02  | 1.90E-03 | 4.90E-13  |
| rs7871866 | C | G | 1.87E-02  | 2.40E-03 | 2.30E-14  |
| rs7899106 | A | G | -3.31E-02 | 3.70E-03 | 1.00E-18  |
| rs7903146 | T | C | -1.81E-02 | 1.80E-03 | 1.30E-23  |
| rs7925214 | T | C | 1.47E-02  | 1.80E-03 | 4.40E-17  |
| rs7933205 | A | G | -1.16E-02 | 2.10E-03 | 3.20E-08  |
| rs7941030 | T | C | -1.12E-02 | 1.70E-03 | 2.00E-11  |
| rs7983065 | T | C | -1.48E-02 | 1.70E-03 | 8.90E-18  |

|           |   |   |           |          |          |
|-----------|---|---|-----------|----------|----------|
| rs8027205 | C | G | 1.08E-02  | 1.80E-03 | 1.40E-09 |
| rs8036040 | A | C | 1.09E-02  | 1.70E-03 | 2.70E-10 |
| rs8065336 | T | C | -1.20E-02 | 1.90E-03 | 1.90E-10 |
| rs806600  | A | G | 9.50E-03  | 1.70E-03 | 3.30E-08 |
| rs8071182 | A | G | 1.33E-02  | 2.20E-03 | 2.10E-09 |
| rs8097672 | A | T | -2.00E-02 | 2.50E-03 | 8.40E-16 |
| rs8123881 | A | G | -1.96E-02 | 2.40E-03 | 4.40E-16 |
| rs818524  | T | C | -1.06E-02 | 1.90E-03 | 3.40E-08 |
| rs8192675 | T | C | -1.52E-02 | 1.80E-03 | 1.40E-17 |
| rs825688  | T | C | -9.50E-03 | 1.70E-03 | 4.70E-08 |
| rs845084  | A | G | 1.40E-02  | 2.00E-03 | 1.30E-12 |
| rs852056  | T | C | 1.28E-02  | 2.00E-03 | 1.80E-10 |
| rs865809  | A | G | 1.27E-02  | 2.00E-03 | 5.40E-10 |
| rs872281  | T | C | -1.51E-02 | 2.30E-03 | 4.70E-11 |
| rs876605  | A | G | 1.08E-02  | 2.00E-03 | 3.40E-08 |
| rs879620  | T | C | 2.31E-02  | 1.80E-03 | 5.30E-38 |
| rs889398  | T | C | -1.96E-02 | 1.60E-03 | 1.30E-32 |
| rs895330  | C | G | 2.01E-02  | 2.30E-03 | 5.50E-19 |
| rs901630  | T | C | -1.46E-02 | 1.70E-03 | 1.90E-18 |
| rs902695  | A | G | -1.03E-02 | 1.70E-03 | 2.20E-09 |
| rs9288754 | T | C | -9.60E-03 | 1.70E-03 | 4.10E-08 |
| rs9294260 | A | G | 1.47E-02  | 1.60E-03 | 1.80E-19 |
| rs9300422 | A | G | 1.03E-02  | 1.80E-03 | 4.00E-09 |
| rs930295  | A | C | 2.11E-02  | 2.30E-03 | 1.00E-19 |
| rs9304665 | A | T | 2.29E-02  | 2.00E-03 | 2.90E-29 |
| rs934224  | T | C | 1.07E-02  | 2.00E-03 | 4.70E-08 |
| rs9362662 | A | G | 1.12E-02  | 1.70E-03 | 1.20E-10 |
| rs9367368 | T | C | 1.21E-02  | 1.80E-03 | 1.00E-11 |
| rs9375702 | T | C | -1.15E-02 | 1.90E-03 | 7.90E-10 |
| rs9382285 | A | G | -2.30E-02 | 4.20E-03 | 3.90E-08 |
| rs9408882 | A | G | -9.30E-03 | 1.60E-03 | 1.30E-08 |
| rs9458814 | T | C | -1.15E-02 | 2.00E-03 | 1.80E-08 |
| rs946824  | T | C | 2.06E-02  | 2.60E-03 | 1.10E-15 |
| rs947612  | A | G | -1.16E-02 | 2.00E-03 | 5.60E-09 |
| rs9478496 | T | C | -1.52E-02 | 2.30E-03 | 5.50E-11 |
| rs9522285 | A | G | 1.27E-02  | 1.70E-03 | 2.50E-13 |
| rs9527895 | T | C | -1.65E-02 | 2.30E-03 | 5.40E-13 |
| rs9569777 | T | G | -1.92E-02 | 2.20E-03 | 4.60E-19 |
| rs9599161 | T | C | 1.00E-02  | 1.70E-03 | 1.70E-09 |
| rs9615905 | T | C | 1.10E-02  | 1.70E-03 | 2.70E-10 |
| rs962273  | T | C | -1.37E-02 | 1.90E-03 | 2.60E-13 |
| rs962796  | T | C | 1.48E-02  | 2.20E-03 | 5.90E-12 |
| rs9650755 | A | G | -1.54E-02 | 2.00E-03 | 2.80E-15 |
| rs9688431 | T | C | 2.31E-02  | 3.50E-03 | 2.40E-11 |
| rs977747  | T | G | 1.69E-02  | 1.70E-03 | 1.30E-24 |
| rs9783858 | T | C | 9.10E-03  | 1.70E-03 | 3.30E-08 |
| rs9806742 | A | G | 2.08E-02  | 2.60E-03 | 1.40E-15 |
| rs9816226 | A | T | -3.23E-02 | 2.10E-03 | 1.60E-52 |
| rs9827823 | T | C | 1.93E-02  | 2.40E-03 | 1.20E-15 |
| rs9845966 | T | G | 1.05E-02  | 1.70E-03 | 2.50E-10 |
| rs987237  | A | G | -4.09E-02 | 2.10E-03 | 9.30E-84 |
| rs9926784 | T | C | 2.58E-02  | 2.10E-03 | 9.90E-35 |
| rs9927848 | A | C | -1.22E-02 | 2.00E-03 | 6.40E-10 |
| rs9951619 | T | G | -1.56E-02 | 2.00E-03 | 1.40E-15 |
| rs998732  | A | G | 1.71E-02  | 2.20E-03 | 2.00E-14 |
| rs9989141 | T | C | 1.62E-02  | 1.70E-03 | 3.60E-21 |
| rs999889  | A | G | -1.08E-02 | 1.90E-03 | 1.40E-08 |

---

**Supplementary Table S3:** Genome-wide significant independent SNPs for body fat percentage

| <b>SNP</b> | <b>effect</b> | <b>_alle</b> | <b>other</b> | <b>_alle</b> | <b>eaf</b> | <b>beta</b> | <b>se</b> | <b>pval</b> |
|------------|---------------|--------------|--------------|--------------|------------|-------------|-----------|-------------|
| rs543874   | A             |              | G            |              | 1.92E-01   | 3.15E-02    | 5.80E-03  | 4.53E-08    |
| rs6755502  | T             |              | C            |              | 8.32E-01   | 3.92E-02    | 6.10E-03  | 1.41E-10    |
| rs6738627  | G             |              | A            |              | 3.70E-01   | 3.04E-02    | 5.20E-03  | 5.68E-09    |
| rs2943652  | C             |              | T            |              | 6.40E-01   | -3.35E-02   | 4.70E-03  | 1.53E-12    |
| rs693839   | C             |              | T            |              | 6.80E-01   | -2.83E-02   | 4.90E-03  | 6.56E-09    |
| rs4788099  | A             |              | G            |              | 3.83E-01   | 2.69E-02    | 4.70E-03  | 1.21E-08    |
| rs1558902  | T             |              | A            |              | 4.04E-01   | 5.10E-02    | 4.70E-03  | 3.79E-27    |
| rs9906944  | C             |              | T            |              | 3.28E-01   | -3.33E-02   | 6.00E-03  | 2.86E-08    |
| rs6567160  | T             |              | C            |              | 2.50E-01   | 3.41E-02    | 5.30E-03  | 1.33E-10    |
| rs6857     | C             |              | T            |              | 1.61E-01   | -4.80E-02   | 8.30E-03  | 6.84E-09    |

**Supplementary Table S4:** Genome-wide significant independent SNPs for waist-hip ratio

| <b>SNP</b> | <b>effect</b> | <b>_alle</b> | <b>other</b> | <b>_alle</b> | <b>eaf</b> | <b>beta</b> | <b>se</b> | <b>pval</b> |
|------------|---------------|--------------|--------------|--------------|------------|-------------|-----------|-------------|
| rs12143789 | G             |              | C            |              | 1.58E-01   | 2.40E-02    | 4.20E-03  | 7.60E-09    |
| rs2645294  | C             |              | T            |              | 5.35E-01   | 3.10E-02    | 3.50E-03  | 1.70E-19    |
| rs905938   | T             |              | C            |              | 3.25E-01   | -2.50E-02   | 4.00E-03  | 7.30E-10    |
| rs714515   | G             |              | A            |              | 5.42E-01   | -2.70E-02   | 3.40E-03  | 4.40E-15    |
| rs2820443  | T             |              | C            |              | 3.00E-01   | -3.50E-02   | 3.70E-03  | 5.30E-21    |
| rs1385167  | A             |              | G            |              | 1.42E-01   | 2.90E-02    | 4.90E-03  | 1.80E-09    |
| rs1128249  | G             |              | T            |              | 4.42E-01   | -2.80E-02   | 3.50E-03  | 2.00E-15    |
| rs1569135  | A             |              | G            |              | 4.67E-01   | -2.10E-02   | 3.40E-03  | 5.60E-10    |
| rs17819328 | T             |              | G            |              | 4.50E-01   | 2.10E-02    | 3.50E-03  | 2.40E-09    |
| rs2276824  | C             |              | G            |              | 5.17E-01   | -2.40E-02   | 3.60E-03  | 3.20E-11    |
| rs6772129  | A             |              | G            |              | 2.42E-01   | -3.50E-02   | 3.70E-03  | 3.40E-21    |
| rs10804591 | C             |              | A            |              | 8.50E-01   | 2.40E-02    | 4.20E-03  | 6.60E-09    |
| rs17451107 | T             |              | C            |              | 3.75E-01   | -2.60E-02   | 3.60E-03  | 1.10E-12    |
| rs9991328  | C             |              | T            |              | 4.83E-01   | 1.80E-02    | 3.40E-03  | 4.50E-08    |
| rs303084   | G             |              | A            |              | 7.83E-01   | 2.30E-02    | 4.20E-03  | 3.90E-08    |
| rs459193   | A             |              | G            |              | 7.83E-01   | -2.60E-02   | 3.80E-03  | 1.60E-11    |
| rs7705502  | G             |              | A            |              | 2.92E-01   | 2.70E-02    | 3.60E-03  | 4.70E-14    |
| rs1294410  | T             |              | C            |              | 6.25E-01   | 3.10E-02    | 3.50E-03  | 2.00E-18    |
| rs7759742  | T             |              | A            |              | 5.25E-01   | 2.30E-02    | 3.40E-03  | 4.40E-11    |
| rs998584   | C             |              | A            |              | 4.75E-01   | 4.30E-02    | 3.80E-03  | 1.10E-29    |
| rs1936805  | C             |              | T            |              | 5.50E-01   | 4.20E-02    | 3.40E-03  | 3.60E-35    |
| rs10245353 | C             |              | A            |              | 1.83E-01   | 3.50E-02    | 4.30E-03  | 8.40E-16    |
| rs12679556 | T             |              | G            |              | 2.08E-01   | 2.70E-02    | 4.00E-03  | 2.10E-11    |
| rs10991437 | C             |              | A            |              | 1.00E-01   | 3.10E-02    | 5.40E-03  | 1.00E-08    |
| rs11231693 | G             |              | A            |              | 4.17E-02   | 4.10E-02    | 7.50E-03  | 4.50E-08    |
| rs10842707 | C             |              | T            |              | 1.67E-01   | 3.20E-02    | 4.00E-03  | 4.40E-16    |
| rs2071449  | C             |              | A            |              | 3.25E-01   | 2.80E-02    | 3.60E-03  | 3.00E-14    |
| rs4765219  | C             |              | A            |              | 3.75E-01   | -2.80E-02   | 3.60E-03  | 1.60E-15    |
| rs8042543  | C             |              | T            |              | 1.50E-01   | -2.60E-02   | 4.30E-03  | 1.20E-09    |
| rs8030605  | G             |              | A            |              | 1.58E-01   | 3.00E-02    | 5.30E-03  | 8.80E-09    |
| rs1440372  | T             |              | C            |              | 7.42E-01   | 2.40E-02    | 3.80E-03  | 1.10E-10    |
| rs4646404  | G             |              | A            |              | 3.75E-01   | -2.70E-02   | 3.90E-03  | 1.40E-11    |
| rs12608504 | A             |              | G            |              | 6.58E-01   | -2.20E-02   | 3.60E-03  | 8.80E-10    |
| rs4081724  | G             |              | A            |              | 1.50E-01   | -3.50E-02   | 5.10E-03  | 7.40E-12    |
| rs979012   | T             |              | C            |              | 6.42E-01   | -2.70E-02   | 3.60E-03  | 3.30E-14    |
| rs878639   | A             |              | G            |              | 3.58E-01   | -2.10E-02   | 3.50E-03  | 5.10E-09    |
| rs6090583  | A             |              | G            |              | 5.67E-01   | -2.20E-02   | 3.40E-03  | 6.20E-11    |
| rs2294239  | A             |              | G            |              | 4.50E-01   | -2.50E-02   | 3.50E-03  | 7.20E-13    |

**Supplementary Table S5: Genome-wide significant independent SNPs for smoke**

| <b>SNP</b> | <b>effect</b> | <b>_alle</b> | <b>other</b> | <b>_alle</b> | <b>eaf</b> | <b>beta</b> | <b>se</b> | <b>pval</b> |
|------------|---------------|--------------|--------------|--------------|------------|-------------|-----------|-------------|
| rs2072659  | C             |              | G            |              | 1.05E-01   | -6.53E-02   | 9.25E-03  | 1.71E-12    |
| rs2084533  | C             |              | T            |              | 3.19E-01   | 3.36E-02    | 5.90E-03  | 1.22E-08    |
| rs7431710  | G             |              | A            |              | 6.44E-01   | -3.50E-02   | 5.81E-03  | 1.82E-09    |
| rs11725618 | T             |              | C            |              | 2.87E-01   | 3.61E-02    | 6.16E-03  | 4.67E-09    |
| rs787362   | T             |              | A            |              | 4.52E-01   | 3.05E-02    | 5.57E-03  | 4.50E-08    |
| rs806798   | T             |              | C            |              | 5.43E-01   | -3.09E-02   | 5.53E-03  | 2.48E-08    |
| rs215600   | G             |              | A            |              | 6.40E-01   | -4.93E-02   | 5.75E-03  | 1.10E-17    |
| rs73229090 | C             |              | A            |              | 1.13E-01   | 5.55E-02    | 8.76E-03  | 2.44E-10    |
| rs58379124 | T             |              | C            |              | 7.48E-01   | 6.69E-02    | 6.50E-03  | 9.00E-25    |
| rs790564   | A             |              | C            |              | 7.19E-01   | -4.09E-02   | 6.19E-03  | 3.97E-11    |
| rs3025383  | T             |              | C            |              | 1.80E-01   | -5.78E-02   | 7.05E-03  | 2.22E-16    |
| rs7951365  | T             |              | C            |              | 3.06E-01   | 3.90E-02    | 5.97E-03  | 6.63E-11    |
| rs75494138 | C             |              | T            |              | 6.18E-02   | 5.99E-02    | 1.06E-02  | 1.45E-08    |
| rs7928017  | C             |              | A            |              | 4.13E-01   | -3.29E-02   | 5.56E-03  | 3.14E-09    |
| rs632811   | A             |              | G            |              | 3.51E-01   | -3.67E-02   | 6.41E-03  | 1.03E-08    |
| rs11852372 | A             |              | C            |              | 3.28E-01   | 1.82E-01    | 5.91E-03  | 1.00E-200   |
| rs1579233  | A             |              | G            |              | 5.71E-01   | -3.18E-02   | 5.56E-03  | 1.07E-08    |
| rs4785587  | G             |              | A            |              | 5.11E-01   | -3.36E-02   | 5.53E-03  | 1.27E-09    |
| rs895330   | C             |              | G            |              | 2.06E-01   | -3.90E-02   | 7.02E-03  | 2.68E-08    |
| rs34406232 | C             |              | A            |              | 2.59E-02   | -1.47E-01   | 1.67E-02  | 1.33E-18    |
| rs56113850 | T             |              | C            |              | 5.68E-01   | 1.07E-01    | 5.60E-03  | 1.10E-81    |
| rs2424888  | G             |              | A            |              | 4.05E-01   | 3.35E-02    | 5.64E-03  | 2.76E-09    |
| rs2273500  | T             |              | C            |              | 1.59E-01   | 6.81E-02    | 7.80E-03  | 2.47E-18    |

**Supplementary Table S6:** Genome-wide significant independent SNPs for subjective well-being

| <b>SNP</b> | <b>effect</b> | <b>_alle</b> | <b>other</b> | <b>_alle</b> | <b>eaf</b> | <b>beta</b> | <b>se</b> | <b>pval</b> |
|------------|---------------|--------------|--------------|--------------|------------|-------------|-----------|-------------|
| rs2075677  | A             |              | G            |              | 7.74E-01   | 2.10E-02    | 4.00E-03  | 1.88E-08    |
| rs258677   | T             |              | G            |              | 3.75E-01   | 1.70E-02    | 3.00E-03  | 9.46E-08    |
| rs4842283  | A             |              | C            |              | 9.03E-01   | -2.90E-02   | 6.00E-03  | 1.94E-07    |
| rs6587766  | T             |              | C            |              | 4.10E-02   | 4.70E-02    | 9.00E-03  | 2.52E-07    |
| rs7239776  | A             |              | T            |              | 5.30E-01   | -1.60E-02   | 3.00E-03  | 3.31E-07    |
| rs12143280 | T             |              | C            |              | 9.44E-01   | 3.80E-02    | 8.00E-03  | 6.46E-07    |
| rs17693963 | A             |              | C            |              | 8.97E-01   | -2.60E-02   | 5.00E-03  | 9.25E-07    |
| rs17331012 | A             |              | G            |              | 1.29E-01   | -2.30E-02   | 5.00E-03  | 1.10E-06    |
| rs11612312 | T             |              | C            |              | 8.06E-01   | 1.90E-02    | 4.00E-03  | 1.37E-06    |
| rs4589952  | T             |              | C            |              | 1.55E-01   | -2.10E-02   | 4.00E-03  | 1.55E-06    |
| rs13235506 | T             |              | G            |              | 9.55E-01   | -3.40E-02   | 7.00E-03  | 1.96E-06    |
| rs17005492 | T             |              | C            |              | 7.85E-01   | 1.80E-02    | 4.00E-03  | 2.01E-06    |
| rs10769190 | T             |              | C            |              | 1.98E-01   | 1.80E-02    | 4.00E-03  | 2.19E-06    |
| rs12298541 | A             |              | C            |              | 3.56E-01   | 1.60E-02    | 3.00E-03  | 2.28E-06    |
| rs2017279  | A             |              | G            |              | 6.79E-01   | 1.60E-02    | 3.00E-03  | 3.15E-06    |
| rs11073619 | T             |              | C            |              | 1.05E-01   | 2.50E-02    | 5.00E-03  | 3.42E-06    |
| rs7149000  | A             |              | G            |              | 4.59E-01   | -1.40E-02   | 3.00E-03  | 4.77E-06    |

**Supplementary Table S7: Genome-wide significant independent SNPs for depressive symptoms**

| <b>SNP</b>  | <b>effect</b> | <b>alle</b> | <b>other_alle</b> | <b>eaf</b> | <b>beta</b> | <b>se</b> | <b>pval</b> |
|-------------|---------------|-------------|-------------------|------------|-------------|-----------|-------------|
| rs7973260   | A             |             | G                 | 1.90E-01   | 3.10E-02    | 5.00E-03  | 1.78E-09    |
| rs62100776  | A             |             | T                 | 5.28E-01   | -2.50E-02   | 4.00E-03  | 8.45E-09    |
| rs6992714   | T             |             | C                 | 7.20E-01   | 2.00E-02    | 4.00E-03  | 9.32E-08    |
| rs10233018  | A             |             | G                 | 4.91E-01   | -1.80E-02   | 4.00E-03  | 1.65E-07    |
| rs1690818   | T             |             | C                 | 7.02E-01   | -1.90E-02   | 4.00E-03  | 4.05E-07    |
| rs7074335   | T             |             | C                 | 1.75E-01   | 3.50E-02    | 7.00E-03  | 4.57E-07    |
| rs9845113   | C             |             | G                 | 4.35E-01   | 1.80E-02    | 4.00E-03  | 4.64E-07    |
| rs9427622   | T             |             | C                 | 3.94E-01   | -2.10E-02   | 4.00E-03  | 4.75E-07    |
| rs59659806  | T             |             | C                 | 8.08E-01   | -2.20E-02   | 4.00E-03  | 6.01E-07    |
| rs853679    | A             |             | C                 | 1.27E-01   | -2.30E-02   | 5.00E-03  | 6.62E-07    |
| rs11636582  | T             |             | G                 | 6.16E-02   | -4.20E-02   | 9.00E-03  | 6.98E-07    |
| rs652714    | A             |             | G                 | 1.51E-01   | -2.30E-02   | 5.00E-03  | 8.95E-07    |
| rs4810896   | A             |             | C                 | 3.56E-01   | -1.70E-02   | 3.00E-03  | 9.00E-07    |
| rs4942916   | T             |             | C                 | 6.87E-01   | -2.20E-02   | 5.00E-03  | 9.97E-07    |
| rs6458013   | T             |             | C                 | 6.81E-01   | 2.30E-02    | 5.00E-03  | 1.02E-06    |
| rs782212    | T             |             | C                 | 3.64E-01   | -1.80E-02   | 4.00E-03  | 1.23E-06    |
| rs3783005   | A             |             | T                 | 7.20E-01   | 2.10E-02    | 4.00E-03  | 1.33E-06    |
| rs1877075   | A             |             | G                 | 3.23E-01   | -2.20E-02   | 5.00E-03  | 2.00E-06    |
| rs1961982   | A             |             | G                 | 3.32E-01   | -2.20E-02   | 5.00E-03  | 2.25E-06    |
| rs2017122   | T             |             | C                 | 7.09E-02   | 3.30E-02    | 7.00E-03  | 2.32E-06    |
| rs139560451 | T             |             | C                 | 2.61E-02   | -5.90E-02   | 1.30E-02  | 2.88E-06    |
| rs72939513  | A             |             | G                 | 5.60E-02   | -4.40E-02   | 9.00E-03  | 3.14E-06    |
| rs11587416  | T             |             | C                 | 2.33E-01   | -2.60E-02   | 6.00E-03  | 3.46E-06    |
| rs148701159 | A             |             | G                 | 9.18E-01   | 3.50E-02    | 8.00E-03  | 3.74E-06    |
| rs77508728  | T             |             | C                 | 2.24E-02   | 5.50E-02    | 1.20E-02  | 4.91E-06    |

**Supplementary Table S8: Genome-wide significant independent SNPs for major depression**

| <b>SNP</b>  | <b>effect</b> | <b>alle</b> | <b>other_alle</b> | <b>eaf</b> | <b>beta</b> | <b>se</b> | <b>pval</b> |
|-------------|---------------|-------------|-------------------|------------|-------------|-----------|-------------|
| rs4141983   | T             | C           |                   | 3.26E-01   | -2.64E-02   | 4.60E-03  | 9.69E-09    |
| rs354155    | G             | C           |                   | 9.23E-02   | -4.49E-02   | 7.50E-03  | 1.75E-09    |
| rs7551758   | T             | G           |                   | 5.33E-01   | 2.83E-02    | 4.30E-03  | 5.11E-11    |
| rs7538938   | T             | C           |                   | 5.60E-01   | 2.51E-02    | 4.30E-03  | 7.29E-09    |
| rs2568958   | G             | A           |                   | 6.04E-01   | 3.82E-02    | 4.40E-03  | 2.90E-18    |
| rs10913112  | C             | T           |                   | 3.78E-01   | -2.62E-02   | 4.50E-03  | 4.53E-09    |
| rs17641524  | C             | T           |                   | 2.10E-01   | -3.00E-02   | 5.30E-03  | 1.50E-08    |
| rs2111592   | G             | A           |                   | 3.14E-01   | 2.63E-02    | 4.60E-03  | 1.35E-08    |
| rs72948506  | G             | A           |                   | 2.98E-01   | 2.65E-02    | 4.70E-03  | 1.71E-08    |
| rs9831648   | G             | T           |                   | 7.74E-01   | -2.92E-02   | 5.20E-03  | 1.59E-08    |
| rs9831249   | A             | G           |                   | 4.17E-01   | 2.47E-02    | 4.40E-03  | 1.41E-08    |
| rs76954012  | T             | A           |                   | 9.31E-02   | 4.12E-02    | 7.40E-03  | 2.41E-08    |
| rs66511648  | T             | C           |                   | 2.84E-01   | 2.97E-02    | 4.80E-03  | 6.03E-10    |
| rs699927    | T             | G           |                   | 4.17E-01   | 2.40E-02    | 4.40E-03  | 3.79E-08    |
| rs247910    | A             | G           |                   | 4.57E-01   | 2.37E-02    | 4.30E-03  | 4.71E-08    |
| rs30266     | G             | A           |                   | 3.27E-01   | 3.66E-02    | 4.60E-03  | 1.43E-15    |
| rs7725715   | G             | A           |                   | 5.34E-01   | 2.90E-02    | 4.30E-03  | 1.61E-11    |
| rs150186873 | A             | C           |                   | 3.27E-02   | 7.04E-02    | 1.20E-02  | 4.51E-09    |
| rs67981811  | C             | G           |                   | 1.06E-01   | -6.20E-02   | 7.00E-03  | 1.14E-18    |
| rs2214123   | A             | G           |                   | 6.47E-01   | -2.61E-02   | 4.50E-03  | 8.56E-09    |
| rs2876520   | C             | G           |                   | 4.69E-01   | 2.60E-02    | 4.30E-03  | 2.24E-09    |
| rs9364755   | A             | G           |                   | 2.26E-01   | 2.83E-02    | 5.10E-03  | 3.49E-08    |
| rs10235664  | T             | C           |                   | 2.53E-01   | -2.70E-02   | 4.90E-03  | 4.68E-08    |
| rs3807865   | G             | A           |                   | 4.11E-01   | 3.10E-02    | 4.40E-03  | 1.09E-12    |
| rs59082935  | C             | T           |                   | 1.34E-01   | 3.63E-02    | 6.60E-03  | 3.07E-08    |
| rs2522831   | T             | C           |                   | 4.74E-01   | 2.40E-02    | 4.30E-03  | 2.11E-08    |
| rs4730387   | T             | A           |                   | 4.66E-01   | 2.38E-02    | 4.30E-03  | 4.12E-08    |
| rs150346963 | C             | T           |                   | 4.12E-01   | 2.83E-02    | 4.40E-03  | 1.16E-10    |
| rs1931388   | A             | G           |                   | 4.04E-01   | -2.95E-02   | 4.40E-03  | 1.68E-11    |
| rs59283172  | G             | A           |                   | 1.08E-01   | -3.90E-02   | 7.00E-03  | 2.41E-08    |
| rs62535714  | G             | A           |                   | 1.64E-01   | 3.39E-02    | 5.80E-03  | 4.69E-09    |
| rs2418449   | T             | C           |                   | 2.81E-01   | -2.81E-02   | 4.80E-03  | 4.25E-09    |
| rs1021363   | A             | G           |                   | 6.43E-01   | -3.00E-02   | 4.50E-03  | 2.29E-11    |
| rs198457    | C             | T           |                   | 1.89E-01   | -3.15E-02   | 5.60E-03  | 1.90E-08    |
| rs4497414   | T             | C           |                   | 4.40E-01   | 2.91E-02    | 4.40E-03  | 2.93E-11    |
| rs4936276   | G             | C           |                   | 6.22E-01   | 2.78E-02    | 4.40E-03  | 3.57E-10    |
| rs61914045  | G             | A           |                   | 2.03E-01   | 3.09E-02    | 5.40E-03  | 7.96E-09    |
| rs9529218   | C             | T           |                   | 2.03E-01   | -3.40E-02   | 5.40E-03  | 2.23E-10    |
| rs9536381   | C             | T           |                   | 3.26E-01   | 2.55E-02    | 4.60E-03  | 2.62E-08    |
| rs508502    | C             | T           |                   | 2.99E-01   | -2.64E-02   | 4.80E-03  | 3.56E-08    |
| rs1950829   | A             | G           |                   | 5.17E-01   | -2.97E-02   | 4.30E-03  | 4.74E-12    |
| rs7152906   | T             | C           |                   | 5.20E-01   | 2.58E-02    | 4.30E-03  | 1.87E-09    |
| rs754287    | T             | A           |                   | 3.66E-01   | -2.89E-02   | 4.50E-03  | 1.31E-10    |
| rs28541419  | C             | G           |                   | 2.31E-01   | -2.92E-02   | 5.20E-03  | 1.76E-08    |
| rs12919291  | G             | C           |                   | 1.88E-01   | 3.27E-02    | 5.50E-03  | 3.09E-09    |
| rs4799949   | C             | T           |                   | 6.68E-01   | -2.92E-02   | 4.60E-03  | 1.40E-10    |
| rs1367635   | T             | C           |                   | 5.15E-01   | 2.53E-02    | 4.30E-03  | 4.35E-09    |
| rs12967143  | G             | C           |                   | 7.01E-01   | -3.45E-02   | 4.70E-03  | 2.53E-13    |
| rs7241572   | G             | A           |                   | 2.05E-01   | 3.23E-02    | 5.40E-03  | 2.43E-09    |
| rs13037326  | C             | T           |                   | 2.60E-01   | 3.10E-02    | 4.90E-03  | 2.40E-10    |

**Supplementary Table S9:** Genome-wide significant independent SNPs for age at first birth

| <b>SNP</b> | <b>effect</b> | <b>_alle</b> | <b>other</b> | <b>_alle</b> | <b>beta</b> | <b>se</b> | <b>pval</b> |
|------------|---------------|--------------|--------------|--------------|-------------|-----------|-------------|
| rs6593917  | A             |              | G            |              | 2.04E-01    | 4.19E-02  | 1.15E-06    |
| rs28609148 | A             |              | G            |              | -4.26E-01   | 7.98E-02  | 9.42E-08    |
| rs677423   | A             |              | G            |              | -1.52E-01   | 3.21E-02  | 2.19E-06    |
| rs12705262 | C             |              | T            |              | 1.78E-01    | 3.17E-02  | 1.91E-08    |
| rs10983511 | A             |              | T            |              | 1.80E-01    | 3.67E-02  | 8.83E-07    |
| rs736777   | C             |              | A            |              | 2.97E-01    | 6.36E-02  | 3.13E-06    |
| rs9570089  | T             |              | C            |              | -1.72E-01   | 3.76E-02  | 4.91E-06    |
| rs7163091  | C             |              | T            |              | -2.20E-01   | 4.31E-02  | 3.15E-07    |
| rs7237950  | G             |              | C            |              | 1.49E-01    | 3.17E-02  | 2.58E-06    |

**Supplementary Table S10:** Genome-wide significant independent SNPs for age at last live birth

| <b>SNP</b> | <b>effect</b> | <b>_alle</b> | <b>other</b> | <b>_alle</b> | <b>eaf</b> | <b>beta</b> | <b>se</b> | <b>pval</b> |
|------------|---------------|--------------|--------------|--------------|------------|-------------|-----------|-------------|
| rs359253   | G             |              | A            |              | 6.39E-01   | -2.23E-02   | 3.52E-03  | 2.40E-10    |
| rs6446187  | C             |              | A            |              | 5.12E-01   | -2.92E-02   | 3.38E-03  | 6.20E-18    |
| rs1267490  | G             |              | A            |              | 8.14E-01   | -2.44E-02   | 4.35E-03  | 2.10E-08    |
| rs10964737 | T             |              | C            |              | 1.22E-02   | 8.63E-02    | 1.56E-02  | 2.90E-08    |
| rs12250380 | A             |              | G            |              | 5.83E-01   | 2.02E-02    | 3.44E-03  | 4.20E-09    |
| rs2208082  | G             |              | A            |              | 5.69E-01   | 1.91E-02    | 3.44E-03  | 2.90E-08    |

**Supplementary Table S11: Genome-wide significant independent SNPs for age at menopause**

| SNP         | effect | alle | other | alle | eaf      | beta      | se       | pval     |
|-------------|--------|------|-------|------|----------|-----------|----------|----------|
| rs200448    | T      |      | C     |      | 5.69E-01 | -2.15E-02 | 3.73E-03 | 8.10E-09 |
| rs9438982   | C      |      | A     |      | 6.82E-01 | -4.71E-02 | 3.95E-03 | 7.40E-33 |
| rs12046563  | A      |      | G     |      | 2.39E-01 | -2.52E-02 | 4.32E-03 | 5.50E-09 |
| rs55707872  | A      |      | C     |      | 3.14E-01 | 3.54E-02  | 3.98E-03 | 5.70E-19 |
| rs72708144  | T      |      | C     |      | 4.16E-02 | 5.88E-02  | 9.21E-03 | 1.70E-10 |
| rs12132692  | C      |      | T     |      | 9.57E-02 | 4.03E-02  | 6.27E-03 | 1.30E-10 |
| rs4495657   | T      |      | C     |      | 5.95E-01 | 3.28E-02  | 3.76E-03 | 2.40E-18 |
| rs4408133   | G      |      | C     |      | 3.35E-01 | 3.16E-02  | 3.91E-03 | 6.90E-16 |
| rs6667957   | T      |      | C     |      | 4.30E-01 | -2.60E-02 | 3.75E-03 | 4.30E-12 |
| rs7779      | G      |      | C     |      | 7.28E-02 | 3.99E-02  | 7.07E-03 | 1.70E-08 |
| rs809673    | A      |      | G     |      | 3.98E-01 | -4.17E-02 | 3.77E-03 | 1.70E-28 |
| rs17820747  | A      |      | C     |      | 2.38E-01 | 2.60E-02  | 4.34E-03 | 2.10E-09 |
| rs76928871  | A      |      | G     |      | 1.92E-01 | 4.30E-02  | 4.69E-03 | 4.30E-20 |
| rs62156695  | A      |      | G     |      | 1.04E-01 | -6.41E-02 | 6.04E-03 | 2.70E-26 |
| rs72827480  | T      |      | C     |      | 4.02E-01 | 2.71E-02  | 3.76E-03 | 6.00E-13 |
| rs7589040   | C      |      | T     |      | 2.10E-01 | -3.15E-02 | 4.50E-03 | 2.40E-12 |
| rs4491723   | A      |      | G     |      | 2.62E-01 | 3.11E-02  | 4.18E-03 | 1.10E-13 |
| rs4668354   | C      |      | G     |      | 6.25E-01 | 3.48E-02  | 3.80E-03 | 5.60E-20 |
| rs6435156   | C      |      | T     |      | 2.55E-01 | -2.63E-02 | 4.22E-03 | 4.50E-10 |
| rs6736096   | T      |      | C     |      | 5.16E-01 | 2.01E-02  | 3.68E-03 | 4.70E-08 |
| rs507926    | T      |      | C     |      | 8.33E-01 | 2.99E-02  | 4.94E-03 | 1.50E-09 |
| rs17646517  | C      |      | G     |      | 2.31E-02 | -7.16E-02 | 1.23E-02 | 5.10E-09 |
| rs2624847   | G      |      | T     |      | 7.43E-01 | 2.68E-02  | 4.22E-03 | 2.10E-10 |
| rs4679121   | C      |      | T     |      | 1.05E-01 | -3.81E-02 | 6.05E-03 | 3.10E-10 |
| rs9818740   | G      |      | A     |      | 2.75E-01 | -2.78E-02 | 4.14E-03 | 1.70E-11 |
| rs345985    | C      |      | T     |      | 4.20E-01 | -2.39E-02 | 3.75E-03 | 1.90E-10 |
| rs10937153  | G      |      | A     |      | 2.41E-01 | 3.61E-02  | 4.33E-03 | 7.40E-17 |
| rs7661090   | C      |      | T     |      | 1.07E-01 | -3.53E-02 | 5.96E-03 | 3.20E-09 |
| rs34811474  | G      |      | A     |      | 2.31E-01 | -2.39E-02 | 4.37E-03 | 4.50E-08 |
| rs6830848   | G      |      | T     |      | 4.69E-01 | -3.48E-02 | 3.68E-03 | 3.60E-21 |
| rs1565909   | C      |      | T     |      | 4.87E-01 | 6.23E-02  | 3.69E-03 | 3.50E-64 |
| rs9307242   | T      |      | C     |      | 3.55E-01 | -2.72E-02 | 3.82E-03 | 1.20E-12 |
| rs156520    | C      |      | A     |      | 2.85E-01 | 2.25E-02  | 4.12E-03 | 4.90E-08 |
| rs12503643  | G      |      | T     |      | 3.97E-01 | 4.67E-02  | 3.77E-03 | 2.60E-35 |
| rs419128    | G      |      | A     |      | 3.47E-01 | -3.48E-02 | 3.86E-03 | 2.20E-19 |
| rs10476835  | G      |      | A     |      | 4.87E-01 | 2.11E-02  | 3.69E-03 | 1.00E-08 |
| rs2688194   | T      |      | C     |      | 8.33E-02 | 4.41E-02  | 6.66E-03 | 3.60E-11 |
| rs72814771  | T      |      | G     |      | 9.86E-02 | 4.94E-02  | 6.25E-03 | 2.90E-15 |
| rs9313736   | G      |      | A     |      | 3.86E-01 | -3.14E-02 | 3.77E-03 | 8.00E-17 |
| rs58279426  | T      |      | C     |      | 4.79E-01 | 6.76E-02  | 3.70E-03 | 1.50E-74 |
| rs9358956   | G      |      | C     |      | 8.29E-01 | -6.59E-02 | 4.94E-03 | 1.60E-40 |
| rs4716056   | A      |      | G     |      | 3.74E-01 | 2.14E-02  | 3.79E-03 | 1.60E-08 |
| rs1655907   | T      |      | C     |      | 8.45E-01 | -2.90E-02 | 5.09E-03 | 1.10E-08 |
| rs2524119   | T      |      | C     |      | 5.48E-01 | 2.38E-02  | 3.69E-03 | 1.20E-10 |
| rs2844466   | T      |      | C     |      | 3.59E-01 | -4.72E-02 | 3.84E-03 | 8.30E-35 |
| rs78080415  | T      |      | C     |      | 1.45E-01 | 2.98E-02  | 5.25E-03 | 1.30E-08 |
| rs6912979   | T      |      | C     |      | 2.83E-01 | -2.55E-02 | 4.09E-03 | 4.30E-10 |
| rs7778113   | G      |      | T     |      | 3.46E-01 | 2.80E-02  | 3.92E-03 | 9.40E-13 |
| rs62445870  | C      |      | T     |      | 2.26E-02 | 7.46E-02  | 1.24E-02 | 1.90E-09 |
| rs4049337   | G      |      | C     |      | 6.99E-01 | -2.57E-02 | 4.02E-03 | 1.50E-10 |
| rs74742883  | T      |      | G     |      | 2.18E-01 | -3.11E-02 | 4.45E-03 | 3.00E-12 |
| rs2519673   | G      |      | A     |      | 6.31E-01 | -2.68E-02 | 3.82E-03 | 2.40E-12 |
| rs6961014   | C      |      | G     |      | 7.88E-01 | -2.90E-02 | 4.51E-03 | 1.20E-10 |
| rs112190116 | C      |      | T     |      | 1.11E-02 | 1.43E-01  | 1.76E-02 | 5.10E-16 |
| rs28797500  | T      |      | C     |      | 7.78E-01 | -8.46E-02 | 4.43E-03 | 3.80E-81 |
| rs7845046   | T      |      | A     |      | 9.49E-01 | -4.92E-02 | 8.38E-03 | 4.40E-09 |

|             |   |   |          |           |          |           |
|-------------|---|---|----------|-----------|----------|-----------|
| rs7827991   | C | A | 7.84E-02 | 4.17E-02  | 6.88E-03 | 1.30E-09  |
| rs77952879  | G | C | 7.83E-02 | -4.21E-02 | 6.95E-03 | 1.30E-09  |
| rs6470643   | A | C | 2.17E-01 | -2.83E-02 | 4.47E-03 | 2.40E-10  |
| rs10813912  | A | G | 6.23E-01 | 2.49E-02  | 3.80E-03 | 6.00E-11  |
| rs74701710  | G | A | 5.61E-02 | -4.83E-02 | 8.04E-03 | 1.80E-09  |
| rs10998203  | C | G | 2.04E-01 | -3.61E-02 | 4.58E-03 | 3.30E-15  |
| rs7087644   | A | G | 4.09E-02 | -8.39E-02 | 9.31E-03 | 2.00E-19  |
| rs6584351   | A | G | 5.11E-01 | 2.05E-02  | 3.68E-03 | 2.60E-08  |
| rs61870304  | A | G | 1.14E-01 | -3.68E-02 | 6.11E-03 | 1.70E-09  |
| rs728900    | T | A | 4.22E-01 | -3.17E-02 | 3.76E-03 | 3.20E-17  |
| rs1020622   | C | G | 4.25E-01 | 2.19E-02  | 3.73E-03 | 4.70E-09  |
| rs11031005  | T | C | 1.44E-01 | 5.46E-02  | 5.27E-03 | 3.90E-25  |
| rs7125555   | C | T | 4.84E-01 | -2.76E-02 | 3.69E-03 | 6.50E-14  |
| rs77100210  | A | C | 5.11E-02 | 1.13E-01  | 8.44E-03 | 5.60E-41  |
| rs2277339   | T | G | 1.06E-01 | -7.81E-02 | 6.00E-03 | 9.70E-39  |
| rs184540366 | G | T | 2.24E-02 | -8.48E-02 | 1.29E-02 | 4.60E-11  |
| rs75770066  | A | G | 3.08E-02 | 2.31E-01  | 1.06E-02 | 8.09E-105 |
| rs1790123   | C | T | 8.00E-01 | 3.47E-02  | 4.60E-03 | 4.70E-14  |
| rs28416520  | G | A | 4.56E-01 | -3.56E-02 | 3.73E-03 | 1.20E-21  |
| rs11571818  | T | C | 9.42E-03 | -1.13E-01 | 1.91E-02 | 3.30E-09  |
| rs4886238   | G | A | 3.27E-01 | 3.80E-02  | 3.95E-03 | 6.30E-22  |
| rs1760940   | A | C | 2.50E-01 | -3.81E-02 | 4.26E-03 | 4.40E-19  |
| rs17856037  | C | T | 2.53E-02 | -7.40E-02 | 1.17E-02 | 2.90E-10  |
| rs112217463 | G | A | 3.74E-01 | -3.73E-02 | 3.82E-03 | 1.50E-22  |
| rs2241522   | A | G | 3.39E-01 | -2.16E-02 | 3.90E-03 | 2.90E-08  |
| rs55848327  | G | A | 7.68E-01 | 2.52E-02  | 4.37E-03 | 8.80E-09  |
| rs888368    | A | G | 5.05E-01 | 2.22E-02  | 3.68E-03 | 1.70E-09  |
| rs9788714   | G | A | 3.81E-01 | -4.29E-02 | 3.81E-03 | 1.80E-29  |
| rs17680522  | A | G | 2.92E-01 | 2.32E-02  | 4.06E-03 | 1.20E-08  |
| rs8045589   | A | T | 4.87E-01 | -2.26E-02 | 3.70E-03 | 9.70E-10  |
| rs251723    | G | C | 3.44E-01 | 5.17E-02  | 3.88E-03 | 2.00E-40  |
| rs7499238   | C | T | 4.89E-01 | -2.90E-02 | 3.95E-03 | 2.10E-13  |
| rs10521305  | T | C | 5.94E-02 | 5.44E-02  | 7.78E-03 | 2.70E-12  |
| rs4782369   | G | C | 3.26E-01 | 3.00E-02  | 3.93E-03 | 2.10E-14  |
| rs6500437   | T | C | 3.15E-01 | -3.55E-02 | 3.97E-03 | 4.60E-19  |
| rs11650324  | A | G | 2.23E-01 | 3.91E-02  | 4.43E-03 | 1.10E-18  |
| rs2941506   | A | G | 6.84E-01 | 3.74E-02  | 3.97E-03 | 5.20E-21  |
| rs9915489   | A | T | 3.41E-01 | 4.36E-02  | 3.91E-03 | 7.20E-29  |
| rs3803756   | A | T | 6.40E-01 | -2.48E-02 | 3.84E-03 | 1.20E-10  |
| rs17650301  | A | C | 2.96E-01 | -4.01E-02 | 4.04E-03 | 2.80E-23  |
| rs349306    | G | A | 8.72E-01 | 5.25E-02  | 5.61E-03 | 8.60E-21  |
| rs2304192   | A | G | 6.75E-01 | -2.82E-02 | 4.04E-03 | 3.00E-12  |
| rs281163    | A | G | 3.31E-01 | 2.14E-02  | 3.92E-03 | 5.00E-08  |
| rs60907808  | A | G | 1.44E-01 | -4.44E-02 | 5.26E-03 | 3.20E-17  |
| rs73037453  | C | T | 1.91E-01 | -2.64E-02 | 4.69E-03 | 1.70E-08  |
| rs12609254  | C | T | 1.08E-01 | -3.39E-02 | 5.95E-03 | 1.20E-08  |
| rs34962991  | G | A | 3.64E-01 | -9.84E-02 | 3.83E-03 | 2.90E-145 |
| rs299168    | G | A | 9.76E-02 | 5.06E-02  | 6.29E-03 | 8.00E-16  |
| rs394448    | G | C | 5.15E-01 | -2.05E-02 | 3.70E-03 | 3.20E-08  |
| rs6139074   | A | C | 2.07E-01 | -3.06E-02 | 4.56E-03 | 1.80E-11  |
| rs16991615  | G | A | 6.14E-02 | 2.43E-01  | 7.66E-03 | 1.00E-200 |
| rs746748    | C | T | 6.87E-02 | 4.74E-02  | 7.29E-03 | 7.50E-11  |
| rs536092    | C | T | 3.83E-01 | 2.38E-02  | 3.81E-03 | 3.90E-10  |
| rs7347500   | G | A | 2.21E-01 | -4.89E-02 | 4.45E-03 | 4.50E-28  |
| rs10854167  | G | C | 2.13E-01 | -3.95E-02 | 4.51E-03 | 1.90E-18  |
| rs9607474   | C | T | 1.18E-01 | -3.24E-02 | 5.73E-03 | 1.50E-08  |
| rs9613667   | A | C | 3.48E-01 | -2.32E-02 | 3.88E-03 | 2.00E-09  |
| rs4821798   | T | C | 3.08E-01 | -4.35E-02 | 3.99E-03 | 1.20E-27  |

**Supplementary Table S12: Genome-wide significant independent SNPs for systolic blood pressure**

| <b>SNP</b>  | <b>effect</b> | <b>alle</b> | <b>other</b> | <b>alle</b> | <b>eaf</b> | <b>beta</b> | <b>se</b> | <b>pval</b> |
|-------------|---------------|-------------|--------------|-------------|------------|-------------|-----------|-------------|
| rs7796      | C             |             | G            |             | 4.89E-01   | -3.39E-01   | 3.14E-02  | 5.00E-27    |
| rs263532    | T             |             | C            |             | 4.25E-01   | -1.80E-01   | 3.07E-02  | 4.72E-09    |
| rs2493296   | C             |             | T            |             | 1.43E-01   | 4.18E-01    | 4.42E-02  | 3.14E-21    |
| rs2232460   | G             |             | A            |             | 3.34E-01   | -2.17E-01   | 3.20E-02  | 1.10E-11    |
| rs488834    | C             |             | T            |             | 7.65E-01   | -3.80E-01   | 3.65E-02  | 2.35E-25    |
| rs6699618   | C             |             | G            |             | 1.60E-01   | -9.12E-01   | 4.10E-02  | 1.68E-109   |
| rs75461554  | C             |             | T            |             | 2.01E-01   | -3.02E-01   | 3.77E-02  | 1.18E-15    |
| rs1889785   | G             |             | A            |             | 4.55E-01   | 1.78E-01    | 3.04E-02  | 4.35E-09    |
| rs404100    | C             |             | T            |             | 4.51E-01   | 1.94E-01    | 3.03E-02  | 1.68E-10    |
| rs34079867  | C             |             | T            |             | 2.66E-01   | 1.99E-01    | 3.54E-02  | 1.78E-08    |
| rs12137056  | C             |             | T            |             | 3.09E-01   | -2.33E-01   | 3.28E-02  | 1.29E-12    |
| rs11210029  | A             |             | G            |             | 3.68E-01   | 2.03E-01    | 3.13E-02  | 8.92E-11    |
| rs1408945   | G             |             | T            |             | 4.24E-01   | -3.20E-01   | 3.04E-02  | 8.33E-26    |
| rs1209384   | A             |             | G            |             | 6.12E-01   | -2.56E-01   | 3.13E-02  | 2.85E-16    |
| rs778124    | G             |             | A            |             | 3.74E-01   | 2.97E-01    | 3.11E-02  | 1.45E-21    |
| rs61772592  | A             |             | G            |             | 1.26E-01   | 3.18E-01    | 4.55E-02  | 2.86E-12    |
| rs12063372  | G             |             | A            |             | 3.85E-01   | 1.99E-01    | 3.18E-02  | 3.86E-10    |
| rs12136922  | G             |             | A            |             | 4.95E-01   | 2.03E-01    | 3.04E-02  | 2.69E-11    |
| rs658780    | T             |             | G            |             | 2.55E-01   | 2.03E-01    | 3.47E-02  | 5.29E-09    |
| rs786923    | C             |             | T            |             | 6.24E-01   | -3.08E-01   | 3.10E-02  | 2.82E-23    |
| rs7514579   | A             |             | C            |             | 2.29E-01   | -2.24E-01   | 3.61E-02  | 5.45E-10    |
| rs10776752  | G             |             | T            |             | 8.09E-02   | 8.21E-01    | 5.76E-02  | 4.61E-46    |
| rs59980837  | G             |             | T            |             | 1.78E-02   | 1.10E+00    | 1.16E-01  | 3.32E-21    |
| rs11585169  | T             |             | A            |             | 5.77E-01   | 1.80E-01    | 3.08E-02  | 5.34E-09    |
| rs76719272  | C             |             | T            |             | 1.31E-01   | -2.74E-01   | 4.61E-02  | 2.97E-09    |
| rs12731646  | C             |             | T            |             | 4.09E-01   | -1.89E-01   | 3.07E-02  | 7.21E-10    |
| rs10914124  | T             |             | C            |             | 3.83E-01   | -2.34E-01   | 3.12E-02  | 6.32E-14    |
| rs4651224   | C             |             | T            |             | 4.47E-01   | 1.99E-01    | 3.06E-02  | 9.00E-11    |
| rs12042924  | T             |             | C            |             | 4.72E-01   | 1.81E-01    | 3.03E-02  | 2.62E-09    |
| rs11120093  | C             |             | T            |             | 4.08E-01   | -1.79E-01   | 3.07E-02  | 5.13E-09    |
| rs2724377   | A             |             | G            |             | 4.70E-01   | -1.94E-01   | 3.01E-02  | 1.29E-10    |
| rs7555285   | G             |             | C            |             | 8.01E-01   | 2.29E-01    | 3.76E-02  | 1.05E-09    |
| rs68085857  | C             |             | T            |             | 2.34E-01   | 2.74E-01    | 3.57E-02  | 1.68E-14    |
| rs72742507  | C             |             | T            |             | 3.00E-01   | -2.05E-01   | 3.28E-02  | 3.80E-10    |
| rs1745417   | C             |             | T            |             | 5.20E-01   | 2.87E-01    | 3.01E-02  | 1.59E-21    |
| rs2493134   | T             |             | C            |             | 4.07E-01   | 3.74E-01    | 3.09E-02  | 1.10E-33    |
| rs1565440   | G             |             | A            |             | 3.75E-01   | 1.75E-01    | 3.11E-02  | 1.93E-08    |
| rs4926499   | G             |             | C            |             | 8.26E-01   | 2.97E-01    | 4.38E-02  | 1.33E-11    |
| rs17760259  | T             |             | C            |             | 4.28E-01   | 2.65E-01    | 3.04E-02  | 2.25E-18    |
| rs2384063   | C             |             | T            |             | 7.61E-01   | 3.27E-01    | 3.57E-02  | 6.33E-20    |
| rs1275985   | C             |             | T            |             | 6.13E-01   | -5.41E-01   | 3.08E-02  | 4.73E-69    |
| rs13420463  | A             |             | G            |             | 2.27E-01   | -3.14E-01   | 3.60E-02  | 2.72E-18    |
| rs4952609   | A             |             | G            |             | 2.56E-01   | -2.12E-01   | 3.47E-02  | 9.60E-10    |
| rs115262049 | A             |             | T            |             | 8.68E-02   | -5.89E-01   | 5.52E-02  | 1.29E-26    |
| rs12464602  | G             |             | A            |             | 6.21E-01   | -2.44E-01   | 3.15E-02  | 1.02E-14    |
| rs13016772  | C             |             | T            |             | 7.65E-01   | 2.52E-01    | 3.55E-02  | 1.23E-12    |
| rs2249105   | A             |             | G            |             | 3.68E-01   | -2.93E-01   | 3.13E-02  | 7.63E-21    |
| rs10188003  | C             |             | T            |             | 3.93E-01   | 1.88E-01    | 3.07E-02  | 8.80E-10    |
| rs6731373   | G             |             | A            |             | 3.49E-01   | 1.91E-01    | 3.26E-02  | 4.18E-09    |
| rs6732123   | G             |             | C            |             | 4.17E-01   | -1.74E-01   | 3.07E-02  | 1.52E-08    |
| rs4577304   | T             |             | C            |             | 4.77E-01   | 1.77E-01    | 3.02E-02  | 4.99E-09    |
| rs72847885  | A             |             | G            |             | 3.37E-01   | -2.41E-01   | 3.18E-02  | 3.08E-14    |
| rs10207726  | C             |             | T            |             | 2.96E-01   | -2.14E-01   | 3.30E-02  | 8.06E-11    |
| rs6737318   | A             |             | G            |             | 2.22E-01   | -2.35E-01   | 3.64E-02  | 1.13E-10    |
| rs2580350   | G             |             | A            |             | 5.61E-01   | 1.77E-01    | 3.07E-02  | 8.39E-09    |
| rs17257081  | A             |             | G            |             | 1.94E-01   | -2.27E-01   | 3.92E-02  | 6.35E-09    |

|             |   |   |          |           |          |          |
|-------------|---|---|----------|-----------|----------|----------|
| rs55944332  | A | G | 2.37E-01 | 2.61E-01  | 3.55E-02 | 1.79E-13 |
| rs62170470  | T | C | 3.98E-01 | -1.97E-01 | 3.21E-02 | 7.68E-10 |
| rs55732192  | G | T | 9.47E-02 | -3.36E-01 | 5.21E-02 | 1.15E-10 |
| rs268263    | T | A | 7.50E-01 | 5.94E-01  | 3.53E-02 | 1.77E-63 |
| rs10048760  | T | G | 4.71E-01 | 1.86E-01  | 3.01E-02 | 6.56E-10 |
| rs71421551  | G | C | 2.89E-01 | 2.37E-01  | 3.33E-02 | 1.05E-12 |
| rs17610485  | T | A | 5.76E-01 | 1.74E-01  | 3.04E-02 | 1.06E-08 |
| rs4894132   | T | C | 2.72E-01 | -2.47E-01 | 3.42E-02 | 5.51E-13 |
| rs12473915  | G | A | 2.02E-01 | -2.95E-01 | 3.75E-02 | 3.42E-15 |
| rs13412750  | G | A | 2.71E-01 | -2.89E-01 | 3.41E-02 | 2.32E-17 |
| rs12693982  | C | T | 4.02E-01 | 2.58E-01  | 3.09E-02 | 7.49E-17 |
| rs3845811   | C | G | 4.34E-01 | 2.94E-01  | 3.09E-02 | 1.88E-21 |
| rs12694277  | T | C | 7.05E-01 | 2.02E-01  | 3.35E-02 | 1.80E-09 |
| rs2161967   | T | G | 5.72E-01 | -2.84E-01 | 3.07E-02 | 2.87E-20 |
| rs3828282   | C | G | 5.72E-01 | -1.86E-01 | 3.18E-02 | 5.29E-09 |
| rs10804330  | T | C | 4.33E-01 | -2.35E-01 | 3.06E-02 | 1.62E-14 |
| rs1044822   | C | T | 1.48E-01 | -2.48E-01 | 4.24E-02 | 5.16E-09 |
| rs3754944   | C | A | 5.88E-01 | 1.77E-01  | 3.08E-02 | 9.30E-09 |
| rs139354822 | T | C | 2.96E-02 | -6.12E-01 | 9.75E-02 | 3.51E-10 |
| rs9848170   | G | C | 5.97E-01 | 3.23E-01  | 3.07E-02 | 7.01E-26 |
| rs11925504  | G | A | 5.72E-01 | -2.90E-01 | 3.05E-02 | 1.78E-21 |
| rs189267552 | T | A | 1.32E-02 | -8.66E-01 | 1.39E-01 | 4.55E-10 |
| rs2643826   | C | T | 4.51E-01 | 4.47E-01  | 3.06E-02 | 1.74E-48 |
| rs68115553  | A | G | 1.99E-02 | 6.45E-01  | 1.14E-01 | 1.74E-08 |
| rs743395    | C | T | 3.83E-01 | 2.60E-01  | 3.17E-02 | 2.55E-16 |
| rs6788984   | A | G | 1.44E-01 | -3.00E-01 | 4.32E-02 | 3.81E-12 |
| rs1052501   | C | T | 8.33E-01 | 2.26E-01  | 4.12E-02 | 4.14E-08 |
| rs6771917   | T | C | 7.52E-01 | 3.79E-01  | 3.55E-02 | 1.39E-26 |
| rs7615099   | A | G | 3.33E-01 | -1.89E-01 | 3.21E-02 | 3.90E-09 |
| rs6445583   | G | A | 7.47E-01 | 2.77E-01  | 3.49E-02 | 1.90E-15 |
| rs3772219   | A | C | 3.18E-01 | -2.73E-01 | 3.24E-02 | 3.10E-17 |
| rs7618284   | G | C | 3.39E-01 | -1.89E-01 | 3.31E-02 | 1.10E-08 |
| rs4499560   | A | T | 6.83E-01 | 2.20E-01  | 3.26E-02 | 1.46E-11 |
| rs1375564   | C | T | 6.40E-01 | 2.58E-01  | 3.15E-02 | 2.84E-16 |
| rs12637573  | A | G | 5.28E-01 | 1.73E-01  | 3.02E-02 | 9.95E-09 |
| rs6438857   | T | C | 4.23E-01 | -2.74E-01 | 3.05E-02 | 3.13E-19 |
| rs9880098   | G | A | 3.95E-01 | 3.08E-01  | 3.08E-02 | 1.59E-23 |
| rs1199330   | A | G | 1.18E-01 | 2.65E-01  | 4.70E-02 | 1.65E-08 |
| rs9876694   | C | T | 5.84E-02 | 4.71E-01  | 6.51E-02 | 4.64E-13 |
| rs4408839   | A | G | 2.57E-01 | 2.30E-01  | 3.45E-02 | 2.42E-11 |
| rs79539362  | T | C | 1.01E-01 | -4.00E-01 | 5.04E-02 | 2.09E-15 |
| rs6788907   | G | A | 2.68E-01 | 2.21E-01  | 3.39E-02 | 7.31E-11 |
| rs3980686   | G | T | 1.08E-01 | -5.00E-01 | 4.87E-02 | 1.03E-24 |
| rs1290784   | C | T | 4.48E-01 | 4.12E-01  | 3.03E-02 | 2.97E-42 |
| rs2111557   | C | T | 4.68E-01 | 1.76E-01  | 3.02E-02 | 5.22E-09 |
| rs4955575   | A | C | 2.54E-01 | -2.16E-01 | 3.48E-02 | 5.63E-10 |
| rs262986    | G | A | 4.70E-01 | -2.37E-01 | 3.05E-02 | 7.67E-15 |
| rs13091418  | C | G | 3.34E-01 | 2.23E-01  | 3.25E-02 | 6.15E-12 |
| rs9869437   | C | A | 3.52E-01 | -2.00E-01 | 3.18E-02 | 3.22E-10 |
| rs34535756  | C | T | 3.94E-02 | 4.78E-01  | 7.86E-02 | 1.18E-09 |
| rs1290933   | C | A | 6.92E-01 | -2.85E-01 | 3.27E-02 | 3.17E-18 |
| rs2498323   | G | A | 9.80E-02 | 3.17E-01  | 5.17E-02 | 8.51E-10 |
| rs2610990   | A | G | 7.36E-01 | 2.90E-01  | 3.43E-02 | 2.86E-17 |
| rs55924432  | C | T | 4.01E-01 | 2.65E-01  | 3.17E-02 | 5.70E-17 |
| rs2291434   | G | T | 5.34E-01 | -2.62E-01 | 3.03E-02 | 5.10E-18 |
| rs12511987  | T | G | 1.77E-01 | 2.33E-01  | 3.99E-02 | 5.39E-09 |
| rs62309747  | G | A | 4.73E-01 | -2.24E-01 | 3.04E-02 | 1.59E-13 |
| rs60991988  | T | G | 1.07E-01 | -3.79E-01 | 4.98E-02 | 2.82E-14 |

|             |   |   |          |           |          |           |
|-------------|---|---|----------|-----------|----------|-----------|
| rs13107261  | G | A | 3.69E-01 | -1.78E-01 | 3.14E-02 | 1.57E-08  |
| rs5020545   | C | T | 4.44E-01 | -2.18E-01 | 3.05E-02 | 9.71E-13  |
| rs12509595  | T | C | 2.92E-01 | 8.37E-01  | 3.34E-02 | 2.55E-138 |
| rs6823199   | T | C | 2.56E-01 | -2.09E-01 | 3.48E-02 | 1.72E-09  |
| rs17010957  | T | C | 1.46E-01 | 5.34E-01  | 4.30E-02 | 1.78E-35  |
| rs13149209  | T | C | 2.23E-01 | -2.81E-01 | 3.67E-02 | 1.97E-14  |
| rs13107325  | C | T | 7.39E-02 | -9.09E-01 | 5.92E-02 | 4.22E-53  |
| rs11097909  | T | C | 8.53E-01 | 3.63E-01  | 4.30E-02 | 3.35E-17  |
| rs1493132   | T | C | 3.40E-01 | 1.77E-01  | 3.18E-02 | 2.73E-08  |
| rs1814951   | G | A | 8.79E-01 | -3.23E-01 | 4.66E-02 | 3.91E-12  |
| rs4834792   | T | A | 4.80E-01 | 1.97E-01  | 3.03E-02 | 7.24E-11  |
| rs7439567   | C | T | 4.11E-01 | 2.54E-01  | 3.09E-02 | 2.31E-16  |
| rs72719160  | A | T | 3.17E-01 | 2.24E-01  | 3.24E-02 | 4.34E-12  |
| rs2353940   | T | C | 2.49E-01 | 2.08E-01  | 3.58E-02 | 6.85E-09  |
| rs73855810  | G | A | 1.41E-01 | 2.73E-01  | 4.34E-02 | 3.04E-10  |
| rs7683728   | C | T | 5.31E-01 | -3.65E-01 | 3.04E-02 | 2.43E-33  |
| rs12643599  | A | G | 3.61E-01 | -3.13E-01 | 3.13E-02 | 1.23E-23  |
| rs17035181  | T | G | 1.45E-01 | -3.07E-01 | 4.29E-02 | 7.61E-13  |
| rs869396    | C | A | 4.66E-01 | -2.12E-01 | 3.05E-02 | 4.12E-12  |
| rs4957026   | A | G | 6.60E-01 | -1.98E-01 | 3.23E-02 | 8.12E-10  |
| rs10069690  | C | T | 2.58E-01 | 3.10E-01  | 3.69E-02 | 4.47E-17  |
| rs7725413   | C | T | 7.70E-01 | -1.99E-01 | 3.59E-02 | 3.07E-08  |
| rs12656497  | T | C | 5.97E-01 | 6.38E-01  | 3.07E-02 | 7.14E-96  |
| rs10941043  | T | G | 2.90E-01 | 2.59E-01  | 3.32E-02 | 6.42E-15  |
| rs7722243   | G | A | 5.04E-01 | -2.05E-01 | 3.02E-02 | 1.21E-11  |
| rs1664781   | G | A | 6.93E-01 | 2.64E-01  | 3.26E-02 | 5.69E-16  |
| rs28650790  | C | T | 1.89E-01 | 2.29E-01  | 3.87E-02 | 3.30E-09  |
| rs12657950  | C | T | 7.44E-02 | 4.55E-01  | 5.90E-02 | 1.27E-14  |
| rs6870654   | T | C | 2.55E-01 | -2.14E-01 | 3.47E-02 | 7.58E-10  |
| rs73103937  | T | C | 2.68E-01 | -2.05E-01 | 3.44E-02 | 2.35E-09  |
| rs7703560   | A | G | 3.00E-01 | 2.25E-01  | 3.33E-02 | 1.51E-11  |
| rs246973    | C | T | 2.88E-01 | 2.48E-01  | 3.35E-02 | 1.45E-13  |
| rs6452769   | G | A | 2.05E-01 | -3.14E-01 | 3.77E-02 | 7.82E-17  |
| rs76443575  | G | C | 3.59E-02 | -5.23E-01 | 8.16E-02 | 1.40E-10  |
| rs1871190   | G | T | 3.35E-01 | 1.95E-01  | 3.24E-02 | 1.66E-09  |
| rs11241313  | C | T | 3.11E-01 | -2.07E-01 | 3.26E-02 | 2.23E-10  |
| rs1422279   | C | T | 3.86E-01 | 3.31E-01  | 3.09E-02 | 1.05E-26  |
| rs9327297   | C | G | 3.32E-01 | -2.75E-01 | 3.19E-02 | 8.07E-18  |
| rs10045307  | C | G | 2.27E-01 | 2.02E-01  | 3.62E-02 | 2.21E-08  |
| rs6892983   | C | A | 4.02E-01 | 3.43E-01  | 3.07E-02 | 7.11E-29  |
| rs702395    | C | T | 4.37E-01 | 2.32E-01  | 3.05E-02 | 3.24E-14  |
| rs2913920   | C | T | 7.65E-01 | 2.42E-01  | 3.59E-02 | 1.62E-11  |
| rs1957563   | C | T | 2.65E-01 | 3.63E-01  | 3.42E-02 | 2.32E-26  |
| rs11960210  | T | C | 3.76E-01 | -4.73E-01 | 3.13E-02 | 1.25E-51  |
| rs13358657  | A | G | 1.33E-01 | 3.88E-01  | 4.45E-02 | 2.95E-18  |
| rs3860770   | G | A | 2.92E-01 | -2.66E-01 | 3.33E-02 | 1.20E-15  |
| rs12153395  | G | A | 1.15E-01 | -3.30E-01 | 4.86E-02 | 1.07E-11  |
| rs2745599   | A | G | 4.48E-01 | -2.16E-01 | 3.17E-02 | 8.96E-12  |
| rs1575290   | C | T | 4.73E-01 | 1.97E-01  | 3.01E-02 | 5.59E-11  |
| rs1630736   | C | T | 4.65E-01 | -1.71E-01 | 3.09E-02 | 3.52E-08  |
| rs9349379   | A | G | 4.07E-01 | -2.66E-01 | 3.12E-02 | 1.31E-17  |
| rs9368222   | C | A | 2.69E-01 | 2.28E-01  | 3.39E-02 | 1.84E-11  |
| rs2655445   | G | A | 6.07E-01 | -2.02E-01 | 3.12E-02 | 9.58E-11  |
| rs79782817  | G | T | 1.03E-01 | 5.32E-01  | 4.99E-02 | 1.43E-26  |
| rs116025100 | G | A | 3.83E-02 | 5.37E-01  | 8.51E-02 | 2.86E-10  |
| rs2607015   | G | C | 4.20E-01 | 4.47E-01  | 3.09E-02 | 2.76E-47  |
| rs2815063   | C | A | 1.32E-01 | 2.76E-01  | 4.58E-02 | 1.76E-09  |
| rs7763558   | G | A | 3.24E-01 | 3.36E-01  | 3.21E-02 | 1.17E-25  |

|             |   |   |          |           |          |          |
|-------------|---|---|----------|-----------|----------|----------|
| rs11967262  | C | G | 4.87E-01 | 1.72E-01  | 3.11E-02 | 3.43E-08 |
| rs78648104  | T | C | 9.25E-02 | 4.29E-01  | 5.41E-02 | 2.36E-15 |
| rs1984195   | G | A | 4.89E-01 | 2.41E-01  | 3.03E-02 | 1.77E-15 |
| rs9361836   | C | T | 3.17E-01 | 2.20E-01  | 3.24E-02 | 1.25E-11 |
| rs6921291   | C | T | 1.91E-01 | 3.58E-01  | 3.85E-02 | 1.58E-20 |
| rs9486916   | C | T | 1.98E-01 | 2.66E-01  | 3.85E-02 | 5.42E-12 |
| rs961764    | C | G | 5.75E-01 | 1.91E-01  | 3.05E-02 | 3.74E-10 |
| rs10782230  | G | A | 4.85E-01 | 2.11E-01  | 3.02E-02 | 2.91E-12 |
| rs9401913   | G | A | 4.39E-01 | 5.20E-01  | 3.05E-02 | 3.66E-65 |
| rs2327429   | T | C | 2.92E-01 | -2.00E-01 | 3.38E-02 | 3.16E-09 |
| rs8180684   | C | T | 2.90E-01 | 2.13E-01  | 3.35E-02 | 1.80E-10 |
| rs7765526   | A | G | 5.37E-01 | -2.01E-01 | 3.07E-02 | 5.88E-11 |
| rs17080102  | G | C | 6.94E-02 | -8.09E-01 | 5.94E-02 | 3.52E-42 |
| rs1293969   | T | C | 2.52E-01 | 1.99E-01  | 3.47E-02 | 1.03E-08 |
| rs509833    | A | G | 8.61E-01 | -3.29E-01 | 4.40E-02 | 7.08E-14 |
| rs12661036  | T | C | 2.25E-01 | 2.10E-01  | 3.74E-02 | 1.82E-08 |
| rs7744902   | G | A | 7.66E-02 | -4.09E-01 | 5.93E-02 | 5.64E-12 |
| rs6978112   | C | T | 4.11E-01 | 2.29E-01  | 3.09E-02 | 1.34E-13 |
| rs10282122  | C | T | 6.68E-01 | -3.02E-01 | 3.27E-02 | 2.46E-20 |
| rs73049928  | A | G | 1.94E-01 | 2.38E-01  | 3.92E-02 | 1.20E-09 |
| rs3807925   | A | G | 3.50E-01 | 1.86E-01  | 3.19E-02 | 5.39E-09 |
| rs28688791  | T | C | 1.98E-01 | 3.22E-01  | 3.80E-02 | 2.34E-17 |
| rs112509803 | G | C | 1.14E-01 | -2.64E-01 | 4.77E-02 | 3.18E-08 |
| rs3735533   | T | C | 9.26E-01 | 9.10E-01  | 5.77E-02 | 5.29E-56 |
| rs6961048   | C | G | 1.04E-01 | 5.30E-01  | 4.97E-02 | 1.43E-26 |
| rs977184    | T | C | 3.75E-01 | 1.84E-01  | 3.14E-02 | 4.86E-09 |
| rs11977526  | G | A | 4.01E-01 | -3.21E-01 | 3.12E-02 | 6.62E-25 |
| rs12668436  | T | C | 2.46E-01 | 2.15E-01  | 3.50E-02 | 7.88E-10 |
| rs848445    | T | C | 7.15E-01 | 2.03E-01  | 3.39E-02 | 2.28E-09 |
| rs67617547  | C | G | 3.30E-01 | -1.80E-01 | 3.22E-02 | 2.39E-08 |
| rs42032     | G | A | 2.64E-01 | -3.23E-01 | 3.45E-02 | 7.39E-21 |
| rs2392929   | T | G | 2.03E-01 | 7.51E-01  | 3.79E-02 | 1.96E-87 |
| rs34072724  | G | A | 4.89E-01 | -2.42E-01 | 3.03E-02 | 1.37E-15 |
| rs35680304  | C | T | 5.93E-01 | 2.69E-01  | 3.10E-02 | 3.76E-18 |
| rs75672964  | C | T | 4.18E-02 | 5.89E-01  | 8.39E-02 | 2.35E-12 |
| rs73727605  | G | A | 6.63E-02 | 3.62E-01  | 6.23E-02 | 6.60E-09 |
| rs3918226   | C | T | 8.11E-02 | 6.64E-01  | 5.75E-02 | 8.46E-31 |
| rs10224210  | T | C | 2.79E-01 | 3.83E-01  | 3.40E-02 | 1.60E-29 |
| rs1870735   | C | G | 5.47E-01 | -2.06E-01 | 3.11E-02 | 3.60E-11 |
| rs6558535   | T | C | 7.15E-01 | 2.16E-01  | 3.36E-02 | 1.33E-10 |
| rs1821002   | C | G | 5.89E-01 | -3.79E-01 | 3.07E-02 | 5.19E-35 |
| rs10866828  | C | T | 2.50E-01 | 2.48E-01  | 3.55E-02 | 3.19E-12 |
| rs7821832   | T | G | 2.55E-01 | -4.22E-01 | 3.48E-02 | 6.67E-34 |
| rs77375686  | A | G | 1.12E-01 | 3.47E-01  | 4.85E-02 | 8.38E-13 |
| rs1906672   | G | A | 2.32E-01 | 2.97E-01  | 3.58E-02 | 1.20E-16 |
| rs4873492   | C | T | 1.72E-01 | 3.43E-01  | 4.03E-02 | 1.61E-17 |
| rs2354862   | A | C | 3.59E-01 | -2.51E-01 | 3.17E-02 | 2.42E-15 |
| rs13253358  | C | T | 2.98E-01 | 2.13E-01  | 3.30E-02 | 1.13E-10 |
| rs2126474   | G | T | 4.13E-01 | -2.60E-01 | 3.06E-02 | 1.87E-17 |
| rs9918879   | G | T | 1.03E-01 | -2.98E-01 | 4.99E-02 | 2.28E-09 |
| rs148401029 | C | A | 3.52E-02 | -4.62E-01 | 8.48E-02 | 4.97E-08 |
| rs62512914  | A | G | 4.15E-01 | -2.07E-01 | 3.06E-02 | 1.42E-11 |
| rs7830689   | G | A | 4.22E-01 | 1.77E-01  | 3.06E-02 | 8.07E-09 |
| rs34917849  | G | C | 1.27E-01 | 3.12E-01  | 4.54E-02 | 5.97E-12 |
| rs1786345   | A | C | 4.34E-01 | -2.07E-01 | 3.07E-02 | 1.34E-11 |
| rs79069610  | T | C | 5.00E-02 | 4.01E-01  | 7.27E-02 | 3.68E-08 |
| rs35783704  | G | A | 1.04E-01 | -4.62E-01 | 5.07E-02 | 8.81E-20 |
| rs2470004   | C | T | 8.18E-01 | -3.45E-01 | 3.92E-02 | 1.28E-18 |

|             |   |   |          |           |          |          |
|-------------|---|---|----------|-----------|----------|----------|
| rs4598218   | C | T | 6.16E-01 | 1.91E-01  | 3.13E-02 | 1.00E-09 |
| rs7012866   | T | G | 5.01E-01 | 2.33E-01  | 3.01E-02 | 1.21E-14 |
| rs4440615   | G | A | 6.32E-01 | -2.20E-01 | 3.12E-02 | 1.87E-12 |
| rs4961293   | C | T | 4.51E-01 | 2.27E-01  | 3.03E-02 | 7.35E-14 |
| rs7463212   | T | A | 5.45E-01 | -2.75E-01 | 3.05E-02 | 1.81E-19 |
| rs60191654  | A | G | 1.88E-01 | 2.38E-01  | 3.85E-02 | 5.88E-10 |
| rs927315    | C | T | 4.71E-01 | 1.69E-01  | 3.03E-02 | 2.44E-08 |
| rs1332813   | T | C | 6.49E-01 | -2.20E-01 | 3.14E-02 | 2.32E-12 |
| rs9886665   | T | C | 7.33E-01 | -2.05E-01 | 3.43E-02 | 2.47E-09 |
| rs4553000   | C | T | 5.14E-01 | -2.04E-01 | 3.00E-02 | 1.09E-11 |
| rs76452347  | C | T | 2.05E-01 | -2.97E-01 | 3.97E-02 | 7.13E-14 |
| rs10746963  | A | G | 8.17E-01 | 2.18E-01  | 3.88E-02 | 2.05E-08 |
| rs7045409   | T | A | 3.67E-01 | -1.86E-01 | 3.13E-02 | 2.55E-09 |
| rs10980408  | T | C | 3.59E-02 | 7.61E-01  | 8.27E-02 | 3.83E-20 |
| rs2900568   | C | T | 5.18E-01 | -1.89E-01 | 3.00E-02 | 2.96E-10 |
| rs34025993  | A | G | 5.86E-01 | -2.23E-01 | 3.08E-02 | 4.71E-13 |
| rs7854147   | A | G | 1.23E-01 | -3.06E-01 | 4.61E-02 | 3.29E-11 |
| rs3104552   | T | C | 4.39E-01 | -2.45E-01 | 3.03E-02 | 6.31E-16 |
| rs6271      | C | T | 7.35E-02 | -5.55E-01 | 6.11E-02 | 1.18E-19 |
| rs11145807  | A | G | 5.94E-01 | -2.14E-01 | 3.22E-02 | 3.54E-11 |
| rs11252324  | G | T | 7.71E-02 | -4.16E-01 | 5.73E-02 | 3.61E-13 |
| rs1623474   | C | T | 3.30E-01 | 3.83E-01  | 3.21E-02 | 7.66E-33 |
| rs12258967  | C | G | 2.95E-01 | -6.33E-01 | 3.37E-02 | 1.08E-78 |
| rs3802517   | T | A | 4.62E-01 | 2.53E-01  | 3.01E-02 | 4.65E-17 |
| rs12264186  | C | T | 1.87E-01 | 2.14E-01  | 3.87E-02 | 3.58E-08 |
| rs4284362   | C | A | 7.18E-01 | -2.26E-01 | 3.38E-02 | 2.61E-11 |
| rs34130368  | G | T | 1.17E-01 | -3.02E-01 | 4.97E-02 | 1.28E-09 |
| rs4245599   | A | G | 5.42E-01 | 1.79E-01  | 3.05E-02 | 4.03E-09 |
| rs57946343  | T | C | 1.47E-01 | -7.16E-01 | 4.26E-02 | 2.10E-63 |
| rs2236295   | G | T | 3.98E-01 | -3.03E-01 | 3.09E-02 | 1.04E-22 |
| rs2177843   | C | T | 1.51E-01 | 4.39E-01  | 4.32E-02 | 2.80E-24 |
| rs10749572  | G | T | 5.44E-01 | -2.03E-01 | 3.02E-02 | 1.88E-11 |
| rs111866816 | C | T | 7.09E-02 | 3.57E-01  | 5.97E-02 | 2.29E-09 |
| rs2689690   | C | T | 3.68E-01 | -2.70E-01 | 3.16E-02 | 1.15E-17 |
| rs57866767  | T | C | 4.32E-01 | -4.50E-01 | 3.04E-02 | 1.14E-49 |
| rs1006545   | G | T | 8.87E-01 | 6.85E-01  | 4.80E-02 | 3.50E-46 |
| rs11191580  | T | C | 8.24E-02 | -1.10E+00 | 5.50E-02 | 7.74E-89 |
| rs117464403 | G | A | 1.83E-02 | 8.64E-01  | 1.20E-01 | 5.80E-13 |
| rs12255372  | G | T | 2.88E-01 | 2.36E-01  | 3.35E-02 | 1.94E-12 |
| rs60444686  | G | A | 4.06E-02 | 5.91E-01  | 7.82E-02 | 4.42E-14 |
| rs740746    | G | A | 7.32E-01 | 4.56E-01  | 3.42E-02 | 1.42E-40 |
| rs11592107  | G | A | 3.10E-01 | 3.02E-01  | 3.26E-02 | 1.55E-20 |
| rs7093894   | C | A | 1.51E-01 | 2.36E-01  | 4.27E-02 | 3.16E-08 |
| rs7912283   | G | A | 6.47E-01 | -2.14E-01 | 3.22E-02 | 2.94E-11 |
| rs1133400   | A | G | 2.14E-01 | 2.98E-01  | 3.76E-02 | 2.53E-15 |
| rs4980379   | C | T | 3.72E-01 | 5.76E-01  | 3.20E-02 | 2.47E-72 |
| rs74048190  | T | C | 4.78E-02 | 4.40E-01  | 7.57E-02 | 6.07E-09 |
| rs2957688   | G | A | 4.71E-01 | 3.47E-01  | 3.04E-02 | 2.74E-30 |
| rs1544861   | T | C | 6.61E-01 | -1.97E-01 | 3.18E-02 | 5.66E-10 |
| rs2014408   | C | T | 2.09E-01 | 5.17E-01  | 3.73E-02 | 1.26E-43 |
| rs177551    | C | A | 1.34E-01 | 3.73E-01  | 4.42E-02 | 3.47E-17 |
| rs17762     | G | A | 7.77E-02 | 4.12E-01  | 5.71E-02 | 5.60E-13 |
| rs1382472   | G | A | 4.04E-01 | -1.92E-01 | 3.07E-02 | 4.47E-10 |
| rs871004    | G | A | 3.48E-01 | 2.34E-01  | 3.17E-02 | 1.65E-13 |
| rs10501122  | T | C | 3.61E-01 | -1.92E-01 | 3.15E-02 | 1.18E-09 |
| rs11604357  | C | A | 1.62E-01 | -2.77E-01 | 4.11E-02 | 1.60E-11 |
| rs7107356   | A | G | 5.04E-01 | 4.60E-01  | 3.01E-02 | 1.63E-52 |
| rs2904315   | A | G | 6.87E-01 | 2.08E-01  | 3.25E-02 | 1.58E-10 |

|             |   |   |          |           |          |          |
|-------------|---|---|----------|-----------|----------|----------|
| rs2276153   | C | G | 2.43E-01 | -3.30E-01 | 3.51E-02 | 6.56E-21 |
| rs66864335  | G | A | 2.21E-01 | -3.96E-01 | 3.65E-02 | 1.79E-27 |
| rs74538877  | G | C | 5.57E-02 | -3.86E-01 | 7.07E-02 | 4.97E-08 |
| rs7395791   | G | A | 4.42E-01 | -2.16E-01 | 3.08E-02 | 2.19E-12 |
| rs72931748  | A | G | 9.85E-02 | -3.97E-01 | 5.29E-02 | 6.40E-14 |
| rs10501410  | G | A | 6.92E-02 | 4.12E-01  | 6.07E-02 | 1.10E-11 |
| rs2289124   | G | A | 1.67E-01 | -3.08E-01 | 4.15E-02 | 1.14E-13 |
| rs604723    | T | C | 7.24E-01 | 6.55E-01  | 3.39E-02 | 2.55E-83 |
| rs629864    | C | T | 6.50E-01 | -1.87E-01 | 3.19E-02 | 4.69E-09 |
| rs7926110   | T | G | 3.27E-01 | -2.60E-01 | 3.21E-02 | 5.71E-16 |
| rs236916    | G | A | 1.35E-01 | 3.17E-01  | 4.46E-02 | 1.31E-12 |
| rs573455    | A | G | 5.39E-01 | -1.99E-01 | 3.03E-02 | 4.77E-11 |
| rs11222084  | A | T | 3.62E-01 | 3.36E-01  | 3.16E-02 | 1.80E-26 |
| rs10750441  | C | T | 6.62E-01 | 1.75E-01  | 3.19E-02 | 3.74E-08 |
| rs78998485  | C | G | 2.56E-01 | 2.45E-01  | 3.46E-02 | 1.48E-12 |
| rs3819532   | T | C | 6.09E-01 | 1.88E-01  | 3.06E-02 | 9.44E-10 |
| rs2024385   | T | A | 4.24E-01 | -2.64E-01 | 3.06E-02 | 5.88E-18 |
| rs1010064   | A | C | 1.84E-01 | -3.57E-01 | 3.87E-02 | 3.02E-20 |
| rs73075659  | A | G | 3.35E-01 | -3.96E-01 | 3.21E-02 | 5.52E-35 |
| rs2129869   | A | T | 2.22E-01 | 2.64E-01  | 3.61E-02 | 2.44E-13 |
| rs9651825   | A | G | 2.71E-01 | 2.04E-01  | 3.40E-02 | 1.93E-09 |
| rs61917655  | C | T | 1.01E-01 | 3.43E-01  | 5.14E-02 | 2.68E-11 |
| rs12426261  | A | G | 6.21E-01 | -3.78E-01 | 3.09E-02 | 2.31E-34 |
| rs7134440   | C | T | 8.22E-02 | 4.79E-01  | 5.62E-02 | 1.58E-17 |
| rs7134677   | C | T | 2.98E-01 | -3.85E-01 | 3.32E-02 | 4.46E-31 |
| rs7306710   | T | C | 5.19E-01 | 2.43E-01  | 3.03E-02 | 1.02E-15 |
| rs4143175   | T | C | 7.59E-01 | -2.19E-01 | 3.52E-02 | 5.10E-10 |
| rs7963801   | T | C | 5.78E-01 | 2.36E-01  | 3.11E-02 | 2.87E-14 |
| rs7980644   | A | G | 8.33E-01 | -2.64E-01 | 4.04E-02 | 6.30E-11 |
| rs17249754  | G | A | 1.68E-01 | -8.45E-01 | 4.03E-02 | 1.25E-97 |
| rs10777213  | G | A | 5.24E-01 | -1.79E-01 | 2.99E-02 | 2.45E-09 |
| rs5742643   | T | C | 7.51E-01 | 2.23E-01  | 3.49E-02 | 1.53E-10 |
| rs7310615   | C | G | 5.18E-01 | -5.85E-01 | 3.06E-02 | 1.32E-81 |
| rs1896326   | G | A | 2.29E-01 | -2.80E-01 | 3.71E-02 | 4.40E-14 |
| rs35444     | A | G | 3.86E-01 | -4.37E-01 | 3.10E-02 | 3.47E-45 |
| rs6490019   | A | G | 6.20E-01 | 2.90E-01  | 3.09E-02 | 6.61E-21 |
| rs1169078   | C | G | 3.12E-01 | 1.97E-01  | 3.27E-02 | 1.68E-09 |
| rs117206641 | C | T | 1.11E-01 | 3.15E-01  | 4.99E-02 | 2.66E-10 |
| rs483071    | C | T | 6.25E-01 | 2.71E-01  | 3.13E-02 | 5.09E-18 |
| rs9507885   | C | T | 9.53E-02 | -3.21E-01 | 5.42E-02 | 3.23E-09 |
| rs9508495   | C | T | 7.57E-01 | -3.56E-01 | 3.53E-02 | 6.34E-24 |
| rs2065498   | T | G | 8.29E-01 | 2.93E-01  | 4.03E-02 | 3.36E-13 |
| rs7491248   | G | A | 2.24E-01 | 2.16E-01  | 3.62E-02 | 2.37E-09 |
| rs9526707   | G | A | 3.22E-01 | -2.04E-01 | 3.23E-02 | 2.77E-10 |
| rs75961402  | G | A | 1.53E-01 | 2.66E-01  | 4.18E-02 | 1.95E-10 |
| rs17245822  | A | C | 3.73E-01 | 1.90E-01  | 3.12E-02 | 1.15E-09 |
| rs78474310  | A | G | 4.48E-02 | 4.70E-01  | 7.34E-02 | 1.51E-10 |
| rs6562778   | A | G | 5.41E-01 | -1.78E-01 | 3.04E-02 | 4.95E-09 |
| rs9549627   | G | A | 1.18E-01 | 2.85E-01  | 5.00E-02 | 1.25E-08 |
| rs7331680   | G | T | 1.49E-01 | 4.10E-01  | 4.23E-02 | 3.35E-22 |
| rs365990    | A | G | 3.66E-01 | -2.25E-01 | 3.12E-02 | 5.95E-13 |
| rs8904      | G | A | 3.68E-01 | 3.06E-01  | 3.14E-02 | 1.71E-22 |
| rs7493678   | A | T | 3.49E-01 | 1.89E-01  | 3.16E-02 | 2.31E-09 |
| rs72683923  | T | C | 2.12E-02 | -9.59E-01 | 1.10E-01 | 3.08E-18 |
| rs35413927  | A | G | 3.05E-01 | 3.00E-01  | 3.28E-02 | 5.25E-20 |
| rs57140819  | C | G | 1.73E-01 | -2.42E-01 | 3.98E-02 | 1.30E-09 |
| rs11847049  | C | G | 2.17E-01 | 2.27E-01  | 3.64E-02 | 4.44E-10 |
| rs11159091  | G | A | 4.62E-01 | 1.98E-01  | 3.03E-02 | 6.79E-11 |

|             |   |   |          |           |          |          |
|-------------|---|---|----------|-----------|----------|----------|
| rs7154723   | G | A | 3.85E-01 | 2.53E-01  | 3.09E-02 | 2.72E-16 |
| rs17562391  | C | T | 4.19E-01 | 1.97E-01  | 3.06E-02 | 1.35E-10 |
| rs75016974  | C | T | 1.42E-01 | -2.51E-01 | 4.39E-02 | 1.05E-08 |
| rs12885878  | A | G | 7.66E-01 | 2.29E-01  | 3.67E-02 | 4.32E-10 |
| rs8030856   | C | G | 3.95E-01 | 1.76E-01  | 3.10E-02 | 1.21E-08 |
| rs28866311  | T | G | 4.74E-01 | 2.76E-01  | 3.02E-02 | 5.45E-20 |
| rs4775769   | T | G | 9.06E-01 | 4.16E-01  | 5.17E-02 | 7.76E-16 |
| rs3098186   | C | T | 5.16E-01 | -2.42E-01 | 3.03E-02 | 1.41E-15 |
| rs2652812   | C | T | 7.54E-01 | -2.52E-01 | 3.53E-02 | 1.03E-12 |
| rs28429256  | G | A | 3.34E-01 | 2.15E-01  | 3.25E-02 | 3.89E-11 |
| rs11636952  | T | C | 6.86E-01 | -5.31E-01 | 3.28E-02 | 4.22E-59 |
| rs2627313   | C | T | 4.45E-01 | 3.21E-01  | 3.03E-02 | 3.55E-26 |
| rs2046341   | G | A | 1.92E-01 | -2.54E-01 | 3.82E-02 | 2.74E-11 |
| rs77032376  | C | T | 1.49E-01 | -2.73E-01 | 4.30E-02 | 2.35E-10 |
| rs4932373   | A | C | 3.26E-01 | 6.35E-01  | 3.28E-02 | 2.49E-83 |
| rs12906962  | T | C | 3.24E-01 | 2.65E-01  | 3.25E-02 | 3.28E-16 |
| rs2589218   | T | C | 2.70E-01 | 2.26E-01  | 3.39E-02 | 2.54E-11 |
| rs4606697   | G | A | 1.04E-01 | -3.20E-01 | 5.23E-02 | 9.71E-10 |
| rs11641374  | C | A | 6.00E-01 | -1.94E-01 | 3.09E-02 | 3.26E-10 |
| rs12596630  | C | T | 9.03E-02 | 4.28E-01  | 5.47E-02 | 5.01E-15 |
| rs72778133  | T | C | 1.42E-01 | 2.42E-01  | 4.43E-02 | 4.97E-08 |
| rs2283500   | A | C | 1.10E-01 | -3.11E-01 | 4.81E-02 | 1.08E-10 |
| rs1049212   | A | G | 5.69E-01 | 2.99E-01  | 3.02E-02 | 4.59E-23 |
| rs77924615  | G | A | 1.99E-01 | -4.08E-01 | 3.90E-02 | 1.12E-25 |
| rs7186298   | C | T | 4.30E-01 | -2.32E-01 | 3.02E-02 | 1.88E-14 |
| rs8044992   | T | C | 2.88E-01 | -2.14E-01 | 3.31E-02 | 1.07E-10 |
| rs34941092  | G | A | 1.50E-01 | -3.23E-01 | 4.25E-02 | 3.23E-14 |
| rs4784541   | T | C | 5.25E-01 | 2.02E-01  | 3.07E-02 | 4.93E-11 |
| rs2060664   | T | C | 2.52E-01 | -2.16E-01 | 3.45E-02 | 4.06E-10 |
| rs146550789 | T | C | 4.17E-02 | 4.82E-01  | 7.78E-02 | 5.64E-10 |
| rs62047964  | C | T | 6.22E-02 | 5.12E-01  | 6.86E-02 | 9.29E-14 |
| rs1012089   | C | G | 5.25E-01 | 1.92E-01  | 3.02E-02 | 1.95E-10 |
| rs4888408   | G | A | 5.86E-01 | 3.65E-01  | 3.07E-02 | 1.42E-32 |
| rs12926550  | G | A | 3.16E-01 | -2.55E-01 | 3.24E-02 | 3.43E-15 |
| rs3950627   | C | A | 5.31E-01 | 1.85E-01  | 3.08E-02 | 1.82E-09 |
| rs6540119   | A | T | 6.66E-01 | -2.02E-01 | 3.22E-02 | 3.93E-10 |
| rs908951    | C | T | 4.38E-01 | -2.26E-01 | 3.15E-02 | 7.14E-13 |
| rs9303175   | T | G | 6.54E-01 | 2.05E-01  | 3.27E-02 | 3.65E-10 |
| rs11653927  | C | T | 3.85E-01 | -2.80E-01 | 3.08E-02 | 1.17E-19 |
| rs113086489 | C | T | 5.53E-01 | 3.25E-01  | 3.07E-02 | 3.80E-26 |
| rs4511593   | C | T | 6.53E-01 | -2.88E-01 | 3.18E-02 | 1.28E-19 |
| rs117285318 | T | C | 7.75E-02 | -4.41E-01 | 5.89E-02 | 6.93E-14 |
| rs4925159   | G | A | 4.25E-01 | 2.17E-01  | 3.05E-02 | 9.66E-13 |
| rs7218708   | A | G | 5.17E-01 | 1.78E-01  | 3.03E-02 | 4.38E-09 |
| rs1551355   | C | T | 2.33E-01 | 2.10E-01  | 3.56E-02 | 3.89E-09 |
| rs9899540   | A | T | 6.00E-01 | -2.01E-01 | 3.16E-02 | 1.87E-10 |
| rs7213273   | G | A | 6.55E-01 | -4.00E-01 | 3.15E-02 | 6.24E-37 |
| rs17608766  | T | C | 1.45E-01 | 6.90E-01  | 4.33E-02 | 2.48E-57 |
| rs3764400   | T | C | 1.37E-01 | -3.75E-01 | 4.45E-02 | 3.69E-17 |
| rs9897429   | G | A | 5.20E-01 | 2.65E-01  | 3.19E-02 | 1.19E-16 |
| rs1000423   | C | T | 7.32E-01 | 4.14E-01  | 3.46E-02 | 6.50E-33 |
| rs56288724  | A | G | 4.17E-01 | 2.18E-01  | 3.10E-02 | 2.01E-12 |
| rs62076622  | A | G | 1.99E-01 | -2.36E-01 | 3.77E-02 | 3.79E-10 |
| rs6504213   | T | C | 5.82E-01 | 2.98E-01  | 3.12E-02 | 1.25E-21 |
| rs1436138   | A | G | 3.63E-01 | -3.12E-01 | 3.15E-02 | 4.73E-23 |
| rs9302885   | A | G | 5.55E-01 | -2.24E-01 | 3.02E-02 | 1.03E-13 |
| rs11655604  | C | T | 3.58E-01 | -2.03E-01 | 3.33E-02 | 1.09E-09 |
| rs34413141  | T | A | 1.82E-01 | -3.53E-01 | 3.93E-02 | 2.47E-19 |

|             |   |   |          |           |          |          |
|-------------|---|---|----------|-----------|----------|----------|
| rs62082230  | T | A | 2.77E-01 | -1.88E-01 | 3.45E-02 | 4.69E-08 |
| rs1154214   | T | G | 6.04E-01 | 2.03E-01  | 3.06E-02 | 3.27E-11 |
| rs56407827  | C | T | 2.69E-01 | 3.60E-01  | 3.40E-02 | 2.78E-26 |
| rs11874246  | C | T | 2.96E-01 | 2.86E-01  | 3.28E-02 | 3.22E-18 |
| rs7245140   | T | C | 1.80E-01 | 3.37E-01  | 3.91E-02 | 7.67E-18 |
| rs1437649   | G | A | 2.35E-01 | -2.19E-01 | 3.57E-02 | 8.57E-10 |
| rs665445    | C | A | 2.79E-01 | -1.91E-01 | 3.34E-02 | 1.15E-08 |
| rs10048404  | C | T | 3.70E-01 | -2.61E-01 | 3.17E-02 | 1.91E-16 |
| rs10460108  | A | G | 5.20E-01 | -2.14E-01 | 3.01E-02 | 1.12E-12 |
| rs141958336 | G | A | 4.30E-02 | 7.81E-01  | 7.80E-02 | 1.36E-23 |
| rs12610654  | A | G | 3.44E-01 | -2.32E-01 | 3.20E-02 | 4.41E-13 |
| rs12978472  | C | G | 1.24E-01 | -8.45E-01 | 4.90E-02 | 1.23E-66 |
| rs8105174   | C | T | 1.82E-01 | -2.37E-01 | 3.98E-02 | 2.43E-09 |
| rs2291516   | G | A | 1.03E-01 | 3.71E-01  | 5.05E-02 | 2.17E-13 |
| rs34518929  | G | A | 2.62E-01 | -2.20E-01 | 3.45E-02 | 1.79E-10 |
| rs1848994   | G | A | 2.83E-01 | 2.01E-01  | 3.34E-02 | 1.79E-09 |
| rs73040775  | C | T | 6.41E-02 | -3.39E-01 | 6.19E-02 | 4.49E-08 |
| rs28572357  | A | C | 3.98E-01 | 2.73E-01  | 3.08E-02 | 6.34E-19 |
| rs1433121   | C | T | 6.91E-01 | -2.28E-01 | 3.26E-02 | 2.66E-12 |
| rs10420519  | G | T | 3.47E-02 | -4.92E-01 | 8.87E-02 | 2.86E-08 |
| rs7255933   | G | A | 2.57E-01 | 2.31E-01  | 3.45E-02 | 2.44E-11 |
| rs11672660  | C | T | 2.00E-01 | 2.21E-01  | 3.81E-02 | 6.32E-09 |
| rs571689    | C | T | 5.20E-01 | 2.28E-01  | 3.04E-02 | 6.77E-14 |
| rs73046792  | G | A | 1.59E-01 | -3.55E-01 | 4.26E-02 | 7.23E-17 |
| rs6054139   | G | A | 6.06E-01 | 2.09E-01  | 3.06E-02 | 8.23E-12 |
| rs2423514   | A | G | 4.59E-01 | -3.01E-01 | 3.02E-02 | 1.77E-23 |
| rs6108787   | T | G | 4.70E-01 | 4.27E-01  | 3.00E-02 | 5.38E-46 |
| rs6078093   | G | A | 4.28E-01 | -1.85E-01 | 3.04E-02 | 1.20E-09 |
| rs8125763   | C | A | 4.72E-01 | 1.76E-01  | 3.01E-02 | 4.84E-09 |
| rs17812022  | C | T | 9.58E-02 | -3.61E-01 | 5.25E-02 | 5.65E-12 |
| rs6058088   | T | G | 1.56E-01 | -2.83E-01 | 4.17E-02 | 1.14E-11 |
| rs79384779  | C | T | 1.51E-01 | 3.18E-01  | 4.28E-02 | 1.08E-13 |
| rs6029756   | G | A | 3.23E-01 | -2.71E-01 | 3.30E-02 | 1.88E-16 |
| rs6031431   | A | G | 4.62E-01 | 2.62E-01  | 3.04E-02 | 7.05E-18 |
| rs2598      | A | G | 4.67E-01 | -1.68E-01 | 3.03E-02 | 2.87E-08 |
| rs6090907   | G | A | 1.47E-01 | -3.85E-01 | 4.25E-02 | 1.29E-19 |
| rs2801008   | T | G | 3.18E-01 | 1.88E-01  | 3.24E-02 | 7.37E-09 |
| rs6026578   | C | G | 6.27E-01 | 1.85E-01  | 3.16E-02 | 4.59E-09 |
| rs6026744   | A | T | 1.23E-01 | 7.13E-01  | 4.61E-02 | 7.00E-54 |
| rs6062324   | G | A | 2.36E-01 | -3.29E-01 | 3.63E-02 | 1.18E-19 |
| rs2776037   | T | C | 5.85E-01 | 1.85E-01  | 3.09E-02 | 2.15E-09 |
| rs1882961   | C | T | 3.09E-01 | 2.44E-01  | 3.26E-02 | 6.69E-14 |
| rs2833834   | C | A | 2.77E-01 | 2.18E-01  | 3.38E-02 | 1.22E-10 |
| rs12627651  | G | A | 2.87E-01 | 3.50E-01  | 3.41E-02 | 1.02E-24 |
| rs34487963  | C | A | 1.85E-02 | -8.82E-01 | 1.24E-01 | 1.35E-12 |
| rs7278003   | T | C | 5.62E-01 | 1.88E-01  | 3.04E-02 | 6.63E-10 |
| rs2238787   | G | A | 2.92E-01 | 2.55E-01  | 3.32E-02 | 1.45E-14 |
| rs12321     | G | C | 4.33E-01 | -2.29E-01 | 3.03E-02 | 3.81E-14 |
| rs113264678 | C | T | 4.60E-02 | 4.06E-01  | 7.27E-02 | 2.26E-08 |
| rs8142376   | C | T | 4.91E-01 | 1.68E-01  | 3.00E-02 | 2.19E-08 |
| rs148140538 | C | T | 8.08E-02 | -3.25E-01 | 5.62E-02 | 7.39E-09 |
| rs28578714  | T | C | 3.94E-01 | -2.07E-01 | 3.27E-02 | 2.53E-10 |

---

**Supplementary Table S13: Genome-wide significant independent SNPs for coffee**

| <b>SNP</b>  | <b>effect</b> | <b>alle</b> | <b>other</b> | <b>alle</b> | <b>eaf</b> | <b>beta</b> | <b>se</b> | <b>pval</b> |
|-------------|---------------|-------------|--------------|-------------|------------|-------------|-----------|-------------|
| rs4615895   | G             |             | A            |             | 7.41E-01   | 1.22E-02    | 1.85E-03  | 4.20E-11    |
| rs516636    | C             |             | A            |             | 2.09E-01   | 1.17E-02    | 1.98E-03  | 4.00E-09    |
| rs13387939  | C             |             | A            |             | 8.28E-01   | 1.66E-02    | 2.14E-03  | 9.80E-15    |
| rs780093    | T             |             | C            |             | 6.16E-01   | 1.33E-02    | 1.66E-03  | 1.00E-15    |
| rs12989746  | G             |             | T            |             | 2.50E-01   | 1.04E-02    | 1.86E-03  | 2.80E-08    |
| rs1527961   | T             |             | C            |             | 1.35E-01   | -1.33E-02   | 2.37E-03  | 1.70E-08    |
| rs2597805   | C             |             | T            |             | 6.82E-01   | 9.86E-03    | 1.76E-03  | 2.00E-08    |
| rs2189234   | T             |             | G            |             | 6.18E-01   | 9.99E-03    | 1.66E-03  | 1.80E-09    |
| rs12514566  | G             |             | A            |             | 3.37E-01   | -1.14E-02   | 1.71E-03  | 2.40E-11    |
| rs13163336  | C             |             | A            |             | 1.58E-01   | 1.49E-02    | 2.21E-03  | 1.30E-11    |
| rs2465037   | C             |             | A            |             | 3.43E-01   | -1.06E-02   | 1.71E-03  | 4.80E-10    |
| rs1338549   | T             |             | G            |             | 5.34E-01   | -9.45E-03   | 1.62E-03  | 5.60E-09    |
| rs9398171   | C             |             | T            |             | 7.11E-01   | 1.09E-02    | 1.78E-03  | 1.10E-09    |
| rs4410790   | T             |             | C            |             | 6.32E-01   | 3.91E-02    | 1.67E-03  | 1.20E-120   |
| rs73075167  | A             |             | T            |             | 1.29E-01   | -1.61E-02   | 2.44E-03  | 5.00E-11    |
| rs7811609   | C             |             | T            |             | 3.75E-01   | 9.14E-03    | 1.66E-03  | 4.00E-08    |
| rs34060476  | A             |             | G            |             | 1.34E-01   | 1.84E-02    | 2.37E-03  | 7.50E-15    |
| rs1057868   | C             |             | T            |             | 2.85E-01   | 2.00E-02    | 1.79E-03  | 5.40E-29    |
| rs78267637  | C             |             | G            |             | 3.81E-02   | -2.54E-02   | 4.32E-03  | 3.90E-09    |
| rs442355    | G             |             | C            |             | 2.54E-01   | -1.11E-02   | 1.85E-03  | 1.90E-09    |
| rs6469262   | T             |             | C            |             | 5.65E-01   | -9.15E-03   | 1.63E-03  | 1.90E-08    |
| rs10119174  | G             |             | C            |             | 5.71E-01   | -9.40E-03   | 1.64E-03  | 1.00E-08    |
| rs117810762 | G             |             | A            |             | 1.79E-02   | 3.59E-02    | 6.18E-03  | 6.20E-09    |
| rs61928609  | A             |             | C            |             | 8.35E-01   | -1.47E-02   | 2.18E-03  | 1.30E-11    |
| rs2472297   | C             |             | T            |             | 2.63E-01   | 4.65E-02    | 1.83E-03  | 1.10E-142   |
| rs117968677 | G             |             | A            |             | 2.42E-02   | -3.10E-02   | 5.52E-03  | 1.90E-08    |
| rs1421085   | T             |             | C            |             | 4.04E-01   | 1.85E-02    | 1.64E-03  | 1.70E-29    |
| rs8056750   | C             |             | T            |             | 3.59E-01   | 1.05E-02    | 1.74E-03  | 1.30E-09    |
| rs7224815   | A             |             | T            |             | 4.08E-01   | -1.09E-02   | 1.64E-03  | 3.70E-11    |
| rs62064918  | C             |             | T            |             | 2.45E-01   | -1.03E-02   | 1.88E-03  | 4.10E-08    |
| rs57918684  | G             |             | A            |             | 1.55E-01   | 1.29E-02    | 2.24E-03  | 8.60E-09    |
| rs630194    | T             |             | C            |             | 3.43E-01   | -1.14E-02   | 1.70E-03  | 2.30E-11    |
| rs1942965   | T             |             | C            |             | 5.05E-01   | -8.90E-03   | 1.62E-03  | 3.80E-08    |
| rs476828    | T             |             | C            |             | 2.37E-01   | 1.73E-02    | 1.90E-03  | 5.60E-20    |
| rs75347775  | G             |             | A            |             | 2.45E-01   | 1.05E-02    | 1.88E-03  | 2.70E-08    |
| rs56113850  | T             |             | C            |             | 5.78E-01   | 1.27E-02    | 1.63E-03  | 8.90E-15    |
| rs6063085   | A             |             | C            |             | 3.73E-01   | 1.04E-02    | 1.67E-03  | 4.50E-10    |
| rs6062682   | C             |             | T            |             | 4.65E-01   | 1.04E-02    | 1.64E-03  | 2.50E-10    |
| rs17842490  | A             |             | G            |             | 1.42E-02   | -4.52E-02   | 6.81E-03  | 3.30E-11    |
| rs13054099  | T             |             | C            |             | 2.61E-01   | -1.08E-02   | 1.84E-03  | 4.30E-09    |

**Supplementary Table S14: Genome-wide significant independent SNPs for cholesterol**

| SNP         | effect | alle | other | alle | eaf      | beta      | se       | pval      |
|-------------|--------|------|-------|------|----------|-----------|----------|-----------|
| rs11591147  | G      |      | T     |      | 9.83E-01 | 4.76E-02  | 3.03E-03 | 1.87E-55  |
| rs472495    | G      |      | T     |      | 3.49E-01 | -6.42E-03 | 8.35E-04 | 1.61E-14  |
| rs7534572   | C      |      | G     |      | 3.54E-01 | -8.12E-03 | 8.32E-04 | 1.72E-22  |
| rs12740374  | G      |      | T     |      | 7.78E-01 | 1.83E-02  | 9.57E-04 | 1.38E-81  |
| rs11580878  | A      |      | G     |      | 5.03E-01 | 5.14E-03  | 8.16E-04 | 2.94E-10  |
| rs1367117   | G      |      | A     |      | 6.61E-01 | -1.56E-02 | 8.40E-04 | 1.53E-76  |
| rs1260326   | T      |      | C     |      | 3.93E-01 | 1.02E-02  | 8.14E-04 | 3.17E-36  |
| rs4299376   | G      |      | T     |      | 3.23E-01 | 1.11E-02  | 8.51E-04 | 3.82E-39  |
| rs12471811  | A      |      | T     |      | 8.93E-01 | -8.48E-03 | 1.30E-03 | 5.96E-11  |
| rs10804330  | T      |      | C     |      | 5.70E-01 | 5.02E-03  | 8.10E-04 | 5.99E-10  |
| rs58691354  | C      |      | T     |      | 8.44E-01 | -7.48E-03 | 1.11E-03 | 1.48E-11  |
| rs59950280  | G      |      | A     |      | 6.69E-01 | -5.83E-03 | 8.56E-04 | 1.01E-11  |
| rs34707604  | T      |      | C     |      | 7.43E-01 | -5.85E-03 | 9.56E-04 | 9.24E-10  |
| rs12916     | T      |      | C     |      | 5.99E-01 | -1.05E-02 | 8.12E-04 | 4.01E-38  |
| rs4704727   | T      |      | G     |      | 3.40E-01 | -7.49E-03 | 8.41E-04 | 5.23E-19  |
| rs2237107   | C      |      | G     |      | 7.96E-01 | 7.02E-03  | 9.87E-04 | 1.19E-12  |
| rs622871    | A      |      | G     |      | 3.14E-01 | -6.51E-03 | 8.58E-04 | 3.39E-14  |
| rs6458349   | G      |      | A     |      | 2.77E-01 | -5.66E-03 | 8.90E-04 | 2.10E-10  |
| rs9376091   | C      |      | T     |      | 7.38E-01 | 5.30E-03  | 9.10E-04 | 5.72E-09  |
| rs456598    | G      |      | A     |      | 8.58E-01 | -6.57E-03 | 1.14E-03 | 8.66E-09  |
| rs117733303 | A      |      | G     |      | 9.81E-01 | -3.12E-02 | 2.94E-03 | 2.99E-26  |
| rs74617384  | A      |      | T     |      | 9.19E-01 | -1.90E-02 | 1.46E-03 | 6.37E-39  |
| rs4470903   | C      |      | G     |      | 7.82E-01 | -6.70E-03 | 9.66E-04 | 3.85E-12  |
| rs10260606  | G      |      | C     |      | 8.18E-01 | -7.70E-03 | 1.03E-03 | 7.52E-14  |
| rs799157    | T      |      | C     |      | 4.34E-02 | 1.08E-02  | 1.95E-03 | 3.16E-08  |
| rs3918226   | C      |      | T     |      | 9.18E-01 | -8.18E-03 | 1.48E-03 | 2.99E-08  |
| rs7012637   | G      |      | A     |      | 5.25E-01 | -4.80E-03 | 8.03E-04 | 2.30E-09  |
| rs57180587  | A      |      | T     |      | 8.54E-01 | -8.16E-03 | 1.12E-03 | 3.89E-13  |
| rs10096633  | C      |      | T     |      | 8.77E-01 | 8.98E-03  | 1.21E-03 | 1.09E-13  |
| rs10504255  | G      |      | A     |      | 3.38E-01 | 5.68E-03  | 8.42E-04 | 1.57E-11  |
| rs28601761  | C      |      | G     |      | 5.78E-01 | 1.41E-02  | 8.16E-04 | 1.04E-66  |
| rs1883025   | C      |      | T     |      | 7.47E-01 | 6.98E-03  | 9.16E-04 | 2.42E-14  |
| rs635634    | C      |      | T     |      | 8.14E-01 | -9.88E-03 | 1.03E-03 | 6.94E-22  |
| rs56299331  | C      |      | T     |      | 7.98E-01 | -5.73E-03 | 9.91E-04 | 7.55E-09  |
| rs964184    | G      |      | C     |      | 1.32E-01 | 2.16E-02  | 1.17E-03 | 2.60E-75  |
| rs2244608   | A      |      | G     |      | 6.85E-01 | -7.02E-03 | 8.57E-04 | 2.50E-16  |
| rs1601935   | G      |      | T     |      | 3.45E-01 | 6.14E-03  | 8.43E-04 | 3.28E-13  |
| rs73534263  | A      |      | G     |      | 8.93E-01 | -7.18E-03 | 1.30E-03 | 2.94E-08  |
| rs34042070  | C      |      | G     |      | 8.14E-01 | -9.44E-03 | 1.03E-03 | 3.53E-20  |
| rs7213086   | C      |      | G     |      | 4.47E-01 | -4.78E-03 | 8.01E-04 | 2.43E-09  |
| rs77542162  | A      |      | G     |      | 9.77E-01 | -2.54E-02 | 2.66E-03 | 1.51E-21  |
| rs2125345   | T      |      | C     |      | 7.06E-01 | 5.64E-03  | 8.75E-04 | 1.19E-10  |
| rs6511720   | G      |      | T     |      | 8.81E-01 | 2.61E-02  | 1.23E-03 | 2.77E-100 |
| rs2738447   | A      |      | C     |      | 4.08E-01 | -8.17E-03 | 8.11E-04 | 7.37E-24  |
| rs58542926  | C      |      | T     |      | 9.24E-01 | 1.46E-02  | 1.51E-03 | 2.40E-22  |
| rs28807203  | A      |      | C     |      | 9.51E-01 | 1.07E-02  | 1.85E-03 | 7.97E-09  |
| rs10410835  | T      |      | C     |      | 4.76E-01 | -7.11E-03 | 8.07E-04 | 1.25E-18  |
| rs112019714 | T      |      | C     |      | 9.72E-01 | -2.52E-02 | 2.42E-03 | 2.06E-25  |
| rs7412      | C      |      | T     |      | 9.19E-01 | 3.74E-02  | 1.46E-03 | 4.73E-145 |
| rs2618567   | G      |      | T     |      | 3.41E-01 | 4.75E-03  | 8.40E-04 | 1.56E-08  |
| rs1883711   | G      |      | C     |      | 9.69E-01 | -2.41E-02 | 2.33E-03 | 4.52E-25  |
| rs6090040   | A      |      | C     |      | 4.80E-01 | 5.58E-03  | 8.01E-04 | 3.21E-12  |

**Supplementary Table S15: Genome-wide significant independent SNPs for triglyceride**

| <b>SNP</b> | <b>effect</b> | <b>_alle</b> | <b>other</b> | <b>_alle</b> | <b>beta</b> | <b>se</b> | <b>pval</b> |
|------------|---------------|--------------|--------------|--------------|-------------|-----------|-------------|
| rs2250802  | A             |              | G            |              | 2.30E-02    | 3.70E-03  | 5.09E-10    |
| rs1781930  | G             |              | A            |              | 3.14E-02    | 4.30E-03  | 2.83E-13    |
| rs7897379  | T             |              | C            |              | 2.74E-02    | 3.30E-03  | 1.01E-16    |
| rs2068888  | G             |              | A            |              | 2.41E-02    | 3.40E-03  | 1.36E-12    |
| rs11820504 | C             |              | T            |              | 6.04E-02    | 4.40E-03  | 6.97E-43    |
| rs10790162 | A             |              | G            |              | 2.31E-01    | 6.50E-03  | 1.93E-275   |
| rs10501321 | T             |              | C            |              | 2.16E-02    | 3.50E-03  | 6.77E-10    |
| rs174535   | C             |              | T            |              | 4.70E-02    | 3.40E-03  | 1.84E-43    |
| rs11057408 | G             |              | T            |              | 2.58E-02    | 3.50E-03  | 1.69E-13    |
| rs1321257  | G             |              | A            |              | 4.02E-02    | 3.40E-03  | 2.95E-32    |
| rs11613352 | C             |              | T            |              | 2.80E-02    | 3.90E-03  | 7.00E-13    |
| rs12748152 | T             |              | C            |              | 3.72E-02    | 5.90E-03  | 2.88E-10    |
| rs17513135 | T             |              | C            |              | 2.20E-02    | 3.90E-03  | 1.69E-08    |
| rs492571   | C             |              | T            |              | 7.99E-02    | 8.80E-03  | 1.09E-19    |
| rs2043085  | T             |              | C            |              | 3.27E-02    | 3.40E-03  | 6.74E-22    |
| rs588136   | C             |              | T            |              | 4.95E-02    | 4.10E-03  | 1.46E-33    |
| rs3198697  | C             |              | T            |              | 1.98E-02    | 3.40E-03  | 5.76E-09    |
| rs4587594  | G             |              | A            |              | 6.94E-02    | 3.50E-03  | 1.69E-87    |
| rs749671   | G             |              | A            |              | 2.11E-02    | 3.40E-03  | 5.44E-10    |
| rs1800775  | C             |              | A            |              | 3.96E-02    | 3.50E-03  | 1.12E-29    |
| rs8077889  | C             |              | A            |              | 2.52E-02    | 4.20E-03  | 1.97E-09    |
| rs10401969 | T             |              | C            |              | 1.21E-01    | 6.50E-03  | 2.41E-77    |
| rs731839   | G             |              | A            |              | 2.24E-02    | 3.60E-03  | 4.90E-10    |
| rs439401   | C             |              | T            |              | 6.59E-02    | 3.80E-03  | 2.26E-67    |
| rs3760627  | C             |              | T            |              | 1.89E-02    | 3.40E-03  | 2.72E-08    |
| rs10426094 | C             |              | T            |              | 2.41E-02    | 4.00E-03  | 1.69E-09    |
| rs4804311  | A             |              | G            |              | 3.92E-02    | 6.00E-03  | 6.43E-11    |
| rs6029143  | C             |              | T            |              | 3.88E-02    | 7.10E-03  | 4.63E-08    |
| rs4810479  | C             |              | T            |              | 4.74E-02    | 3.80E-03  | 1.04E-35    |
| rs13389219 | C             |              | T            |              | 2.71E-02    | 3.40E-03  | 1.58E-15    |
| rs676210   | G             |              | A            |              | 7.33E-02    | 3.90E-03  | 8.32E-79    |
| rs2972146  | T             |              | G            |              | 2.81E-02    | 3.40E-03  | 1.40E-16    |
| rs3761445  | A             |              | G            |              | 2.32E-02    | 3.40E-03  | 8.88E-12    |
| rs1260326  | T             |              | C            |              | 1.15E-01    | 3.40E-03  | 6.50E-250   |
| rs10440120 | C             |              | A            |              | 3.06E-02    | 4.40E-03  | 3.54E-12    |
| rs645040   | T             |              | G            |              | 2.93E-02    | 4.00E-03  | 2.39E-13    |
| rs6831256  | G             |              | A            |              | 2.58E-02    | 3.50E-03  | 1.69E-13    |
| rs442177   | T             |              | G            |              | 3.09E-02    | 3.30E-03  | 7.70E-21    |
| rs4704727  | G             |              | T            |              | 2.89E-02    | 3.50E-03  | 1.49E-16    |
| rs9686661  | T             |              | C            |              | 3.79E-02    | 4.40E-03  | 7.08E-18    |
| rs719726   | T             |              | C            |              | 1.99E-02    | 3.50E-03  | 1.30E-08    |
| rs634869   | T             |              | C            |              | 2.72E-02    | 3.30E-03  | 1.69E-16    |
| rs2665357  | C             |              | A            |              | 2.12E-02    | 3.30E-03  | 1.33E-10    |
| rs2251830  | C             |              | A            |              | 2.36E-02    | 3.60E-03  | 5.54E-11    |
| rs2247056  | C             |              | T            |              | 3.78E-02    | 3.90E-03  | 3.25E-22    |
| rs998584   | A             |              | C            |              | 2.93E-02    | 3.70E-03  | 2.40E-15    |
| rs38855    | A             |              | G            |              | 1.87E-02    | 3.30E-03  | 1.46E-08    |
| rs287621   | T             |              | C            |              | 2.22E-02    | 3.70E-03  | 1.97E-09    |
| rs4719841  | G             |              | A            |              | 2.32E-02    | 3.40E-03  | 8.88E-12    |
| rs714052   | A             |              | G            |              | 1.08E-01    | 5.00E-03  | 3.17E-104   |
| rs72555385 | G             |              | A            |              | 7.49E-02    | 1.24E-02  | 1.54E-09    |
| rs6995541  | G             |              | A            |              | 2.65E-02    | 3.70E-03  | 7.94E-13    |
| rs2954022  | C             |              | A            |              | 7.80E-02    | 3.30E-03  | 1.63E-123   |
| rs12676857 | C             |              | T            |              | 3.32E-02    | 4.60E-03  | 5.30E-13    |
| rs12679834 | T             |              | C            |              | 1.65E-01    | 5.40E-03  | 2.61E-204   |
| rs4738684  | A             |              | G            |              | 2.05E-02    | 3.50E-03  | 4.71E-09    |

**Supplementary Table S16: Genome-wide significant independent SNPs for fasting insulin**

| <b>SNP</b> | <b>effect</b> | <b>alle</b> | <b>other</b> | <b>alle</b> | <b>beta</b> | <b>se</b> | <b>pval</b> |
|------------|---------------|-------------|--------------|-------------|-------------|-----------|-------------|
| rs2820468  | A             |             | G            |             | 1.50E-02    | 3.40E-03  | 3.77E-06    |
| rs1260326  | T             |             | C            |             | 1.90E-02    | 3.20E-03  | 5.88E-09    |
| rs2943653  | C             |             | T            |             | 1.60E-02    | 3.30E-03  | 7.74E-07    |
| rs17035311 | A             |             | C            |             | -2.00E-02   | 4.30E-03  | 2.33E-06    |
| rs2820237  | G             |             | A            |             | 2.00E-02    | 3.90E-03  | 5.03E-07    |
| rs1368761  | G             |             | C            |             | -4.30E-02   | 9.40E-03  | 4.67E-06    |
| rs2237331  | C             |             | A            |             | -2.60E-02   | 5.60E-03  | 4.87E-06    |
| rs1167800  | G             |             | A            |             | 2.00E-02    | 3.60E-03  | 2.40E-08    |
| rs9987289  | A             |             | G            |             | -3.00E-02   | 5.00E-03  | 1.65E-09    |
| rs6474949  | G             |             | A            |             | -4.20E-02   | 7.60E-03  | 5.29E-08    |
| rs7903146  | C             |             | T            |             | -1.80E-02   | 3.60E-03  | 2.76E-07    |
| rs2114912  | G             |             | T            |             | 2.60E-02    | 4.10E-03  | 3.72E-10    |
| rs12913456 | T             |             | G            |             | -1.70E-02   | 3.60E-03  | 4.82E-06    |
| rs2109439  | C             |             | G            |             | 1.50E-02    | 3.20E-03  | 1.06E-06    |

**Supplementary Table S17: Genome-wide significant independent SNPs for insulin-like growth factor-1**

| SNP         | effect | alle | other | alle | eaf      | beta      | se       | pval      |
|-------------|--------|------|-------|------|----------|-----------|----------|-----------|
| rs115236209 | T      |      | G     |      | 6.63E-02 | 1.75E-01  | 2.68E-02 | 6.20E-11  |
| rs17037452  | A      |      | G     |      | 1.64E-01 | -1.18E-01 | 1.78E-02 | 3.75E-11  |
| rs11260930  | A      |      | G     |      | 4.74E-01 | -9.71E-02 | 1.33E-02 | 2.56E-13  |
| rs3218192   | G      |      | T     |      | 5.09E-01 | -7.79E-02 | 1.32E-02 | 3.37E-09  |
| rs4659406   | G      |      | A     |      | 6.92E-01 | -1.08E-01 | 1.43E-02 | 3.45E-14  |
| rs114165349 | G      |      | C     |      | 2.35E-02 | -5.86E-01 | 4.37E-02 | 6.07E-41  |
| rs569356    | A      |      | G     |      | 1.41E-01 | 1.49E-01  | 1.89E-02 | 3.13E-15  |
| rs61780434  | G      |      | A     |      | 2.20E-01 | -1.08E-01 | 1.59E-02 | 1.15E-11  |
| rs951740    | G      |      | A     |      | 6.23E-01 | -1.42E-01 | 1.36E-02 | 2.33E-25  |
| rs3762311   | T      |      | G     |      | 1.17E-01 | 1.52E-01  | 2.06E-02 | 1.68E-13  |
| rs9728077   | C      |      | A     |      | 6.68E-01 | -1.02E-01 | 1.41E-02 | 4.31E-13  |
| rs1430753   | A      |      | G     |      | 8.12E-01 | -1.01E-01 | 1.69E-02 | 2.11E-09  |
| rs78511209  | C      |      | G     |      | 9.49E-02 | 1.78E-01  | 2.26E-02 | 3.08E-15  |
| rs469773    | C      |      | T     |      | 1.98E-01 | 3.87E-01  | 1.66E-02 | 1.80E-120 |
| rs6603992   | A      |      | G     |      | 6.42E-01 | -8.96E-02 | 1.37E-02 | 6.22E-11  |
| rs599839    | G      |      | A     |      | 7.72E-01 | -1.65E-01 | 1.57E-02 | 6.06E-26  |
| rs571380164 | T      |      | C     |      | 5.02E-02 | 1.71E-01  | 3.08E-02 | 2.98E-08  |
| rs1127313   | G      |      | A     |      | 4.90E-01 | -1.28E-01 | 1.32E-02 | 2.57E-22  |
| rs12749024  | C      |      | T     |      | 1.52E-01 | 4.06E-01  | 1.87E-02 | 5.50E-105 |
| rs11577063  | T      |      | G     |      | 7.75E-01 | -1.03E-01 | 1.58E-02 | 5.45E-11  |
| rs7545345   | T      |      | C     |      | 1.31E-01 | 1.37E-01  | 1.95E-02 | 2.30E-12  |
| rs2724373   | C      |      | T     |      | 3.57E-01 | -1.03E-01 | 1.37E-02 | 8.13E-14  |
| rs55843942  | C      |      | G     |      | 1.28E-01 | -1.24E-01 | 1.97E-02 | 3.12E-10  |
| rs116509476 | T      |      | C     |      | 2.65E-02 | 2.80E-01  | 4.09E-02 | 7.46E-12  |
| rs17597773  | C      |      | G     |      | 2.45E-01 | -2.39E-01 | 1.53E-02 | 6.26E-55  |
| rs514230    | A      |      | T     |      | 5.18E-01 | 1.18E-01  | 1.32E-02 | 4.47E-19  |
| rs2802951   | A      |      | G     |      | 7.17E-01 | -8.93E-02 | 1.46E-02 | 1.07E-09  |
| rs7517340   | T      |      | C     |      | 8.18E-01 | 1.79E-01  | 1.71E-02 | 1.97E-25  |
| rs1562617   | G      |      | A     |      | 2.23E-01 | -1.05E-01 | 1.59E-02 | 3.92E-11  |
| rs10171272  | C      |      | A     |      | 3.05E-01 | 1.93E-01  | 1.44E-02 | 4.62E-41  |
| rs35628191  | C      |      | T     |      | 4.06E-01 | 7.79E-02  | 1.34E-02 | 6.70E-09  |
| rs1260326   | T      |      | C     |      | 6.07E-01 | 3.44E-01  | 1.35E-02 | 5.06E-144 |
| rs2568464   | T      |      | C     |      | 4.27E-01 | 7.83E-02  | 1.33E-02 | 4.56E-09  |
| rs10490051  | T      |      | C     |      | 3.07E-01 | 8.87E-02  | 1.44E-02 | 6.30E-10  |
| rs62136965  | T      |      | C     |      | 4.66E-02 | 2.18E-01  | 3.15E-02 | 5.15E-12  |
| rs6754136   | T      |      | C     |      | 2.43E-01 | -1.01E-01 | 1.54E-02 | 6.58E-11  |
| rs11545482  | C      |      | T     |      | 2.09E-02 | -4.90E-01 | 4.60E-02 | 1.92E-26  |
| rs4852306   | C      |      | T     |      | 6.11E-01 | 8.50E-02  | 1.35E-02 | 3.31E-10  |
| rs77704058  | C      |      | G     |      | 5.50E-02 | 1.66E-01  | 2.89E-02 | 9.77E-09  |
| rs4849187   | T      |      | C     |      | 2.73E-01 | 9.55E-02  | 1.49E-02 | 1.49E-10  |
| rs17050272  | G      |      | A     |      | 4.10E-01 | -1.17E-01 | 1.34E-02 | 2.61E-18  |
| rs1045832   | A      |      | G     |      | 4.09E-01 | -7.55E-02 | 1.34E-02 | 1.74E-08  |
| rs1806701   | C      |      | T     |      | 2.81E-01 | 8.06E-02  | 1.48E-02 | 4.94E-08  |
| rs17289223  | A      |      | T     |      | 3.88E-01 | 7.97E-02  | 1.35E-02 | 3.75E-09  |
| rs17400325  | T      |      | C     |      | 4.10E-02 | 2.95E-01  | 3.32E-02 | 7.29E-19  |
| rs57267144  | G      |      | C     |      | 2.65E-01 | -1.21E-01 | 1.50E-02 | 9.32E-16  |
| rs13418037  | C      |      | T     |      | 1.87E-01 | 1.02E-01  | 1.71E-02 | 2.14E-09  |
| rs62182127  | G      |      | A     |      | 5.63E-01 | 1.02E-01  | 1.33E-02 | 1.35E-14  |
| rs10498238  | C      |      | T     |      | 7.57E-02 | 1.74E-01  | 2.49E-02 | 2.37E-12  |
| rs1465529   | T      |      | C     |      | 3.00E-01 | -1.06E-01 | 1.44E-02 | 2.14E-13  |
| rs9288726   | T      |      | C     |      | 6.58E-01 | 9.14E-02  | 1.39E-02 | 4.85E-11  |
| rs346076    | C      |      | T     |      | 6.63E-01 | 7.93E-02  | 1.40E-02 | 1.33E-08  |
| rs2607748   | T      |      | C     |      | 4.37E-01 | 8.70E-02  | 1.33E-02 | 5.74E-11  |
| rs7374774   | T      |      | G     |      | 5.89E-01 | -7.85E-02 | 1.34E-02 | 4.46E-09  |
| rs4678732   | G      |      | A     |      | 3.74E-01 | 8.70E-02  | 1.36E-02 | 1.64E-10  |
| rs11928797  | C      |      | A     |      | 1.17E-01 | 1.53E-01  | 2.05E-02 | 7.72E-14  |

|             |   |   |          |           |          |           |
|-------------|---|---|----------|-----------|----------|-----------|
| rs6795296   | T | C | 1.31E-01 | 1.08E-01  | 1.95E-02 | 2.94E-08  |
| rs148710154 | T | C | 3.79E-01 | -1.04E-01 | 1.36E-02 | 1.89E-14  |
| rs112893170 | T | C | 1.95E-01 | -1.04E-01 | 1.67E-02 | 4.72E-10  |
| rs4858992   | T | C | 8.44E-01 | 1.50E-01  | 1.81E-02 | 1.63E-16  |
| rs9842522   | G | A | 3.91E-01 | -1.01E-01 | 1.35E-02 | 6.71E-14  |
| rs62280667  | T | C | 3.39E-01 | 1.58E-01  | 1.39E-02 | 7.40E-30  |
| rs115396404 | T | C | 1.80E-01 | -1.25E-01 | 1.73E-02 | 4.83E-13  |
| rs62265578  | T | C | 2.51E-01 | 9.02E-02  | 1.52E-02 | 3.25E-09  |
| rs687339    | C | T | 7.72E-01 | 2.15E-01  | 1.57E-02 | 1.92E-42  |
| rs1720827   | G | A | 7.72E-01 | 8.65E-02  | 1.57E-02 | 3.93E-08  |
| rs17487338  | G | A | 1.70E-01 | -1.61E-01 | 1.77E-02 | 8.81E-20  |
| rs7632381   | T | C | 4.47E-01 | -1.71E-01 | 1.32E-02 | 2.34E-38  |
| rs13073970  | G | T | 2.08E-01 | 1.27E-01  | 1.62E-02 | 5.43E-15  |
| rs572169    | C | T | 3.18E-01 | 3.11E-01  | 1.41E-02 | 2.52E-107 |
| rs232000    | A | G | 6.83E-01 | -7.98E-02 | 1.43E-02 | 2.65E-08  |
| rs2268829   | G | A | 7.86E-01 | -1.03E-01 | 1.61E-02 | 1.60E-10  |
| rs9879333   | G | A | 2.46E-01 | -1.04E-01 | 1.53E-02 | 1.06E-11  |
| rs59950280  | G | A | 3.31E-01 | -9.16E-02 | 1.42E-02 | 1.09E-10  |
| rs4234797   | G | A | 6.15E-01 | 2.04E-01  | 1.35E-02 | 1.90E-51  |
| rs17610727  | A | G | 2.82E-01 | 8.25E-02  | 1.47E-02 | 2.07E-08  |
| rs1055582   | C | T | 5.05E-01 | -1.40E-01 | 1.32E-02 | 2.18E-26  |
| rs7662792   | A | T | 6.62E-01 | -1.90E-01 | 1.39E-02 | 3.11E-42  |
| rs3775288   | A | G | 1.26E-01 | -1.65E-01 | 1.99E-02 | 9.81E-17  |
| rs34707604  | T | C | 2.61E-01 | -2.30E-01 | 1.58E-02 | 8.44E-48  |
| rs1349852   | A | C | 4.75E-01 | -1.38E-01 | 1.33E-02 | 3.86E-25  |
| rs55679357  | C | T | 1.80E-01 | 1.46E-01  | 1.73E-02 | 2.87E-17  |
| rs2204920   | A | G | 4.18E-01 | -8.64E-02 | 1.34E-02 | 1.04E-10  |
| rs6822348   | A | T | 6.98E-01 | 1.98E-01  | 1.44E-02 | 2.46E-43  |
| rs17429745  | G | T | 3.09E-01 | -1.37E-01 | 1.43E-02 | 1.31E-21  |
| rs3804174   | C | T | 3.14E-01 | 1.11E-01  | 1.44E-02 | 9.37E-15  |
| rs7658049   | T | G | 7.76E-01 | 9.29E-02  | 1.65E-02 | 1.78E-08  |
| rs10027182  | G | A | 7.44E-01 | 1.23E-01  | 1.51E-02 | 3.60E-16  |
| rs62334147  | T | C | 1.83E-01 | 1.03E-01  | 1.71E-02 | 1.74E-09  |
| rs4466086   | T | A | 5.78E-01 | 7.74E-02  | 1.34E-02 | 8.16E-09  |
| rs9292578   | C | A | 4.19E-02 | -2.13E-01 | 3.30E-02 | 1.05E-10  |
| rs55681913  | T | C | 1.07E-01 | 3.34E-01  | 2.16E-02 | 2.71E-54  |
| rs2548379   | G | A | 6.75E-01 | 1.23E-01  | 1.41E-02 | 2.83E-18  |
| rs7719168   | A | C | 1.13E-01 | 1.66E-01  | 2.09E-02 | 1.99E-15  |
| rs7702956   | C | T | 3.28E-01 | -1.97E-01 | 1.41E-02 | 1.36E-44  |
| rs80170948  | T | G | 4.31E-02 | 2.20E-01  | 3.39E-02 | 8.18E-11  |
| rs2227819   | C | T | 1.14E-01 | 1.20E-01  | 2.09E-02 | 8.21E-09  |
| rs586199    | G | A | 5.16E-01 | 7.63E-02  | 1.32E-02 | 7.12E-09  |
| rs13178887  | T | C | 3.87E-01 | -1.25E-01 | 1.35E-02 | 2.76E-20  |
| rs7730092   | G | T | 1.91E-01 | 1.10E-01  | 1.68E-02 | 5.70E-11  |
| rs26822     | A | G | 3.27E-01 | 8.70E-02  | 1.41E-02 | 6.25E-10  |
| rs12514947  | G | T | 1.66E-01 | -2.26E-01 | 1.77E-02 | 3.44E-37  |
| rs667668    | G | A | 4.33E-01 | -1.10E-01 | 1.33E-02 | 1.65E-16  |
| rs12659034  | C | T | 2.01E-01 | 2.11E-01  | 1.64E-02 | 9.83E-38  |
| rs11740242  | T | C | 4.22E-01 | -9.23E-02 | 1.40E-02 | 4.10E-11  |
| rs6888349   | C | A | 2.58E-01 | -8.42E-02 | 1.51E-02 | 2.28E-08  |
| rs31196     | C | A | 5.72E-01 | -7.28E-02 | 1.33E-02 | 4.52E-08  |
| rs4282339   | G | A | 2.07E-01 | -2.89E-01 | 1.62E-02 | 4.72E-71  |
| rs1351893   | T | A | 7.06E-02 | 1.57E-01  | 2.58E-02 | 1.28E-09  |
| rs17714046  | T | C | 4.66E-02 | 2.19E-01  | 3.12E-02 | 2.09E-12  |
| rs112859600 | G | A | 4.47E-02 | -2.02E-01 | 3.19E-02 | 2.68E-10  |
| rs12524950  | A | G | 2.94E-01 | 8.85E-02  | 1.45E-02 | 9.34E-10  |
| rs7756117   | G | A | 6.95E-01 | -1.93E-01 | 1.43E-02 | 1.56E-41  |
| rs9264669   | A | T | 5.73E-01 | 1.42E-01  | 1.35E-02 | 7.62E-26  |

|             |   |   |          |           |          |           |
|-------------|---|---|----------|-----------|----------|-----------|
| rs9272558   | A | G | 2.57E-01 | -1.49E-01 | 1.51E-02 | 4.45E-23  |
| rs928976    | C | T | 3.14E-01 | 7.86E-02  | 1.42E-02 | 3.09E-08  |
| rs259720    | G | T | 5.95E-01 | 8.57E-02  | 1.35E-02 | 2.03E-10  |
| rs998584    | C | A | 4.82E-01 | 1.07E-01  | 1.32E-02 | 5.56E-16  |
| rs6924225   | G | A | 1.64E-01 | -1.00E-01 | 1.78E-02 | 2.05E-08  |
| rs515304    | T | C | 5.71E-01 | 7.57E-02  | 1.38E-02 | 3.68E-08  |
| rs6940544   | G | A | 4.88E-01 | -1.54E-01 | 1.33E-02 | 2.10E-31  |
| rs539687    | A | T | 3.30E-01 | -9.61E-02 | 1.40E-02 | 6.95E-12  |
| rs2153960   | G | A | 7.12E-01 | 2.69E-01  | 1.45E-02 | 1.81E-76  |
| rs9401881   | C | T | 4.54E-01 | 3.65E-01  | 1.32E-02 | 8.79E-168 |
| rs6913063   | C | G | 6.84E-01 | -8.35E-02 | 1.42E-02 | 4.04E-09  |
| rs1112847   | C | T | 5.05E-01 | -8.95E-02 | 1.32E-02 | 1.27E-11  |
| rs1039086   | T | A | 5.59E-01 | 9.35E-02  | 1.33E-02 | 1.89E-12  |
| rs3866462   | T | A | 3.42E-01 | 1.41E-01  | 1.40E-02 | 9.33E-24  |
| rs998075    | A | G | 4.65E-01 | -1.18E-01 | 1.32E-02 | 5.73E-19  |
| rs520829    | T | G | 4.75E-01 | -1.87E-01 | 1.32E-02 | 9.97E-46  |
| rs9355548   | G | A | 6.24E-01 | -8.12E-02 | 1.37E-02 | 2.82E-09  |
| rs4709995   | C | T | 3.80E-01 | 2.23E-01  | 1.36E-02 | 1.68E-60  |
| rs10950674  | A | T | 1.70E-01 | 1.59E-01  | 1.75E-02 | 1.10E-19  |
| rs377694807 | C | T | 5.38E-01 | 9.38E-02  | 1.36E-02 | 4.65E-12  |
| rs1182174   | G | A | 2.97E-01 | 1.15E-01  | 1.44E-02 | 2.02E-15  |
| rs34495733  | G | A | 1.41E-01 | -2.57E-01 | 1.90E-02 | 8.98E-42  |
| rs112293610 | A | C | 2.92E-01 | -1.33E-01 | 1.45E-02 | 4.56E-20  |
| rs36115000  | G | T | 2.62E-01 | -1.10E-01 | 1.50E-02 | 2.08E-13  |
| rs62467361  | C | T | 5.30E-02 | 1.82E-01  | 2.96E-02 | 7.93E-10  |
| rs7785231   | A | G | 6.27E-01 | -7.96E-02 | 1.36E-02 | 5.27E-09  |
| rs6670      | T | A | 2.18E-01 | -1.03E-01 | 1.68E-02 | 9.97E-10  |
| rs2965068   | T | C | 4.56E-01 | -2.17E-01 | 1.33E-02 | 5.03E-60  |
| rs856537    | C | T | 5.49E-01 | 4.96E-01  | 1.32E-02 | 1.00E-200 |
| rs56052701  | C | T | 4.61E-01 | -1.14E-01 | 1.33E-02 | 1.07E-17  |
| rs6974707   | G | A | 2.25E-01 | 1.01E-01  | 1.58E-02 | 1.78E-10  |
| rs13232120  | A | T | 1.24E-01 | 1.87E-01  | 2.00E-02 | 7.65E-21  |
| rs411717    | T | C | 5.67E-01 | -7.81E-02 | 1.33E-02 | 4.63E-09  |
| rs35887778  | T | C | 2.61E-01 | 1.02E-01  | 1.52E-02 | 1.71E-11  |
| rs7783012   | G | A | 5.93E-01 | -1.00E-01 | 1.35E-02 | 1.08E-13  |
| rs1358394   | A | G | 5.46E-01 | 7.51E-02  | 1.33E-02 | 1.57E-08  |
| rs125124    | C | G | 3.05E-01 | 3.21E-01  | 1.44E-02 | 1.15E-110 |
| rs7457999   | T | C | 2.43E-01 | 9.22E-02  | 1.54E-02 | 2.21E-09  |
| rs273956    | A | G | 5.84E-01 | -1.08E-01 | 1.34E-02 | 6.98E-16  |
| rs68115887  | T | C | 3.58E-01 | 8.09E-02  | 1.38E-02 | 4.45E-09  |
| rs114949263 | T | C | 1.12E-01 | -1.40E-01 | 2.10E-02 | 2.59E-11  |
| rs10246481  | A | G | 3.86E-01 | 7.74E-02  | 1.36E-02 | 1.17E-08  |
| rs9657541   | C | T | 2.05E-01 | -1.04E-01 | 1.64E-02 | 2.39E-10  |
| rs142414167 | G | C | 9.62E-03 | -4.14E-01 | 7.19E-02 | 8.54E-09  |
| rs1495741   | G | A | 7.79E-01 | -1.42E-01 | 1.59E-02 | 2.62E-19  |
| rs9297994   | G | A | 6.65E-01 | -1.38E-01 | 1.39E-02 | 5.46E-23  |
| rs6471835   | A | C | 6.60E-01 | -7.63E-02 | 1.39E-02 | 4.16E-08  |
| rs1431015   | T | C | 5.98E-01 | 1.02E-01  | 1.35E-02 | 4.12E-14  |
| rs445036    | T | C | 2.88E-01 | -1.09E-01 | 1.45E-02 | 7.53E-14  |
| rs1786342   | T | C | 3.97E-01 | -9.18E-02 | 1.35E-02 | 9.91E-12  |
| rs56287691  | T | A | 2.18E-01 | -8.78E-02 | 1.60E-02 | 3.87E-08  |
| rs2737205   | T | C | 5.61E-01 | -1.31E-01 | 1.33E-02 | 7.31E-23  |
| rs62518386  | C | G | 4.46E-01 | -1.15E-01 | 1.32E-02 | 4.33E-18  |
| rs7012213   | A | T | 3.12E-01 | 1.03E-01  | 1.42E-02 | 5.12E-13  |
| rs456179    | C | T | 8.80E-01 | 2.43E-01  | 2.03E-02 | 5.52E-33  |
| rs117137578 | G | A | 1.92E-02 | -2.72E-01 | 4.82E-02 | 1.63E-08  |
| rs41303235  | C | T | 4.81E-02 | 3.11E-01  | 3.21E-02 | 3.66E-22  |
| rs10757291  | G | A | 5.32E-01 | -1.07E-01 | 1.33E-02 | 8.34E-16  |

|             |   |   |          |           |          |           |
|-------------|---|---|----------|-----------|----------|-----------|
| rs62560860  | G | A | 1.93E-01 | 1.17E-01  | 1.67E-02 | 2.67E-12  |
| rs10869022  | T | C | 7.98E-01 | 1.12E-01  | 1.66E-02 | 1.74E-11  |
| rs11788077  | A | G | 3.26E-01 | -8.25E-02 | 1.40E-02 | 4.12E-09  |
| rs72745405  | C | T | 1.76E-01 | 1.64E-01  | 1.74E-02 | 3.05E-21  |
| rs75660441  | A | G | 6.49E-02 | -2.23E-01 | 2.68E-02 | 1.01E-16  |
| rs7034716   | C | T | 2.99E-01 | -8.56E-02 | 1.44E-02 | 2.91E-09  |
| rs78509281  | C | T | 5.12E-02 | 2.89E-01  | 3.04E-02 | 2.13E-21  |
| rs3891689   | T | C | 2.37E-01 | 8.99E-02  | 1.55E-02 | 7.29E-09  |
| rs13301073  | G | A | 3.68E-01 | -1.19E-01 | 1.37E-02 | 2.34E-18  |
| rs1832007   | A | G | 1.55E-01 | 3.03E-01  | 1.82E-02 | 4.93E-62  |
| rs2801482   | A | G | 2.43E-02 | 2.51E-01  | 4.32E-02 | 6.65E-09  |
| rs10430801  | G | A | 2.97E-01 | 8.36E-02  | 1.44E-02 | 6.64E-09  |
| rs10828250  | C | G | 3.09E-01 | -1.10E-01 | 1.43E-02 | 1.37E-14  |
| rs7899156   | C | A | 6.47E-01 | 8.60E-02  | 1.38E-02 | 4.48E-10  |
| rs74218214  | C | T | 2.42E-01 | 9.14E-02  | 1.57E-02 | 5.93E-09  |
| rs10821723  | G | A | 4.24E-01 | 8.93E-02  | 1.34E-02 | 2.30E-11  |
| rs11001399  | A | C | 5.59E-01 | -8.72E-02 | 1.33E-02 | 5.85E-11  |
| rs1782652   | T | A | 3.80E-01 | 8.01E-02  | 1.37E-02 | 5.46E-09  |
| rs12219199  | C | T | 4.69E-02 | 2.22E-01  | 3.13E-02 | 1.26E-12  |
| rs2274224   | G | C | 4.32E-01 | -1.24E-01 | 1.33E-02 | 1.29E-20  |
| rs11190743  | A | G | 5.50E-01 | 1.45E-01  | 1.33E-02 | 5.06E-28  |
| rs12244388  | G | A | 3.36E-01 | -8.62E-02 | 1.39E-02 | 6.35E-10  |
| rs3858325   | C | T | 4.71E-01 | 1.03E-01  | 1.32E-02 | 6.76E-15  |
| rs11603111  | C | A | 5.45E-01 | -8.80E-02 | 1.32E-02 | 2.93E-11  |
| rs3858525   | C | G | 5.53E-01 | 8.77E-02  | 1.33E-02 | 4.06E-11  |
| rs3842763   | G | T | 2.38E-01 | -4.73E-01 | 1.57E-02 | 1.10E-199 |
| rs1037169   | T | C | 6.88E-01 | 1.06E-01  | 1.43E-02 | 9.17E-14  |
| rs11024614  | C | T | 6.29E-01 | -1.17E-01 | 1.37E-02 | 1.08E-17  |
| rs7122769   | A | T | 4.12E-01 | -8.29E-02 | 1.36E-02 | 9.66E-10  |
| rs11031051  | A | C | 3.02E-01 | -9.34E-02 | 1.45E-02 | 1.07E-10  |
| rs3136512   | C | T | 5.26E-01 | -7.74E-02 | 1.32E-02 | 5.05E-09  |
| rs7131605   | T | A | 2.63E-01 | 2.31E-01  | 1.51E-02 | 1.71E-52  |
| rs174554    | A | G | 3.45E-01 | -1.18E-01 | 1.39E-02 | 1.47E-17  |
| rs138668741 | C | T | 4.53E-02 | 2.04E-01  | 3.33E-02 | 8.37E-10  |
| rs35826789  | T | A | 8.91E-02 | 1.76E-01  | 2.33E-02 | 5.07E-14  |
| rs2512522   | G | C | 1.63E-01 | -1.22E-01 | 1.78E-02 | 6.65E-12  |
| rs76265107  | T | A | 5.51E-01 | 7.68E-02  | 1.37E-02 | 2.03E-08  |
| rs607146    | C | T | 7.21E-01 | -8.78E-02 | 1.47E-02 | 2.46E-09  |
| rs12420205  | C | T | 6.80E-01 | -9.35E-02 | 1.42E-02 | 4.33E-11  |
| rs10892564  | A | G | 3.81E-01 | 9.14E-02  | 1.35E-02 | 1.49E-11  |
| rs10892923  | G | A | 3.68E-01 | -9.36E-02 | 1.38E-02 | 1.02E-11  |
| rs7952602   | G | C | 1.35E-01 | -1.14E-01 | 1.93E-02 | 3.54E-09  |
| rs11064536  | T | C | 1.71E-01 | -9.74E-02 | 1.76E-02 | 2.95E-08  |
| rs2856321   | G | A | 6.39E-01 | -1.37E-01 | 1.37E-02 | 1.79E-23  |
| rs9738365   | C | A | 2.67E-01 | 3.10E-01  | 1.49E-02 | 1.29E-95  |
| rs1150974   | C | A | 1.09E-01 | 2.17E-01  | 2.12E-02 | 1.09E-24  |
| rs1260003   | T | C | 3.63E-01 | 1.06E-01  | 1.38E-02 | 1.82E-14  |
| rs6582485   | A | G | 5.19E-01 | -9.08E-02 | 1.32E-02 | 6.01E-12  |
| rs10876864  | G | A | 5.73E-01 | 7.58E-02  | 1.33E-02 | 1.23E-08  |
| rs78607331  | C | T | 4.52E-02 | -1.98E-01 | 3.17E-02 | 3.93E-10  |
| rs4547160   | T | G | 6.57E-01 | -9.27E-02 | 1.40E-02 | 3.24E-11  |
| rs1351394   | T | C | 5.09E-01 | 1.19E-01  | 1.32E-02 | 1.92E-19  |
| rs10858887  | C | T | 7.03E-01 | -8.10E-02 | 1.45E-02 | 2.42E-08  |
| rs2171126   | C | T | 5.07E-01 | 9.19E-02  | 1.32E-02 | 3.63E-12  |
| rs73373089  | G | C | 1.36E-01 | 1.47E-01  | 1.94E-02 | 2.93E-14  |
| rs978458    | T | C | 7.40E-01 | -4.25E-01 | 1.50E-02 | 2.09E-176 |
| rs79218426  | C | T | 3.93E-02 | 4.10E-01  | 3.39E-02 | 9.65E-34  |
| rs58899348  | A | C | 2.08E-02 | 2.81E-01  | 4.64E-02 | 1.52E-09  |

|             |   |   |          |           |          |           |
|-------------|---|---|----------|-----------|----------|-----------|
| rs2460488   | G | A | 1.72E-01 | -1.24E-01 | 1.75E-02 | 1.43E-12  |
| rs1800574   | C | T | 2.91E-02 | 8.01E-01  | 3.91E-02 | 3.35E-93  |
| rs61953394  | T | C | 9.13E-02 | -1.37E-01 | 2.29E-02 | 2.42E-09  |
| rs2762981   | G | A | 7.72E-01 | 1.07E-01  | 1.57E-02 | 9.93E-12  |
| rs76750172  | C | T | 2.40E-02 | 3.29E-01  | 4.31E-02 | 2.27E-14  |
| rs9532512   | G | A | 1.85E-01 | 2.12E-01  | 1.70E-02 | 8.52E-36  |
| rs1170187   | G | A | 8.16E-01 | 1.12E-01  | 1.71E-02 | 5.03E-11  |
| rs150869224 | C | T | 3.11E-02 | 2.09E-01  | 3.82E-02 | 4.24E-08  |
| rs1535793   | G | A | 7.35E-01 | 1.22E-01  | 1.49E-02 | 2.16E-16  |
| rs61957204  | G | A | 7.92E-02 | 1.60E-01  | 2.44E-02 | 5.53E-11  |
| rs9583151   | T | C | 4.94E-01 | 8.44E-02  | 1.32E-02 | 1.72E-10  |
| rs7323205   | T | C | 6.04E-01 | 7.93E-02  | 1.35E-02 | 4.68E-09  |
| rs6602912   | T | G | 2.83E-01 | 1.09E-01  | 1.46E-02 | 9.50E-14  |
| rs11620783  | C | T | 4.31E-01 | -9.61E-02 | 1.34E-02 | 7.13E-13  |
| rs28396553  | C | T | 5.87E-01 | 7.70E-02  | 1.35E-02 | 1.01E-08  |
| rs33912345  | C | A | 6.12E-01 | -1.33E-01 | 1.35E-02 | 6.86E-23  |
| rs36215895  | C | T | 9.48E-03 | -4.36E-01 | 6.80E-02 | 1.41E-10  |
| rs4902712   | G | A | 6.10E-01 | -7.76E-02 | 1.35E-02 | 8.83E-09  |
| rs13379043  | T | C | 2.79E-01 | -1.28E-01 | 1.50E-02 | 9.59E-18  |
| rs175043    | G | A | 4.66E-01 | -9.27E-02 | 1.32E-02 | 2.46E-12  |
| rs10142298  | C | T | 6.88E-01 | 1.13E-01  | 1.42E-02 | 1.92E-15  |
| rs876375    | A | G | 5.22E-01 | -1.28E-01 | 1.32E-02 | 4.63E-22  |
| rs1659563   | A | G | 5.29E-01 | -8.65E-02 | 1.33E-02 | 7.62E-11  |
| rs150844304 | A | C | 2.45E-02 | -8.05E-01 | 4.26E-02 | 1.50E-79  |
| rs12908960  | G | A | 4.61E-01 | -9.58E-02 | 1.33E-02 | 5.21E-13  |
| rs7178424   | C | T | 4.50E-01 | -2.07E-01 | 1.32E-02 | 5.60E-55  |
| rs117120687 | A | T | 4.64E-02 | -2.60E-01 | 3.14E-02 | 1.34E-16  |
| rs5742915   | T | C | 4.62E-01 | 1.35E-01  | 1.32E-02 | 1.23E-24  |
| rs2028388   | T | C | 3.87E-01 | 8.11E-02  | 1.36E-02 | 2.25E-09  |
| rs1994147   | T | A | 2.96E-01 | 1.31E-01  | 1.49E-02 | 1.62E-18  |
| rs8034564   | G | A | 5.83E-01 | 1.28E-01  | 1.34E-02 | 1.23E-21  |
| rs10438491  | T | C | 7.02E-01 | 1.03E-01  | 1.45E-02 | 1.41E-12  |
| rs4988483   | C | A | 5.73E-02 | -8.76E-01 | 2.90E-02 | 3.44E-200 |
| rs4786350   | C | G | 4.37E-02 | -2.16E-01 | 3.22E-02 | 1.86E-11  |
| rs576550218 | C | T | 1.29E-02 | -7.18E-01 | 5.90E-02 | 4.69E-34  |
| rs55706729  | A | G | 7.21E-02 | 4.66E-01  | 2.55E-02 | 1.03E-74  |
| rs74947370  | A | T | 9.32E-02 | -2.12E-01 | 2.29E-02 | 1.68E-20  |
| rs77510867  | C | T | 1.84E-01 | -1.56E-01 | 1.71E-02 | 1.03E-19  |
| rs13333965  | C | T | 2.55E-01 | 8.60E-02  | 1.52E-02 | 1.56E-08  |
| rs12935465  | T | C | 4.96E-01 | -9.15E-02 | 1.32E-02 | 4.05E-12  |
| rs12445535  | C | T | 4.83E-01 | -7.85E-02 | 1.32E-02 | 3.03E-09  |
| rs56226746  | G | A | 4.26E-01 | 1.02E-01  | 1.38E-02 | 1.66E-13  |
| rs3809627   | C | A | 4.01E-01 | -7.48E-02 | 1.34E-02 | 2.68E-08  |
| rs35713203  | G | C | 3.79E-01 | -1.82E-01 | 1.36E-02 | 7.13E-41  |
| rs116971887 | G | T | 4.53E-02 | -1.85E-01 | 3.21E-02 | 8.07E-09  |
| rs8055075   | C | G | 5.81E-01 | -9.18E-02 | 1.34E-02 | 6.26E-12  |
| rs112941090 | C | G | 1.67E-01 | -1.15E-01 | 1.77E-02 | 8.96E-11  |
| rs17299478  | C | T | 1.69E-01 | -1.65E-01 | 1.76E-02 | 1.03E-20  |
| rs8059803   | G | A | 7.00E-01 | 1.70E-01  | 1.44E-02 | 5.34E-32  |
| rs4888163   | G | A | 3.34E-01 | -1.24E-01 | 1.40E-02 | 1.29E-18  |
| rs4782568   | C | G | 4.53E-01 | -1.45E-01 | 1.33E-02 | 1.74E-27  |
| rs4790814   | G | A | 5.19E-01 | -8.87E-02 | 1.32E-02 | 1.68E-11  |
| rs12946467  | C | G | 3.99E-01 | -7.96E-02 | 1.34E-02 | 3.19E-09  |
| rs727428    | T | C | 5.57E-01 | 9.84E-02  | 1.33E-02 | 1.16E-13  |
| rs12952818  | G | A | 6.17E-01 | -1.22E-01 | 1.37E-02 | 4.05E-19  |
| rs3826331   | T | C | 6.02E-01 | 1.29E-01  | 1.35E-02 | 9.36E-22  |
| rs117292219 | G | T | 9.16E-02 | -1.51E-01 | 2.33E-02 | 8.77E-11  |
| rs62078793  | G | A | 1.24E-01 | 1.14E-01  | 2.01E-02 | 1.40E-08  |

|             |   |   |          |           |          |          |
|-------------|---|---|----------|-----------|----------|----------|
| rs9896243   | C | G | 2.16E-01 | 1.09E-01  | 1.60E-02 | 1.03E-11 |
| rs142039417 | A | T | 2.45E-02 | 6.73E-01  | 4.37E-02 | 1.43E-53 |
| rs11568828  | T | C | 1.17E-01 | -1.77E-01 | 2.20E-02 | 9.12E-16 |
| rs144830625 | C | T | 2.54E-02 | 3.17E-01  | 4.59E-02 | 5.17E-12 |
| rs117524772 | C | A | 2.63E-02 | 3.47E-01  | 4.11E-02 | 3.14E-17 |
| rs4789227   | C | T | 6.53E-01 | 8.59E-02  | 1.38E-02 | 5.23E-10 |
| rs12051698  | C | G | 3.53E-01 | -8.30E-02 | 1.39E-02 | 2.35E-09 |
| rs2846579   | C | T | 1.44E-01 | 1.05E-01  | 1.91E-02 | 4.43E-08 |
| rs4567812   | G | A | 3.03E-01 | 1.09E-01  | 1.44E-02 | 2.91E-14 |
| rs4468717   | C | T | 7.77E-02 | -1.49E-01 | 2.46E-02 | 1.33E-09 |
| rs34233878  | T | C | 9.81E-02 | 1.23E-01  | 2.22E-02 | 2.55E-08 |
| rs11664259  | C | T | 4.06E-01 | -8.50E-02 | 1.35E-02 | 2.78E-10 |
| rs585187    | G | T | 4.92E-01 | 7.59E-02  | 1.32E-02 | 8.38E-09 |
| rs12454712  | T | C | 3.76E-01 | -1.02E-01 | 1.36E-02 | 6.34E-14 |
| rs74327681  | C | T | 4.21E-02 | -2.97E-01 | 3.28E-02 | 1.36E-19 |
| rs1942583   | T | C | 5.26E-01 | 7.88E-02  | 1.32E-02 | 2.14E-09 |
| rs12978130  | C | T | 7.18E-01 | 8.48E-02  | 1.47E-02 | 8.73E-09 |
| rs62114286  | G | T | 3.15E-01 | -1.94E-01 | 1.42E-02 | 1.31E-42 |
| rs7256994   | G | A | 3.35E-01 | -8.82E-02 | 1.40E-02 | 3.20E-10 |
| rs8105174   | C | T | 1.88E-01 | -2.59E-01 | 1.69E-02 | 3.68E-53 |
| rs79430416  | A | T | 5.00E-01 | -1.40E-01 | 1.33E-02 | 6.53E-26 |
| rs3745683   | G | A | 7.47E-02 | 1.50E-01  | 2.51E-02 | 2.21E-09 |
| rs6510177   | T | C | 8.05E-01 | -1.21E-01 | 1.69E-02 | 8.01E-13 |
| rs74401830  | G | A | 3.31E-01 | -8.24E-02 | 1.40E-02 | 4.29E-09 |
| rs7254601   | A | G | 2.43E-01 | 8.78E-02  | 1.54E-02 | 1.26E-08 |
| rs296361    | G | A | 1.65E-01 | 1.33E-01  | 1.78E-02 | 6.60E-14 |
| rs2287921   | T | C | 5.39E-01 | -1.58E-01 | 1.32E-02 | 1.16E-32 |
| rs11672485  | T | C | 4.90E-01 | -7.88E-02 | 1.32E-02 | 2.37E-09 |
| rs12975366  | T | C | 3.96E-01 | -1.05E-01 | 1.34E-02 | 7.13E-15 |
| rs2208030   | T | C | 5.05E-01 | -9.86E-02 | 1.32E-02 | 7.30E-14 |
| rs73125628  | C | T | 2.78E-01 | -2.68E-01 | 1.47E-02 | 4.44E-74 |
| rs6132291   | C | T | 1.96E-01 | 1.03E-01  | 1.67E-02 | 6.51E-10 |
| rs6082354   | A | C | 6.67E-01 | -2.33E-01 | 1.40E-02 | 1.16E-62 |
| rs6088579   | A | G | 8.18E-01 | 1.48E-01  | 1.71E-02 | 4.64E-18 |
| rs2207132   | G | A | 3.29E-02 | -2.51E-01 | 3.69E-02 | 1.04E-11 |
| rs10485614  | A | C | 7.73E-02 | -2.20E-01 | 2.47E-02 | 4.68E-19 |
| rs2104476   | G | A | 7.33E-01 | -1.13E-01 | 1.49E-02 | 3.08E-14 |
| rs76364377  | G | A | 7.48E-02 | 1.64E-01  | 2.50E-02 | 4.85E-11 |
| rs8126001   | C | T | 4.90E-01 | 1.42E-01  | 1.32E-02 | 5.52E-27 |
| rs62229260  | G | A | 6.04E-01 | 2.06E-01  | 1.35E-02 | 7.07E-53 |
| rs9978775   | A | G | 5.69E-01 | 1.04E-01  | 1.33E-02 | 5.66E-15 |
| rs4822452   | C | T | 6.11E-01 | -1.02E-01 | 1.35E-02 | 5.67E-14 |
| rs2294239   | A | G | 4.27E-01 | -8.11E-02 | 1.34E-02 | 1.34E-09 |
| rs5755943   | G | C | 1.36E-01 | 1.49E-01  | 1.92E-02 | 1.08E-14 |
| rs6519133   | T | C | 3.94E-01 | -1.58E-01 | 1.35E-02 | 1.34E-31 |
| rs9611567   | A | G | 2.44E-01 | -1.48E-01 | 1.54E-02 | 6.43E-22 |
| rs4823324   | T | C | 4.17E-01 | -7.93E-02 | 1.35E-02 | 4.27E-09 |

---

**Supplementary Table S18: Genome-wide significant independent SNPs for testosterone**

| SNP        | effect | alle | other | alle | eaf      | beta      | se       | pval     |
|------------|--------|------|-------|------|----------|-----------|----------|----------|
| rs1989147  | C      |      | T     |      | 1.91E-01 | -2.58E-02 | 4.03E-03 | 1.60E-10 |
| rs7521867  | T      |      | C     |      | 7.87E-01 | -2.16E-02 | 3.83E-03 | 1.70E-08 |
| rs4453027  | G      |      | T     |      | 4.24E-01 | -1.87E-02 | 3.21E-03 | 5.60E-09 |
| rs1416685  | G      |      | C     |      | 4.10E-01 | -1.82E-02 | 3.20E-03 | 1.40E-08 |
| rs505237   | A      |      | G     |      | 6.16E-01 | 1.81E-02  | 3.23E-03 | 2.20E-08 |
| rs3118386  | T      |      | C     |      | 3.99E-01 | 1.81E-02  | 3.21E-03 | 1.70E-08 |
| rs6684361  | T      |      | C     |      | 3.12E-01 | 6.12E-02  | 3.41E-03 | 5.60E-72 |
| rs12143068 | A      |      | G     |      | 2.53E-01 | -2.46E-02 | 3.61E-03 | 8.70E-12 |
| rs12091273 | C      |      | T     |      | 2.05E-01 | -2.16E-02 | 3.89E-03 | 2.80E-08 |
| rs2205698  | A      |      | G     |      | 6.76E-01 | 2.14E-02  | 3.35E-03 | 1.70E-10 |
| rs2250477  | G      |      | C     |      | 2.48E-01 | 5.00E-02  | 3.64E-03 | 5.50E-43 |
| rs17558745 | C      |      | T     |      | 3.09E-01 | -2.01E-02 | 3.42E-03 | 3.90E-09 |
| rs13022088 | A      |      | G     |      | 2.76E-01 | 2.79E-02  | 3.53E-03 | 2.80E-15 |
| rs10184382 | C      |      | T     |      | 4.46E-01 | 2.02E-02  | 3.18E-03 | 2.00E-10 |
| rs11892043 | A      |      | G     |      | 2.71E-01 | -2.46E-02 | 3.53E-03 | 3.50E-12 |
| rs1260326  | T      |      | C     |      | 6.08E-01 | 2.80E-02  | 3.22E-03 | 2.80E-18 |
| rs11676745 | G      |      | C     |      | 6.61E-01 | 2.10E-02  | 3.33E-03 | 3.00E-10 |
| rs7575635  | C      |      | T     |      | 1.94E-01 | -3.24E-02 | 3.98E-03 | 3.90E-16 |
| rs2293275  | T      |      | C     |      | 5.77E-01 | -1.90E-02 | 3.20E-03 | 3.10E-09 |
| rs11683263 | T      |      | C     |      | 5.12E-01 | -1.78E-02 | 3.16E-03 | 1.80E-08 |
| rs590097   | T      |      | G     |      | 6.49E-01 | 4.75E-02  | 3.30E-03 | 5.70E-47 |
| rs11683361 | C      |      | G     |      | 8.07E-01 | 2.65E-02  | 3.99E-03 | 3.20E-11 |
| rs1453373  | G      |      | A     |      | 6.45E-01 | -1.95E-02 | 3.28E-03 | 2.50E-09 |
| rs72916919 | T      |      | G     |      | 4.97E-01 | 1.75E-02  | 3.17E-03 | 3.50E-08 |
| rs7618363  | C      |      | G     |      | 1.57E-01 | -3.05E-02 | 4.32E-03 | 1.60E-12 |
| rs62231822 | C      |      | T     |      | 9.66E-02 | -4.49E-02 | 5.34E-03 | 4.60E-17 |
| rs35169377 | A      |      | C     |      | 3.24E-01 | -1.87E-02 | 3.36E-03 | 2.80E-08 |
| rs13091026 | C      |      | T     |      | 2.52E-02 | 5.57E-02  | 1.00E-02 | 2.60E-08 |
| rs6788984  | A      |      | G     |      | 1.44E-01 | -4.08E-02 | 4.51E-03 | 1.60E-19 |
| rs7633673  | G      |      | A     |      | 4.05E-01 | -2.13E-02 | 3.20E-03 | 2.90E-11 |
| rs1918975  | C      |      | T     |      | 5.96E-01 | -2.08E-02 | 3.21E-03 | 9.10E-11 |
| rs2342307  | A      |      | G     |      | 6.15E-01 | -2.85E-02 | 3.26E-03 | 2.30E-18 |
| rs77822621 | C      |      | T     |      | 4.24E-02 | 4.47E-02  | 7.84E-03 | 1.20E-08 |
| rs28820590 | C      |      | T     |      | 6.51E-01 | 2.11E-02  | 3.86E-03 | 5.00E-08 |
| rs11249524 | T      |      | C     |      | 4.54E-01 | -2.55E-02 | 3.15E-03 | 5.90E-16 |
| rs974801   | A      |      | G     |      | 3.67E-01 | 2.33E-02  | 3.26E-03 | 8.00E-13 |
| rs4245930  | G      |      | A     |      | 6.31E-01 | -2.34E-02 | 3.25E-03 | 5.90E-13 |
| rs58282071 | A      |      | G     |      | 4.73E-02 | -5.06E-02 | 7.46E-03 | 1.10E-11 |
| rs9686661  | C      |      | T     |      | 1.99E-01 | -2.27E-02 | 3.93E-03 | 7.50E-09 |
| rs1119208  | C      |      | T     |      | 3.49E-01 | -2.60E-02 | 3.30E-03 | 3.60E-15 |
| rs784420   | A      |      | G     |      | 2.92E-01 | 2.76E-02  | 3.45E-03 | 1.30E-15 |
| rs12658172 | G      |      | C     |      | 1.57E-01 | -4.16E-02 | 4.39E-03 | 2.20E-21 |
| rs17677724 | C      |      | T     |      | 1.64E-01 | -2.52E-02 | 4.27E-03 | 3.60E-09 |
| rs246660   | C      |      | T     |      | 2.28E-01 | 2.23E-02  | 3.76E-03 | 3.00E-09 |
| rs13153019 | T      |      | C     |      | 2.50E-01 | 2.29E-02  | 3.66E-03 | 3.50E-10 |
| rs78816356 | G      |      | A     |      | 9.91E-02 | 3.34E-02  | 5.30E-03 | 3.10E-10 |
| rs2261033  | A      |      | G     |      | 4.33E-01 | 2.67E-02  | 3.16E-03 | 3.20E-17 |
| rs9273138  | G      |      | T     |      | 1.89E-01 | -2.52E-02 | 4.40E-03 | 1.10E-08 |
| rs1214759  | A      |      | G     |      | 6.79E-01 | 3.25E-02  | 3.37E-03 | 5.40E-22 |
| rs36182456 | G      |      | A     |      | 7.82E-01 | 5.19E-02  | 3.81E-03 | 2.70E-42 |
| rs17649719 | G      |      | C     |      | 3.84E-01 | -2.08E-02 | 3.23E-03 | 1.30E-10 |
| rs9399469  | T      |      | A     |      | 6.24E-01 | 2.56E-02  | 3.26E-03 | 4.00E-15 |
| rs928008   | A      |      | G     |      | 5.02E-01 | 1.76E-02  | 3.16E-03 | 2.60E-08 |
| rs2344744  | T      |      | G     |      | 4.18E-01 | 1.76E-02  | 3.18E-03 | 3.20E-08 |
| rs34060476 | A      |      | G     |      | 1.35E-01 | 4.39E-02  | 4.59E-03 | 1.20E-21 |
| rs76021834 | A      |      | G     |      | 2.92E-01 | 1.96E-02  | 3.47E-03 | 1.60E-08 |

|             |   |   |          |           |          |           |
|-------------|---|---|----------|-----------|----------|-----------|
| rs574637649 | C | T | 3.35E-02 | -3.05E-01 | 8.80E-03 | 1.00E-200 |
| rs143764008 | G | A | 4.59E-01 | -2.45E-02 | 3.79E-03 | 1.00E-10  |
| rs9642092   | C | T | 7.94E-01 | 4.32E-02  | 3.89E-03 | 1.10E-28  |
| rs55911644  | T | A | 3.60E-01 | -2.26E-02 | 3.27E-03 | 5.70E-12  |
| rs537551388 | A | T | 2.53E-01 | 2.31E-02  | 3.64E-03 | 2.20E-10  |
| rs1788174   | G | C | 3.89E-01 | -1.88E-02 | 3.22E-03 | 5.70E-09  |
| rs11774829  | T | A | 1.02E-01 | 4.66E-02  | 5.25E-03 | 7.40E-19  |
| rs1134095   | G | A | 5.54E-01 | -3.64E-02 | 3.16E-03 | 8.60E-31  |
| rs12683780  | A | C | 3.30E-01 | -2.75E-02 | 3.44E-03 | 1.30E-15  |
| rs61237993  | G | A | 1.29E-01 | 3.66E-02  | 4.69E-03 | 5.80E-15  |
| rs10981138  | G | A | 4.32E-01 | 1.75E-02  | 3.18E-03 | 3.60E-08  |
| rs10817260  | C | T | 1.89E-01 | -3.77E-02 | 4.09E-03 | 3.60E-20  |
| rs2801885   | A | G | 2.70E-01 | -2.69E-02 | 3.57E-03 | 4.90E-14  |
| rs36032941  | C | A | 2.92E-01 | -5.55E-02 | 3.49E-03 | 5.10E-57  |
| rs1171617   | G | T | 7.70E-01 | 4.13E-02  | 3.74E-03 | 2.40E-28  |
| rs10822145  | C | T | 4.78E-01 | 2.36E-02  | 3.15E-03 | 5.80E-14  |
| rs10882525  | A | T | 3.37E-01 | -1.93E-02 | 3.32E-03 | 5.70E-09  |
| rs9527      | C | T | 2.40E-01 | -3.31E-02 | 3.68E-03 | 2.70E-19  |
| rs11031005  | T | C | 1.44E-01 | 2.73E-02  | 4.50E-03 | 1.30E-09  |
| rs79586456  | G | A | 6.71E-02 | 7.36E-02  | 6.31E-03 | 1.80E-31  |
| rs7111278   | G | A | 1.81E-01 | -2.37E-02 | 4.07E-03 | 6.30E-09  |
| rs312023    | G | A | 5.26E-01 | -2.39E-02 | 3.16E-03 | 4.60E-14  |
| rs371862    | C | T | 3.07E-01 | -2.53E-02 | 3.41E-03 | 1.20E-13  |
| rs111903103 | C | T | 4.22E-02 | -4.44E-02 | 7.93E-03 | 2.20E-08  |
| rs850294    | C | T | 1.14E-01 | 4.53E-02  | 4.98E-03 | 9.90E-20  |
| rs4149056   | T | C | 1.53E-01 | 2.68E-02  | 4.37E-03 | 8.90E-10  |
| rs3730074   | C | A | 1.52E-01 | -2.47E-02 | 4.39E-03 | 1.70E-08  |
| rs629042    | G | C | 6.13E-01 | 4.58E-02  | 3.24E-03 | 2.50E-45  |
| rs17245822  | A | C | 3.74E-01 | 2.28E-02  | 3.28E-03 | 3.80E-12  |
| rs9599996   | T | G | 4.01E-01 | -1.80E-02 | 3.23E-03 | 2.70E-08  |
| rs61964100  | G | T | 3.28E-02 | -5.35E-02 | 8.88E-03 | 1.60E-09  |
| rs7342537   | A | G | 1.86E-02 | 8.72E-02  | 1.17E-02 | 9.10E-14  |
| rs1296527   | T | C | 1.43E-01 | -2.52E-02 | 4.48E-03 | 1.80E-08  |
| rs12436785  | T | C | 4.19E-01 | 2.91E-02  | 3.19E-03 | 7.20E-20  |
| rs4924415   | T | G | 3.52E-01 | 4.83E-02  | 3.30E-03 | 1.10E-48  |
| rs2304645   | G | C | 5.17E-01 | 2.28E-02  | 3.15E-03 | 4.20E-13  |
| rs7175852   | C | T | 2.50E-01 | -2.48E-02 | 3.63E-03 | 8.70E-12  |
| rs4464040   | C | T | 1.48E-01 | -4.06E-02 | 4.44E-03 | 5.90E-20  |
| rs78865787  | A | G | 3.38E-02 | -5.81E-02 | 8.69E-03 | 2.20E-11  |
| rs62037565  | C | A | 2.32E-01 | 2.10E-02  | 3.73E-03 | 1.90E-08  |
| rs67128646  | A | C | 2.53E-01 | 2.29E-02  | 3.62E-03 | 2.40E-10  |
| rs58072681  | T | C | 7.25E-02 | 8.96E-02  | 6.10E-03 | 7.60E-49  |
| rs8044524   | G | A | 6.01E-01 | -2.40E-02 | 3.22E-03 | 8.70E-14  |
| rs3933469   | G | A | 2.68E-01 | 2.56E-02  | 3.57E-03 | 7.30E-13  |
| rs10852974  | G | C | 6.21E-01 | -1.90E-02 | 3.25E-03 | 5.30E-09  |
| rs34931250  | C | T | 5.90E-02 | -4.41E-02 | 6.67E-03 | 3.90E-11  |
| rs3786432   | C | T | 7.24E-01 | 2.05E-02  | 3.52E-03 | 6.00E-09  |
| rs117327231 | C | A | 2.37E-02 | 1.45E-01  | 1.03E-02 | 1.60E-44  |
| rs76505784  | T | C | 3.25E-02 | -6.87E-02 | 9.02E-03 | 2.60E-14  |
| rs8093038   | T | C | 1.00E-01 | -4.42E-02 | 5.26E-03 | 4.40E-17  |
| rs8111359   | C | T | 9.35E-02 | -6.11E-02 | 5.47E-03 | 6.60E-29  |
| rs4804181   | C | A | 7.77E-01 | -3.43E-02 | 3.82E-03 | 2.70E-19  |
| rs11673591  | A | T | 7.46E-01 | -2.69E-02 | 3.62E-03 | 1.00E-13  |
| rs58969991  | G | A | 6.98E-02 | 3.92E-02  | 6.19E-03 | 2.40E-10  |
| rs1889236   | C | T | 2.30E-01 | -3.26E-02 | 3.74E-03 | 3.30E-18  |
| rs2142361   | C | G | 8.72E-01 | -2.79E-02 | 4.73E-03 | 3.70E-09  |
| rs6008259   | G | A | 1.78E-01 | -2.89E-02 | 4.12E-03 | 2.30E-12  |

---

**Supplementary Table S19:** Genome-wide significant independent SNPs for sex hormone-binding globulin

| SNP         | effect | alle | other | alle | eaf      | beta      | se       | pval     |
|-------------|--------|------|-------|------|----------|-----------|----------|----------|
| rs2486922   | T      | C    |       |      | 7.43E-01 | -2.31E-02 | 3.37E-03 | 8.00E-12 |
| rs10917373  | C      | T    |       |      | 7.45E-01 | 2.25E-02  | 3.40E-03 | 3.50E-11 |
| rs114165349 | G      | C    |       |      | 2.33E-02 | -1.47E-01 | 9.84E-03 | 4.10E-50 |
| rs61779331  | C      | A    |       |      | 2.28E-01 | -2.66E-02 | 3.52E-03 | 4.00E-14 |
| rs12121301  | T      | A    |       |      | 4.36E-01 | 1.88E-02  | 2.98E-03 | 2.80E-10 |
| rs17121841  | A      | G    |       |      | 7.48E-02 | 3.45E-02  | 5.61E-03 | 7.30E-10 |
| rs469721    | C      | T    |       |      | 1.97E-01 | -2.59E-02 | 3.73E-03 | 3.30E-12 |
| rs1730864   | C      | T    |       |      | 6.59E-01 | -4.25E-02 | 3.13E-03 | 6.10E-42 |
| rs36209093  | C      | T    |       |      | 6.74E-01 | -2.50E-02 | 3.50E-03 | 9.00E-13 |
| rs72696009  | T      | C    |       |      | 4.98E-01 | -1.67E-02 | 2.95E-03 | 1.40E-08 |
| rs267733    | A      | G    |       |      | 1.61E-01 | -2.73E-02 | 4.01E-03 | 9.90E-12 |
| rs35504625  | C      | G    |       |      | 4.76E-01 | 3.00E-02  | 2.95E-03 | 3.10E-24 |
| rs16864042  | G      | T    |       |      | 4.15E-01 | -1.73E-02 | 2.99E-03 | 6.90E-09 |
| rs10801178  | G      | C    |       |      | 6.90E-01 | 1.85E-02  | 3.19E-03 | 6.20E-09 |
| rs10922143  | G      | A    |       |      | 6.64E-01 | 2.41E-02  | 3.13E-03 | 1.30E-14 |
| rs9970073   | G      | A    |       |      | 3.61E-01 | 1.81E-02  | 3.08E-03 | 3.80E-09 |
| rs1223791   | G      | A    |       |      | 8.37E-01 | -2.89E-02 | 3.99E-03 | 4.30E-13 |
| rs3001032   | T      | C    |       |      | 3.19E-01 | 2.09E-02  | 3.16E-03 | 3.60E-11 |
| rs1260326   | T      | C    |       |      | 6.05E-01 | 6.38E-02  | 3.02E-03 | 3.10E-99 |
| rs6736913   | A      | G    |       |      | 9.80E-01 | -6.49E-02 | 1.04E-02 | 4.70E-10 |
| rs1014291   | G      | T    |       |      | 4.27E-01 | 1.78E-02  | 2.99E-03 | 2.50E-09 |
| rs2160348   | T      | C    |       |      | 7.35E-01 | -5.61E-02 | 3.36E-03 | 1.60E-62 |
| rs6758199   | C      | T    |       |      | 6.70E-02 | -4.54E-02 | 5.95E-03 | 2.40E-14 |
| rs12613243  | T      | C    |       |      | 6.34E-02 | -3.56E-02 | 6.06E-03 | 4.40E-09 |
| rs10184004  | C      | T    |       |      | 4.06E-01 | 3.30E-02  | 3.00E-03 | 4.00E-28 |
| rs13427019  | T      | A    |       |      | 2.37E-01 | -1.95E-02 | 3.48E-03 | 2.00E-08 |
| rs1047891   | C      | A    |       |      | 3.15E-01 | 2.56E-02  | 3.17E-03 | 5.90E-16 |
| rs13423088  | T      | A    |       |      | 3.17E-01 | 2.91E-02  | 3.17E-03 | 4.70E-20 |
| rs4518111   | A      | C    |       |      | 5.66E-01 | 2.59E-02  | 3.00E-03 | 5.90E-18 |
| rs6792725   | A      | G    |       |      | 6.91E-01 | 3.50E-02  | 3.30E-03 | 2.50E-26 |
| rs13086465  | C      | T    |       |      | 3.20E-01 | -2.78E-02 | 3.16E-03 | 1.60E-18 |
| rs2289746   | T      | C    |       |      | 6.68E-01 | 1.76E-02  | 3.15E-03 | 2.10E-08 |
| rs56298514  | A      | C    |       |      | 2.40E-01 | -1.98E-02 | 3.46E-03 | 1.10E-08 |
| rs687339    | C      | T    |       |      | 7.72E-01 | -6.84E-02 | 3.53E-03 | 1.20E-83 |
| rs62271373  | T      | A    |       |      | 6.01E-02 | -4.56E-02 | 6.34E-03 | 6.40E-13 |
| rs79287178  | G      | A    |       |      | 3.08E-02 | -5.43E-02 | 8.97E-03 | 1.40E-09 |
| rs13108218  | A      | G    |       |      | 6.15E-01 | -4.68E-02 | 3.06E-03 | 7.50E-53 |
| rs724577    | A      | C    |       |      | 7.38E-01 | -2.00E-02 | 3.36E-03 | 2.80E-09 |
| rs6531735   | G      | A    |       |      | 5.07E-01 | -1.74E-02 | 2.96E-03 | 4.30E-09 |
| rs2123885   | T      | G    |       |      | 2.35E-01 | 2.10E-02  | 3.53E-03 | 2.50E-09 |
| rs1866975   | C      | T    |       |      | 3.87E-01 | -2.23E-02 | 3.04E-03 | 2.10E-13 |
| rs13150068  | A      | G    |       |      | 4.35E-01 | -3.30E-02 | 2.98E-03 | 2.30E-28 |
| rs3960788   | T      | C    |       |      | 4.13E-01 | 1.74E-02  | 3.00E-03 | 6.80E-09 |
| rs7655064   | T      | C    |       |      | 1.25E-01 | -2.54E-02 | 4.47E-03 | 1.40E-08 |
| rs28925904  | C      | T    |       |      | 2.51E-02 | -6.22E-02 | 9.43E-03 | 4.30E-11 |
| rs2076947   | T      | C    |       |      | 7.97E-01 | -2.58E-02 | 3.74E-03 | 5.50E-12 |
| rs76610881  | A      | G    |       |      | 1.09E-01 | 4.52E-02  | 4.75E-03 | 1.90E-21 |
| rs17547712  | G      | A    |       |      | 7.86E-02 | 3.22E-02  | 5.53E-03 | 6.10E-09 |
| rs255755    | A      | G    |       |      | 2.70E-01 | -2.45E-02 | 3.35E-03 | 2.50E-13 |
| rs40270     | A      | C    |       |      | 7.73E-01 | -3.89E-02 | 3.52E-03 | 2.80E-28 |
| rs13179413  | C      | T    |       |      | 2.84E-01 | -2.28E-02 | 3.34E-03 | 8.60E-12 |
| rs34358     | G      | A    |       |      | 6.54E-01 | -2.26E-02 | 3.11E-03 | 3.90E-13 |
| rs6860245   | G      | C    |       |      | 2.48E-01 | 2.52E-02  | 3.44E-03 | 2.10E-13 |
| rs6865292   | T      | C    |       |      | 2.75E-01 | -1.87E-02 | 3.37E-03 | 2.90E-08 |
| rs2963431   | C      | T    |       |      | 2.38E-01 | -2.30E-02 | 3.48E-03 | 3.50E-11 |
| rs75479205  | A      | G    |       |      | 1.90E-01 | 2.54E-02  | 3.78E-03 | 1.70E-11 |

|             |   |   |          |           |          |           |
|-------------|---|---|----------|-----------|----------|-----------|
| rs806794    | A | G | 2.75E-01 | 2.40E-02  | 3.31E-03 | 4.30E-13  |
| rs3130500   | T | A | 7.44E-01 | -2.69E-02 | 3.38E-03 | 1.80E-15  |
| rs9766229   | A | C | 4.13E-02 | 4.34E-02  | 7.52E-03 | 8.00E-09  |
| rs6939861   | G | A | 2.62E-01 | -3.75E-02 | 3.41E-03 | 3.70E-28  |
| rs998584    | C | A | 4.84E-01 | -2.11E-02 | 2.97E-03 | 1.10E-12  |
| rs651837    | A | G | 5.91E-01 | 1.96E-02  | 3.01E-03 | 7.70E-11  |
| rs1293953   | G | C | 3.03E-01 | 2.15E-02  | 3.23E-03 | 3.20E-11  |
| rs673736    | G | A | 4.83E-01 | 3.07E-02  | 2.97E-03 | 4.40E-25  |
| rs849138    | G | A | 5.06E-01 | 1.66E-02  | 2.96E-03 | 1.90E-08  |
| rs740158    | T | C | 4.88E-01 | 1.62E-02  | 2.97E-03 | 4.50E-08  |
| rs1229498   | T | G | 7.23E-01 | -2.15E-02 | 3.36E-03 | 1.50E-10  |
| rs1688606   | G | A | 8.16E-01 | 7.43E-02  | 3.82E-03 | 2.40E-84  |
| rs10238028  | A | G | 6.77E-02 | 3.97E-02  | 5.90E-03 | 1.80E-11  |
| rs17884589  | G | A | 1.84E-01 | 3.56E-02  | 3.81E-03 | 9.00E-21  |
| rs11556924  | C | T | 3.88E-01 | 2.31E-02  | 3.04E-03 | 2.50E-14  |
| rs157935    | T | G | 3.03E-01 | 1.79E-02  | 3.23E-03 | 2.80E-08  |
| rs114949263 | T | C | 1.11E-01 | 3.04E-02  | 4.71E-03 | 1.10E-10  |
| rs9987289   | A | G | 9.08E-01 | 4.09E-02  | 5.12E-03 | 1.30E-15  |
| rs12543287  | G | C | 3.73E-01 | 2.44E-02  | 3.07E-03 | 2.10E-15  |
| rs10504255  | G | A | 6.63E-01 | 1.95E-02  | 3.14E-03 | 4.70E-10  |
| rs7822342   | A | G | 5.88E-01 | 2.39E-02  | 3.01E-03 | 1.90E-15  |
| rs150539196 | A | G | 3.56E-02 | 9.40E-02  | 8.22E-03 | 2.80E-30  |
| rs440837    | A | G | 2.07E-01 | 5.20E-02  | 3.65E-03 | 5.20E-46  |
| rs9632838   | G | A | 4.34E-01 | 1.68E-02  | 3.00E-03 | 2.10E-08  |
| rs2223054   | T | C | 5.71E-01 | -2.17E-02 | 2.99E-03 | 3.90E-13  |
| rs13273326  | A | G | 5.30E-01 | -1.93E-02 | 2.97E-03 | 8.80E-11  |
| rs1330307   | A | C | 4.86E-01 | -1.74E-02 | 2.97E-03 | 4.60E-09  |
| rs7039093   | C | G | 4.25E-01 | 1.84E-02  | 3.00E-03 | 8.20E-10  |
| rs696825    | C | T | 2.53E-01 | 4.89E-02  | 3.41E-03 | 1.20E-46  |
| rs28372209  | A | G | 5.26E-01 | -1.64E-02 | 2.97E-03 | 3.20E-08  |
| rs62565259  | C | T | 1.72E-01 | 2.30E-02  | 3.95E-03 | 5.90E-09  |
| rs62580785  | T | C | 1.79E-01 | 2.24E-02  | 3.87E-03 | 7.30E-09  |
| rs2781265   | G | C | 3.19E-01 | -1.78E-02 | 3.16E-03 | 2.00E-08  |
| rs4837794   | T | C | 6.69E-01 | -2.59E-02 | 3.16E-03 | 2.00E-16  |
| rs112086410 | G | C | 1.25E-01 | -3.02E-02 | 4.49E-03 | 1.80E-11  |
| rs34463468  | C | T | 7.79E-01 | -3.10E-02 | 3.58E-03 | 4.30E-18  |
| rs79717793  | G | A | 1.54E-01 | -4.21E-02 | 4.10E-03 | 9.50E-25  |
| rs7921378   | G | C | 4.80E-01 | -2.03E-02 | 2.96E-03 | 7.60E-12  |
| rs71508908  | C | T | 1.03E-01 | 3.10E-02  | 4.95E-03 | 3.60E-10  |
| rs7073746   | A | G | 4.73E-01 | 9.16E-02  | 2.96E-03 | 1.00E-200 |
| rs79721752  | T | C | 1.80E-01 | -2.20E-02 | 3.98E-03 | 3.40E-08  |
| rs10824744  | A | G | 1.96E-01 | -2.80E-02 | 3.72E-03 | 5.00E-14  |
| rs2068888   | G | A | 4.52E-01 | 2.37E-02  | 2.97E-03 | 1.30E-15  |
| rs11188662  | C | T | 3.29E-01 | 1.97E-02  | 3.15E-03 | 4.00E-10  |
| rs701810    | C | T | 3.24E-01 | -1.89E-02 | 3.17E-03 | 2.60E-09  |
| rs2254069   | G | A | 1.20E-01 | -3.25E-02 | 4.56E-03 | 9.50E-13  |
| rs3842763   | G | T | 2.41E-01 | 2.77E-02  | 3.50E-03 | 2.30E-15  |
| rs7947951   | A | G | 6.89E-01 | -2.80E-02 | 3.19E-03 | 1.70E-18  |
| rs11023881  | T | A | 3.89E-01 | -2.31E-02 | 3.03E-03 | 2.60E-14  |
| rs62618693  | C | T | 4.45E-02 | 4.32E-02  | 7.17E-03 | 1.70E-09  |
| rs174537    | G | T | 3.44E-01 | -2.76E-02 | 3.11E-03 | 6.30E-19  |
| rs3015966   | T | C | 3.33E-01 | -2.39E-02 | 3.14E-03 | 2.70E-14  |
| rs551243    | G | C | 4.70E-01 | -1.68E-02 | 2.97E-03 | 1.50E-08  |
| rs12805041  | C | T | 2.29E-01 | 3.29E-02  | 3.52E-03 | 9.10E-21  |
| rs10898075  | C | T | 1.69E-01 | -2.51E-02 | 3.95E-03 | 2.30E-10  |
| rs12575636  | T | G | 1.89E-01 | -2.81E-02 | 3.79E-03 | 1.30E-13  |
| rs4938637   | G | A | 7.52E-02 | 3.58E-02  | 5.61E-03 | 1.80E-10  |
| rs117233107 | G | A | 1.51E-02 | 1.11E-01  | 1.29E-02 | 7.10E-18  |

|             |   |   |          |           |          |           |
|-------------|---|---|----------|-----------|----------|-----------|
| rs11064358  | G | A | 1.36E-01 | -2.63E-02 | 4.32E-03 | 1.20E-09  |
| rs1871395   | A | G | 1.52E-01 | -5.33E-02 | 4.12E-03 | 2.60E-38  |
| rs1989390   | C | A | 8.33E-01 | -2.37E-02 | 4.03E-03 | 4.10E-09  |
| rs75130744  | G | C | 7.08E-02 | -5.31E-02 | 5.78E-03 | 4.10E-20  |
| rs80127816  | G | A | 5.20E-02 | -3.84E-02 | 6.66E-03 | 7.90E-09  |
| rs4307773   | T | C | 5.83E-01 | -2.65E-02 | 2.99E-03 | 9.30E-19  |
| rs11172134  | T | A | 2.02E-01 | 3.12E-02  | 3.68E-03 | 2.50E-17  |
| rs315125    | C | T | 7.30E-01 | 1.86E-02  | 3.33E-03 | 2.10E-08  |
| rs61934152  | T | C | 1.54E-01 | -2.43E-02 | 4.16E-03 | 5.20E-09  |
| rs117116521 | A | C | 2.08E-02 | -6.68E-02 | 1.04E-02 | 1.40E-10  |
| rs10860594  | C | T | 3.76E-01 | -2.35E-02 | 3.06E-03 | 1.50E-14  |
| rs5009837   | T | C | 7.16E-01 | -2.76E-02 | 3.27E-03 | 3.00E-17  |
| rs7298698   | T | C | 4.68E-01 | -5.60E-02 | 2.97E-03 | 2.00E-79  |
| rs7304705   | A | G | 7.85E-02 | 5.54E-02  | 5.50E-03 | 7.10E-24  |
| rs7310409   | A | G | 6.20E-01 | 2.71E-02  | 3.04E-03 | 4.60E-19  |
| rs1882491   | T | C | 3.11E-01 | 1.99E-02  | 3.19E-03 | 4.90E-10  |
| rs825453    | A | T | 6.08E-01 | -2.33E-02 | 3.03E-03 | 1.80E-14  |
| rs1239948   | A | T | 6.09E-01 | -1.93E-02 | 3.03E-03 | 2.20E-10  |
| rs9561638   | A | C | 3.51E-01 | 1.82E-02  | 3.10E-03 | 4.90E-09  |
| rs34210072  | G | A | 1.89E-01 | 2.37E-02  | 3.79E-03 | 3.60E-10  |
| rs11621792  | C | T | 4.53E-01 | -4.81E-02 | 3.00E-03 | 6.40E-58  |
| rs72683923  | T | C | 2.00E-02 | 6.73E-02  | 1.06E-02 | 1.80E-10  |
| rs2239222   | A | G | 3.50E-01 | 1.92E-02  | 3.12E-03 | 7.40E-10  |
| rs13379043  | T | C | 2.79E-01 | 2.01E-02  | 3.36E-03 | 2.10E-09  |
| rs28929474  | C | T | 1.99E-02 | 1.25E-01  | 1.06E-02 | 6.90E-32  |
| rs17580     | T | A | 4.75E-02 | 4.59E-02  | 6.96E-03 | 4.10E-11  |
| rs2498786   | C | G | 6.16E-01 | -2.27E-02 | 3.05E-03 | 9.90E-14  |
| rs8025008   | C | T | 1.59E-01 | 2.23E-02  | 4.05E-03 | 3.80E-08  |
| rs150844304 | A | C | 2.60E-02 | -8.26E-02 | 9.28E-03 | 5.60E-19  |
| rs17652767  | G | A | 1.05E-01 | -4.49E-02 | 4.82E-03 | 1.40E-20  |
| rs79391862  | A | C | 1.39E-02 | -1.48E-01 | 1.28E-02 | 6.80E-31  |
| rs621694    | A | T | 3.58E-02 | 5.17E-02  | 8.05E-03 | 1.30E-10  |
| rs28539993  | C | T | 4.24E-01 | 2.67E-02  | 2.99E-03 | 4.70E-19  |
| rs79240050  | G | A | 3.00E-02 | 5.81E-02  | 9.15E-03 | 2.20E-10  |
| rs56332871  | C | A | 2.74E-01 | 7.49E-02  | 3.33E-03 | 3.20E-112 |
| rs10083762  | C | G | 2.74E-01 | 1.95E-02  | 3.32E-03 | 4.70E-09  |
| rs11644601  | T | C | 2.99E-01 | 2.41E-02  | 3.24E-03 | 1.10E-13  |
| rs12444108  | G | A | 4.02E-01 | -1.78E-02 | 3.02E-03 | 4.00E-09  |
| rs62033400  | A | G | 3.93E-01 | -2.36E-02 | 3.03E-03 | 7.30E-15  |
| rs2925979   | T | C | 7.00E-01 | 2.54E-02  | 3.23E-03 | 4.00E-15  |
| rs7194995   | C | A | 7.69E-01 | -2.77E-02 | 3.52E-03 | 3.40E-15  |
| rs141667726 | C | T | 7.34E-03 | -5.40E-01 | 1.77E-02 | 1.00E-200 |
| rs139667716 | G | A | 2.03E-02 | 8.74E-02  | 1.13E-02 | 1.10E-14  |
| rs142046629 | C | T | 6.11E-02 | -6.78E-02 | 6.31E-03 | 6.30E-27  |
| rs141859743 | C | T | 9.57E-03 | -1.50E-01 | 1.61E-02 | 1.40E-20  |
| rs150688657 | G | A | 1.03E-01 | -1.81E-01 | 4.84E-03 | 1.00E-200 |
| rs57116414  | G | A | 3.15E-02 | -1.49E-01 | 8.43E-03 | 4.60E-70  |
| rs17881850  | G | A | 1.07E-02 | 1.39E-01  | 1.45E-02 | 9.90E-22  |
| rs17880847  | T | A | 1.32E-02 | -2.04E-01 | 1.31E-02 | 1.40E-54  |
| rs12953179  | T | C | 5.26E-02 | 8.28E-02  | 7.24E-03 | 2.50E-30  |
| rs7224815   | A | T | 4.08E-01 | -3.27E-02 | 2.99E-03 | 6.50E-28  |
| rs12943365  | C | G | 6.10E-01 | 2.16E-02  | 3.01E-03 | 7.70E-13  |
| rs9911944   | G | T | 4.88E-01 | -4.04E-02 | 2.94E-03 | 4.40E-43  |
| rs7220103   | A | G | 4.06E-02 | 6.04E-02  | 7.43E-03 | 4.30E-16  |
| rs9907478   | C | T | 8.71E-02 | 1.32E-01  | 5.19E-03 | 4.20E-142 |
| rs8178824   | C | T | 3.02E-02 | -8.16E-02 | 8.59E-03 | 2.00E-21  |
| rs72844546  | C | T | 6.53E-01 | -2.14E-02 | 3.08E-03 | 3.90E-12  |
| rs10153315  | T | C | 4.18E-01 | -1.91E-02 | 2.98E-03 | 1.30E-10  |

|             |   |   |          |           |          |          |
|-------------|---|---|----------|-----------|----------|----------|
| rs8087306   | G | C | 6.87E-01 | -1.89E-02 | 3.19E-03 | 3.10E-09 |
| rs1217569   | G | A | 2.12E-01 | -2.41E-02 | 3.67E-03 | 5.00E-11 |
| rs663640    | C | T | 2.19E-01 | -2.22E-02 | 3.58E-03 | 5.50E-10 |
| rs941408    | C | T | 2.87E-01 | 4.54E-02  | 3.27E-03 | 6.70E-44 |
| rs4804416   | T | G | 4.27E-01 | -3.62E-02 | 2.99E-03 | 9.70E-34 |
| rs202200760 | G | C | 3.93E-02 | 1.55E-01  | 8.31E-03 | 6.70E-78 |
| rs273492    | G | A | 2.56E-01 | -2.80E-02 | 3.39E-03 | 1.60E-16 |
| rs60321073  | A | G | 1.79E-01 | -2.40E-02 | 3.87E-03 | 5.10E-10 |
| rs8104606   | G | A | 6.50E-01 | 1.76E-02  | 3.10E-03 | 1.50E-08 |
| rs1350292   | C | T | 9.33E-01 | 6.40E-02  | 5.92E-03 | 2.70E-27 |
| rs75702986  | G | A | 1.86E-01 | 2.95E-02  | 3.84E-03 | 1.50E-14 |
| rs74444983  | T | C | 2.59E-01 | -2.10E-02 | 3.40E-03 | 6.90E-10 |
| rs34255979  | C | T | 1.21E-01 | 5.11E-02  | 4.55E-03 | 3.20E-29 |
| rs2618567   | G | T | 6.58E-01 | -1.94E-02 | 3.12E-03 | 5.60E-10 |
| rs67611724  | C | T | 1.54E-01 | -2.49E-02 | 4.09E-03 | 1.00E-09 |
| rs6120663   | C | A | 4.40E-01 | -1.94E-02 | 2.99E-03 | 8.10E-11 |
| rs6129802   | C | T | 2.13E-01 | 2.35E-02  | 3.61E-03 | 6.80E-11 |
| rs6073431   | C | T | 5.32E-01 | 3.28E-02  | 3.02E-03 | 2.00E-27 |
| rs55987409  | C | T | 7.22E-02 | 3.23E-02  | 5.73E-03 | 1.70E-08 |
| rs6063803   | A | G | 5.81E-01 | -1.95E-02 | 3.01E-03 | 9.60E-11 |
| rs310670    | G | C | 6.50E-01 | -1.74E-02 | 3.13E-03 | 2.90E-08 |
| rs165722    | C | T | 5.15E-01 | -1.73E-02 | 2.98E-03 | 7.10E-09 |
| rs4820091   | T | G | 1.82E-01 | 2.44E-02  | 3.86E-03 | 2.60E-10 |
| rs757869    | G | A | 7.08E-01 | -3.06E-02 | 3.26E-03 | 5.10E-21 |
| rs3747207   | G | A | 2.15E-01 | 3.56E-02  | 3.60E-03 | 5.90E-23 |

---



**Supplementary Table S20:** Screening threshold for genetic instruments for educational attainment and mediators

| <b>Variable</b>        | <b>Threshold</b> |
|------------------------|------------------|
| Educational Attainment | Pval<5e-08       |
| BMI                    | Pval<5e-08       |
| BFP                    | Pval<5e-08       |
| WHR                    | Pval<5e-08       |
| Smoke                  | Pval<5e-08       |
| SWB                    | Pval<5e-05       |
| DS                     | Pval<5e-06       |
| Major depression       | Pval<5e-08       |
| Age at first birth     | pval<5e-06       |
| Age at last live birth | Pval<5e-08       |
| Age at menopause       | Pval<5e-08       |
| SBP                    | Pval<5e-08       |
| Coffee                 | Pval<5e-08       |
| Cholesterol            | Pval<5e-08       |
| Triglyceride           | Pval<5e-08       |
| Fasting insulin        | pval<5e-06       |
| IGF1                   | pval<5e-06       |
| testosterone           | Pval<5e-08       |
| SHBG                   | Pval<5e-08       |

Supplementary TableS21: Univariable Mendelian Randomization Analyses of Educational Attainment on Gynecological Malignancies

|                             | Number of SNPs | MR Egger          |          | Weighted median |                 | Inverse variance weighted |                 | Simple mode      |          | Weighted mode     |          | Heterogen         | Pleiotropy   |
|-----------------------------|----------------|-------------------|----------|-----------------|-----------------|---------------------------|-----------------|------------------|----------|-------------------|----------|-------------------|--------------|
|                             |                | OR (95% CI)       | P-value  | OR (95% CI)     | P-value         | OR (95% CI)               | P-value         | OR (95% CI)      | P-value  | OR (95% CI)       | P-value  | city test P value | test P value |
| EC                          | 304            | 0.58(0.32-1.05)   | 7.30E-02 | 0.75(0.60-0.93) | <b>9.30E-03</b> | 0.71(0.61-0.83)           | <b>1.38E-05</b> | 0.57(0.27-1.18)  | 1.41E-01 | 0.69(0.37-1.28)   | 2.38E-01 | 0.14              | 0.47         |
| EEC                         | 304            | 0.38(0.19-0.76)   | 6.77E-03 | 0.66(0.51-0.85) | <b>2.25E-03</b> | 0.65(0.54-0.77)           | <b>1.51E-06</b> | 0.46(0.18-1.16)  | 8.35E-02 | 0.46(0.21-0.99)   | 6.10E-02 | 0.22              | 0.12         |
| NEEC                        | 303            | 3.13(0.58-16.84)  | 1.86E-01 | 1.12(0.60-2.10) | 7.22E-01        | 0.99(0.65-1.52)           | 9.74E-01        | 0.94(0.10-8.61)  | 9.56E-01 | 1.16(0.20-6.74)   | 8.64E-01 | 0.77              | 0.17         |
| OC                          | 288            | 1.16(0.67-2.03)   | 5.92E-01 | 0.87(0.72-1.05) | 1.53E-01        | 0.84(0.73-0.97)           | <b>1.65E-02</b> | 0.71(0.37-1.36)  | 3.07E-01 | 1.28(0.71-2.33)   | 3.91E-01 | 0.02              | 0.24         |
| Endometrioid ovarian cancer | 288            | 0.75(0.23-2.49)   | 6.44E-01 | 0.76(0.49-1.17) | 2.27E-01        | 0.93(0.68-1.25)           | 6.19E-01        | 0.59(0.13-2.64)  | 4.75E-01 | 0.66(0.17-2.58)   | 5.07E-01 | 0.04              | 0.73         |
| Serous ovarian cancer       | 288            | 1.16(0.61-2.22)   | 6.50E-01 | 0.81(0.65-1.02) | 7.59E-02        | 0.78(0.66-0.92)           | <b>3.43E-03</b> | 0.67(0.29-1.52)  | 3.06E-01 | 1.09(0.56-2.10)   | 7.98E-01 | 0.01              | 0.22         |
| Mucinous ovarian cancer     | 288            | 1.29(0.24-6.94)   | 7.68E-01 | 0.81(0.45-1.45) | 4.74E-01        | 0.78(0.51-1.20)           | 2.61E-01        | 0.65(0.08-5.21)  | 6.54E-01 | 0.87(0.17-4.39)   | 8.61E-01 | 0.01              | 0.55         |
| Clear cell ovarian cancer   | 288            | 2.39(0.46-12.49)  | 3.04E-01 | 1.26(0.69-2.30) | 4.62E-01        | 1.01(0.66-1.54)           | 9.66E-01        | 1.74(0.19-15.88) | 6.29E-01 | 3.03(0.37-24.69)  | 2.92E-01 | 0.05              | 0.29         |
| CC                          | 297            | 0.53(0.09-3.17)   | 4.87E-01 | 0.83(0.43-1.61) | 5.88E-01        | 0.60(0.38-0.95)           | <b>3.03E-02</b> | 1.22(0.12-12.66) | 8.68E-01 | 1.14(0.16-8.07)   | 8.88E-01 | 0.92              | 0.89         |
| Cervical squamous carcinoma | 297            | 3.53(0.1-123.13)  | 4.87E-01 | 0.59(0.15-2.26) | 4.43E-01        | 0.62(0.25-1.54)           | 3.01E-01        | 0.84(0.01-70.27) | 9.42E-01 | 0.52(0.01-28.98)  | 7.63E-01 | 0.50              | 0.32         |
| Cervical adenocarcinoma     | 297            | 3.63(0.04-365.01) | 5.84E-01 | 0.77(0.13-4.45) | 7.72E-01        | 0.53(0.16-1.75)           | 3.00E-01        | 0.44(0-121.50)   | 7.69E-01 | 3.81(0.04-339.99) | 5.52E-01 | 0.15              | 0.40         |
| CC in situ                  | 298            | 1.02(0.42-2.51)   | 9.61E-01 | 0.64(0.45-0.91) | <b>1.15E-02</b> | 0.61(0.48-0.77)           | <b>2.71E-05</b> | 0.28(0.08-0.91)  | 3.23E-02 | 0.36(0.15-0.90)   | 5.32E-02 | 0.27              | 0.24         |
| vulvar cancer               | 297            | 0.43(0.03-5.78)   | 5.21E-01 | 0.80(0.30-2.12) | 6.57E-01        | 0.72(0.37-1.41)           | 3.43E-01        | 0.17(0.00-6.74)  | 3.56E-01 | 2.66(0.12-59.74)  | 5.89E-01 | 0.14              | 0.68         |
| vulvar cancer in situ       | 297            | 1.60(0.06-44.66)  | 7.82E-01 | 0.43(0.12-1.51) | 2.02E-01        | 0.44(0.19-1.03)           | 5.95E-02        | 0.53(0.00-62.37) | 7.79E-01 | 0.14(0.00-6.41)   | 3.53E-01 | 0.62              | 0.43         |

P values that have statistical significance (&lt; 0.05) were in bold.

Supplementary TableS22: Univariable Mendelian Randomization Analyses of Educational Attainment on Mediators

|                        | Number of | MR Egger           |          | Weighted median  |                 | Inverse variance weighted |                 | Simple mode      |          | Weighted mode    |            | Heterogeneity   | Pleiotropy      |
|------------------------|-----------|--------------------|----------|------------------|-----------------|---------------------------|-----------------|------------------|----------|------------------|------------|-----------------|-----------------|
|                        |           | OR (95% CI)        | P-value  | OR (95% CI)      | P-value         | OR (95% CI)               | P-value         | OR (95% CI)      | P-value  | OR (95% CI)      | P-value    | test<br>P value | test<br>P value |
| BMI                    | 138       | 0.79(0.58-1.07)    | 1.27E-01 | 0.82(0.78-0.86)  | <b>2.07E-14</b> | 0.80(0.74-0.86)           | <b>4.65E-10</b> | 0.78(0.66-0.91)  | 5.98E-03 | 0.81(0.67-0.98)  | 2.42E-02   | 0.00            | 0.93            |
| BFP                    | 148       | 0.89(0.59-1.33)    | 5.60E-01 | 0.86(0.77-0.97)  | <b>1.53E-02</b> | 0.83(0.75-0.91)           | <b>1.31E-04</b> | 0.68(0.47-0.99)  | 4.40E-02 | 0.85(0.61-1.19)  | 2.98E-01   | 0.00            | 0.75            |
| WHR                    | 142       | 0.97(0.74-1.27)    | 8.24E-01 | 0.92(0.84-1.00)  | <b>4.82E-02</b> | 0.90(0.84-0.96)           | <b>1.30E-03</b> | 0.72(0.54-0.96)  | 1.12E-02 | 1.04(0.82-1.32)  | 7.19E-01   | 0.06            | 0.59            |
| Smoke                  | 281       | 0.86(0.63-1.18)    | 3.58E-01 | 0.75(0.68-0.82)  | <b>5.13E-10</b> | 0.70(0.65-0.76)           | <b>5.69E-18</b> | 0.75(0.54-1.05)  | 7.79E-02 | 0.78(0.59-1.03)  | 8.17E-02   | 0.00            | 0.18            |
| Alcohol                | 140       | 1.04(0.85-1.27)    | 7.04E-01 | 0.99(0.92-1.06)  | 7.05E-01        | 1.02(0.97-1.07)           | 4.72E-01        | 0.95(0.77-1.16)  | 5.96E-01 | 0.94(0.77-1.15)  | 5.11E-01   | 0.38            | 0.83            |
| SWB                    | 140       | 0.98(0.78-1.24)    | 8.88E-01 | 1.10(1.03-1.17)  | <b>5.01E-03</b> | 1.11(1.06-1.17)           | <b>5.07E-05</b> | 1.11(0.92-1.32)  | 3.10E-01 | 1.07(0.93-1.24)  | 3.68E-01   | 0.00            | 0.27            |
| DS                     | 300       | 0.94(0.79-1.13)    | 5.23E-01 | 0.85(0.80-0.89)  | <b>1.05E-08</b> | 0.81(0.77-0.84)           | <b>2.20E-21</b> | 0.90(0.75-1.07)  | 2.82E-01 | 0.88(0.76-1.01)  | 7.61E-02   | 0.00            | 0.08            |
| Major depression       | 278       | 0.85(0.63-1.14)    | 2.83E-01 | 0.78(0.73-0.84)  | <b>3.75E-11</b> | 0.78(0.73-0.85)           | <b>2.35E-10</b> | 0.65(0.51-0.84)  | 3.40E-04 | 0.67(0.53-0.84)  | 9.67E-04   | 0.00            | 0.59            |
| Age at menarche        | 242       | 0.82(0.55-1.22)    | 3.28E-01 | 0.99(0.92-1.07)  | 8.42E-01        | 0.95(0.86-1.05)           | 3.10E-01        | 1.02(0.75-1.37)  | 9.18E-01 | 1.00(0.78-1.28)  | 9.82E-01   | 0.00            | 0.45            |
| Age at first birth     | 241       | 6.29(1.51-26.23)   | 1.22E-02 | 6.33(3.71-10.81) | <b>2.41E-12</b> | 8.59(6.03-12.23)          | <b>8.06E-33</b> | 3.61(0.64-20.22) | 1.32E-01 | 3.61(0.75-17.27) | 9.10E-02   | 0.27            | 0.66            |
| Age at last live birth | 304       | 1.80(1.55-2.08)    | 8.27E-14 | 1.69(1.61-1.78)  | <b>4.3E-92</b>  | 1.70(1.64-1.77)           | <b>3.8E-173</b> | 1.52(1.27-1.81)  | 5.5E-06  | 1.75(1.49-2.04)  | 2.5858E-09 | 0.00            | 0.46            |
| Age at menopause       | 304       | 1.14(0.95-1.37)    | 1.64E-01 | 1.20(1.14-1.27)  | <b>4.60E-11</b> | 1.20(1.14-1.25)           | <b>8.93E-14</b> | 1.20(0.98-1.46)  | 9.63E-02 | 1.20(0.97-1.48)  | 1.00E-01   | 0.00            | 0.61            |
| SBP                    | 279       | 0.59(0.04-7.82)    | 6.89E-01 | 0.12(0.07-0.22)  | <b>3.02E-13</b> | 0.13(0.07-0.25)           | <b>5.55E-10</b> | 0.06(0.00-0.67)  | 1.47E-02 | 0.09(0.01-1.25)  | 7.78E-02   | 0.00            | 0.24            |
| Coffee                 | 304       | 1.12(1.03-1.23)    | 7.97E-03 | 1.10(1.07-1.13)  | <b>1.26E-13</b> | 1.10(1.08-1.13)           | <b>7.06E-19</b> | 1.12(1.02-1.22)  | 1.13E-02 | 1.09(1.01-1.17)  | 4.98E-02   | 0.00            | 0.66            |
| Cholesterol            | 305       | 1.01(0.97-1.05)    | 6.38E-01 | 1.03(1.02-1.04)  | <b>2.55E-07</b> | 1.03(1.02-1.04)           | <b>2.29E-08</b> | 1.04(1.00-1.09)  | 4.21E-02 | 1.04(1.00-1.08)  | 4.60E-02   | 0.00            | 0.33            |
| Triglyceride           | 127       | 0.93(0.68-1.26)    | 6.22E-01 | 0.87(0.79-0.97)  | <b>1.26E-02</b> | 0.86(0.80-0.93)           | <b>4.86E-05</b> | 0.92(0.68-1.23)  | 5.34E-01 | 0.89(0.69-1.16)  | 3.87E-01   | 0.12            | 0.63            |
| HDL                    | 127       | 0.95(0.68-1.32)    | 7.57E-01 | 1.10(0.98-1.23)  | 8.19E-02        | 1.08(1.00-1.17)           | 5.64E-02        | 1.17(0.86-1.58)  | 3.10E-01 | 1.12(0.84-1.49)  | 4.16E-01   | 0.01            | 0.43            |
| LDL                    | 127       | 0.88(0.62-1.24)    | 4.69E-01 | 0.93(0.82-1.04)  | 2.01E-01        | 0.92(0.85-1.00)           | 5.63E-02        | 0.91(0.65-1.25)  | 5.45E-01 | 0.92(0.70-1.20)  | 5.09E-01   | 0.08            | 0.78            |
| T2D                    | 7         | 12.82(0.90-181.95) | 1.18E-01 | 0.93(0.51-1.73)  | 8.22E-01        | 0.65(0.32-1.33)           | 2.37E-01        | 0.91(0.47-1.78)  | 7.89E-01 | 0.82(0.51-1.33)  | 5.03E-01   | 0.01            | 0.07            |
| Fasting insulin        | 123       | 1.03(0.84-1.27)    | 7.71E-01 | 0.95(0.89-1.02)  | 1.92E-01        | 0.95(0.90-0.99)           | <b>2.35E-02</b> | 0.95(0.78-1.15)  | 5.99E-01 | 0.94(0.79-1.11)  | 4.60E-01   | 0.48            | 0.40            |
| IGF1                   | 305       | 1.60(0.48-5.37)    | 4.46E-01 | 2.39(1.91-2.99)  | <b>7.13E-14</b> | 2.00(1.48-2.72)           | <b>8.84E-06</b> | 2.65(1.32-5.31)  | 1.20E-02 | 2.89(1.59-5.25)  | 1.94E-03   | 0.00            | 0.71            |
| Testosterone           | 282       | 1.03(0.86-1.24)    | 7.29E-01 | 0.95(0.90-1.00)  | <b>3.83E-02</b> | 0.94(0.89-0.98)           | <b>7.40E-03</b> | 0.97(0.82-1.14)  | 6.73E-01 | 0.96(0.83-1.10)  | 5.23E-01   | 0.00            | 0.29            |
| SHBG                   | 282       | 1.22(0.94-1.59)    | 1.44E-01 | 1.16(1.10-1.22)  | <b>1.86E-09</b> | 1.19(1.11-1.28)           | <b>4.03E-07</b> | 1.30(1.05-1.60)  | 1.46E-02 | 1.32(1.06-1.64)  | 1.32E-02   | 0.00            | 0.86            |
| Estradiol              | 282       | 0.90(0.71-1.14)    | 3.90E-01 | 1.00(0.91-1.09)  | 9.41E-01        | 1.02(0.96-1.08)           | 4.95E-01        | 1.02(0.76-1.38)  | 8.78E-01 | 0.99(0.75-1.31)  | 9.39E-01   | 0.45            | 0.29            |

P values that have statistical significance (&lt; 0.05) were in bold.

Supplementary TableS23. Univariable Mendelian Randomization Analyses of Mediators on Overall Endometrial Cancer

|                        | Number of SNPs | MR Egger           |                 | Weighted median |                 | Inverse variance weighted |                 | Simple mode      | Weighted mode   |                  | Heterogeneity   | Pleiotropy     |                |
|------------------------|----------------|--------------------|-----------------|-----------------|-----------------|---------------------------|-----------------|------------------|-----------------|------------------|-----------------|----------------|----------------|
|                        |                | OR (95% CI)        | P-value         | OR (95% CI)     | P-value         | OR (95% CI)               | P-value         | OR (95% CI)      | P-value         | OR (95% CI)      | P-value         | y test P value | y test P value |
| BMI                    | 450            | 2.24(1.65-3.05)    | <b>4.33E-07</b> | 1.85(1.58-2.18) | <b>1.44E-13</b> | 1.89(1.69-2.11)           | <b>9.42E-30</b> | 2.80(1.65-4.74)  | <b>6.48E-05</b> | 1.44(1.00-2.09)  | <b>2.92E-02</b> | 0.00           | 0.25           |
| BFP                    | 10             | 3.59(0.66-19.47)   | <b>1.77E-01</b> | 2.16(1.42-3.28) | <b>5.93E-04</b> | 2.11(1.48-3.00)           | <b>3.60E-05</b> | 1.62(0.83-3.18)  | 2.33E-01        | 2.04(1.10-3.75)  | 5.29E-02        | 0.16           | 0.54           |
| WHR                    | 36             | 5.76(1.55-21.48)   | <b>1.34E-02</b> | 1.04(0.77-1.42) | 7.87E-01        | 0.96(0.72-1.30)           | 8.12E-01        | 0.91(0.50-1.67)  | 7.65E-01        | 1.06(0.66-1.70)  | 8.21E-01        | 0.00           | 0.01           |
| Smoke                  | 22             | 1.11(0.86-1.44)    | 4.34E-01        | 1.00(0.85-1.18) | 9.64E-01        | 0.99(0.85-1.15)           | 9.12E-01        | 1.10(0.79-1.53)  | 5.80E-01        | 1.03(0.88-1.20)  | 7.58E-01        | 0.03           | 0.31           |
| SWB                    | 81             | 11.18(1.09-114.73) | 4.56E-02        | 1.27(0.49-3.3)  | 6.37E-01        | 1.37(0.69-2.72)           | 3.75E-01        | 1.9(0.19-18.73)  | 5.84E-01        | 1.74(0.19-15.75) | 6.30E-01        | 0.54           | 0.07           |
| DS                     | 23             | 1.21(0.34-4.25)    | 7.72E-01        | 1.23(0.75-2.02) | 3.92E-01        | 1.13(0.80-1.60)           | 4.83E-01        | 0.75(0.30-1.87)  | 5.43E-01        | 1.66(0.70-3.93)  | 2.64E-01        | 0.36           | 0.92           |
| Major depression       | 48             | 3.56(1.38-9.17)    | <b>1.15E-02</b> | 1.11(0.88-1.41) | 3.86E-01        | 1.04(0.87-1.26)           | 6.58E-01        | 1.38(0.77-2.48)  | 2.68E-01        | 1.37(0.76-2.45)  | 2.49E-01        | 0.07           | 0.01           |
| Age at first birth     | 7              | 0.95(0.74-1.22)    | 7.01E-01        | 1.06(0.97-1.16) | 2.08E-01        | 1.03(0.96-1.11)           | 3.67E-01        | 1.06(0.93-1.21)  | 3.96E-01        | 1.06(0.93-1.21)  | 4.09E-01        | 0.91           | 0.52           |
| Age at last live birth | 5              | 4.53(0.10-197.64)  | 4.90E-01        | 1.07(0.51-2.24) | 8.58E-01        | 1.05(0.57-1.95)           | 8.81E-01        | 1.03(0.39-2.73)  | 9.51E-01        | 1.18(0.49-2.84)  | 7.51E-01        | 0.96           | 0.50           |
| Age at menopause       | 107            | 1.45(1.16-1.81)    | <b>1.50E-03</b> | 1.34(1.15-1.57) | <b>1.90E-04</b> | 1.23(1.10-1.38)           | <b>2.23E-04</b> | 1.39(0.96-2.01)  | 5.96E-02        | 1.38(1.14-1.67)  | <b>5.82E-04</b> | 0.00           | 0.10           |
| SBP                    | 438            | 0.99(0.98-1.01)    | 4.94E-01        | 1.00(0.99-1.01) | 7.15E-01        | 1.00(0.99-1.01)           | 6.75E-01        | 1.01(0.99-1.04)  | 3.84E-01        | 1(0.98-1.01)     | 7.74E-01        | 0.00           | 0.35           |
| Coffee                 | 38             | 1.25(0.50-3.13)    | 6.32E-01        | 1.57(0.85-2.89) | 1.47E-01        | 1.31(0.84-2.05)           | 2.37E-01        | 1.80(0.46-7.02)  | 3.84E-01        | 1.35(0.67-2.73)  | 3.97E-01        | 0.01           | 0.91           |
| Cholesterol            | 50             | 1.90(0.50-7.25)    | 3.54E-01        | 1.34(0.53-3.38) | 5.22E-01        | 1.36(0.67-2.76)           | 3.99E-01        | 2.26(0.34-14.98) | 3.77E-01        | 2.51(0.64-9.77)  | 1.71E-01        | 0.00           | 0.57           |
| Triglyceride           | 56             | 0.82(0.67-0.99)    | <b>4.06E-02</b> | 0.89(0.76-1.03) | 1.16E-01        | 0.93(0.83-1.05)           | 2.27E-01        | 0.99(0.77-1.29)  | 9.55E-01        | 0.89(0.78-1.02)  | 7.84E-02        | 0.01           | 0.09           |
| Fasting insulin        | 11             | 0.32(0.03-3.12)    | 3.50E-01        | 1.13(0.53-2.42) | 7.54E-01        | 2.07(1.13-3.83)           | <b>1.94E-02</b> | 0.98(0.26-3.63)  | 9.74E-01        | 0.95(0.29-3.10)  | 9.32E-01        | 0.22           | 0.13           |
| IGF1                   | 320            | 1.00(0.97-1.04)    | 8.19E-01        | 0.99(0.97-1.01) | 3.62E-01        | 1.00(0.98-1.01)           | 5.82E-01        | 0.94(0.88-1.00)  | 4.04E-02        | 0.99(0.95-1.02)  | 3.80E-01        | 0.00           | 0.56           |
| testosterone           | 112            | 1.85(1.39-2.46)    | <b>4.79E-05</b> | 1.56(1.30-1.87) | <b>1.80E-06</b> | 1.58(1.38-1.82)           | <b>1.22E-10</b> | 1.52(0.92-2.52)  | 1.02E-01        | 1.79(1.42-2.25)  | <b>1.06E-05</b> | 0.00           | 0.22           |
| SHBG                   | 190            | 0.87(0.73-1.04)    | 1.17E-01        | 0.87(0.76-0.99) | <b>3.09E-02</b> | 0.83(0.75-0.91)           | <b>8.84E-05</b> | 0.91(0.68-1.23)  | 5.39E-01        | 0.85(0.72-1.00)  | 5.51E-02        | 0.00           | 0.55           |

P values that have statistical significance (&lt; 0.05) were in bold.

Supplementary TableS24. Univariable Mendelian Randomization Analyses of Mediators on Overall Ovarian Cancer

|                        | Number<br>of SNPs | MR Egger         |          | Weighted median |                 | Inverse variance weighted |                 | Simple mode     |          | Weighted mode   |                 | Heterogeneity test | Pleiotropy test |
|------------------------|-------------------|------------------|----------|-----------------|-----------------|---------------------------|-----------------|-----------------|----------|-----------------|-----------------|--------------------|-----------------|
|                        |                   | OR (95% CI)      | P-value  | OR (95% CI)     | P-value         | OR (95% CI)               | P-value         | OR (95% CI)     | P-value  | OR (95% CI)     | P-value         | P value            | P value         |
| BMI                    | 429               | 1.27(0.96-1.68)  | 1.01E-01 | 1.09(0.94-1.26) | 2.49E-01        | 1.12(1.02-1.24)           | <b>2.27E-02</b> | 0.78(0.49-1.25) | 3.02E-01 | 1.06(0.79-1.42) | 7.09E-01        | 0.00               | 0.38            |
| BFP                    | 10                | 1.61(0.50-5.22)  | 4.52E-01 | 1.20(0.85-1.69) | 2.95E-01        | 1.13(0.87-1.46)           | 3.52E-01        | 1.21(0.66-2.19) | 5.65E-01 | 1.40(0.84-2.34) | 2.16E-01        | 0.57               | 0.56            |
| WHR                    | 33                | 0.69(0.30-1.58)  | 3.87E-01 | 0.96(0.74-1.25) | 7.72E-01        | 0.99(0.82-1.18)           | 8.82E-01        | 0.76(0.41-1.41) | 3.53E-01 | 0.74(0.42-1.30) | 3.38E-01        | 0.55               | 0.39            |
| Smoke                  | 22                | 1.19(1.00-1.42)  | 6.22E-02 | 1.09(0.96-1.25) | 2.13E-01        | 0.98(0.88-1.09)           | 6.88E-01        | 0.77(0.56-1.05) | 1.05E-01 | 1.10(0.97-1.26) | 1.72E-01        | 0.34               | 0.01            |
| SWB                    | 74                | 1.44(0.66-3.15)  | 3.59E-01 | 1.39(1.02-1.90) | 3.89E-02        | 1.13(0.90-1.43)           | 2.95E-01        | 1.78(0.73-4.30) | 1.47E-01 | 1.78(0.84-3.78) | 1.58E-01        | 0.17               | 0.52            |
| DS                     | 21                | 0.98(0.28-3.43)  | 9.78E-01 | 1.13(0.71-1.81) | 5.91E-01        | 1.03(0.72-1.47)           | 8.68E-01        | 1.43(0.61-3.33) | 4.37E-01 | 1.38(0.65-2.92) | 4.59E-01        | 0.15               | 0.94            |
| Major depression       | 47                | 1.04(0.47-2.32)  | 9.23E-01 | 1.12(0.91-1.38) | 2.77E-01        | 1.08(0.93-1.25)           | 3.18E-01        | 1.38(0.88-2.15) | 2.09E-01 | 1.36(0.84-2.19) | 2.06E-01        | 0.37               | 0.93            |
| Age at first birth     | 7                 | 0.96(0.69-1.32)  | 7.95E-01 | 1.11(1.01-1.21) | <b>2.32E-02</b> | 1.06(0.97-1.16)           | 1.67E-01        | 1.13(0.95-1.33) | 2.04E-01 | 1.12(0.95-1.32) | 2.08E-01        | 0.05               | 0.53            |
| Age at last live birth | 6                 | 1.35(0.17-10.94) | 7.95E-01 | 1.50(0.77-2.95) | 2.01E-01        | 1.53(0.91-2.57)           | 1.05E-01        | 1.78(0.61-5.23) | 3.18E-01 | 1.11(0.52-2.34) | 8.11E-01        | 0.39               | 0.91            |
| Age at menopause       | 104               | 1.16(0.94-1.42)  | 1.67E-01 | 1.14(1.00-1.30) | 5.15E-02        | 1.12(1.02-1.24)           | <b>1.63E-02</b> | 1.10(0.81-1.49) | 5.61E-01 | 1.17(1.02-1.35) | <b>2.33E-02</b> | 0.00               | 0.76            |
| SBP                    | 417               | 0.99(0.98-1.01)  | 1.98E-01 | 1.00(0.99-1.00) | 4.30E-01        | 1.00(0.99-1.01)           | 8.97E-01        | 0.99(0.97-1.02) | 6.27E-01 | 1.00(0.98-1.02) | 7.70E-01        | 0.00               | 0.18            |
| Coffee                 | 36                | 1.31(0.56-3.09)  | 5.34E-01 | 1.30(0.83-2.05) | 2.79E-01        | 0.97(0.63-1.48)           | 8.74E-01        | 1.45(0.58-3.63) | 4.46E-01 | 1.19(0.69-2.06) | 5.08E-01        | 0.00               | 0.42            |
| Cholesterol            | 49                | 1.14(0.30-4.30)  | 8.47E-01 | 0.92(0.46-1.84) | 8.22E-01        | 0.74(0.36-1.49)           | 3.94E-01        | 0.87(0.28-2.71) | 8.03E-01 | 0.96(0.46-1.97) | 8.98E-01        | 0.00               | 0.45            |
| Triglyceride           | 54                | 0.98(0.82-1.17)  | 8.26E-01 | 0.95(0.84-1.08) | 4.48E-01        | 1.02(0.92-1.13)           | 7.67E-01        | 1.05(0.81-1.35) | 7.19E-01 | 0.97(0.86-1.10) | 6.63E-01        | 0.01               | 0.62            |
| Fasting insulin        | 11                | 1.29(0.12-13.84) | 8.40E-01 | 1.18(0.61-2.26) | 6.35E-01        | 1.27(0.74-2.20)           | 3.89E-01        | 0.72(0.24-2.19) | 5.83E-01 | 0.71(0.23-2.17) | 5.65E-01        | 0.20               | 0.99            |
| IGF1                   | 302               | 1.02(0.99-1.05)  | 2.19E-01 | 1.00(0.98-1.02) | 9.37E-01        | 0.99(0.98-1.01)           | 2.92E-01        | 0.99(0.95-1.05) | 8.21E-01 | 1.00(0.97-1.03) | 9.18E-01        | 0.00               | 0.05            |
| testosterone           | 106               | 0.88(0.66-1.16)  | 3.56E-01 | 0.93(0.80-1.08) | 3.66E-01        | 0.91(0.81-1.01)           | 7.21E-02        | 0.89(0.62-1.27) | 5.54E-01 | 1.05(0.74-1.49) | 7.69E-01        | 0.15               | 0.80            |
| SHBG                   | 173               | 0.97(0.86-1.10)  | 6.72E-01 | 1.06(0.94-1.19) | 3.39E-01        | 1.02(0.95-1.10)           | 5.17E-01        | 1.03(0.82-1.29) | 8.19E-01 | 1.02(0.90-1.15) | 7.89E-01        | 0.21               | 0.33            |

P values that have statistical significance (&lt; 0.05) were in bold.

Supplementary TableS25. Univariable Mendelian Randomization Analyses of Mediators on Overall Cervical Cancer

|                        |           | MR Egger         |          | Weighted median  |          | Inverse variance weighted |          | Simple mode      |          | Weighted mode    |          | Heterogeneity test | Pleiotropy test |
|------------------------|-----------|------------------|----------|------------------|----------|---------------------------|----------|------------------|----------|------------------|----------|--------------------|-----------------|
|                        | Number of | OR (95% CI)      | P-value  | OR (95% CI)      | P-value  | OR (95% CI)               | P-value  | OR (95% CI)      | P-value  | OR (95% CI)      | P-value  | P value            | P value         |
| BMI                    | 445       | 1.30(0.50-3.40)  | 5.94E-01 | 1.32(0.79-2.22)  | 2.98E-01 | 1.23(0.88-1.73)           | 2.26E-01 | 2.68(0.57-12.57) | 2.33E-01 | 2.28(0.79-6.62)  | 1.46E-01 | 0.02               | 0.91            |
| BFP                    | 10        | 0.01(0.00-0.74)  | 6.92E-02 | 0.84(0.24-2.94)  | 7.82E-01 | 1.19(0.47-3.02)           | 7.07E-01 | 4.09(0.40-41.88) | 2.74E-01 | 0.40(0.08-1.92)  | 3.16E-01 | 0.59               | 0.06            |
| WHR                    | 36        | 1.57(0.08-29.99) | 7.67E-01 | 0.93(0.39-2.22)  | 8.75E-01 | 0.78(0.42-1.45)           | 4.34E-01 | 0.85(0.14-5.02)  | 8.63E-01 | 0.87(0.11-6.90)  | 8.91E-01 | 0.80               | 0.64            |
| Smoke                  | 22        | 1.10(0.59-2.07)  | 7.70E-01 | 1.13(0.70-1.83)  | 6.27E-01 | 1.13(0.79-1.62)           | 5.16E-01 | 1.55(0.67-3.61)  | 3.33E-01 | 1.14(0.70-1.87)  | 5.85E-01 | 0.65               | 0.93            |
| SWB                    | 79        | 1.18(0.09-15.66) | 9.00E-01 | 1.74(0.59-5.11)  | 3.12E-01 | 1.08(0.51-2.28)           | 8.34E-01 | 4.35(0.31-61.41) | 2.56E-01 | 3.51(0.31-39.72) | 3.08E-01 | 0.82               | 0.95            |
| DS                     | 23        | 0.12(0.00-5.86)  | 2.95E-01 | 0.36(0.08-1.60)  | 1.82E-01 | 0.40(0.14-1.17)           | 9.47E-02 | 0.24(0.01-4.86)  | 3.16E-01 | 0.40(0.03-5.41)  | 5.25E-01 | 0.60               | 0.53            |
| Major depression       | 47        | 0.80(0.04-17.49) | 8.86E-01 | 1.19(0.56-2.54)  | 6.51E-01 | 0.96(0.57-1.63)           | 8.89E-01 | 0.34(0.05-2.55)  | 2.90E-01 | 1.65(0.21-12.78) | 6.10E-01 | 0.56               | 0.90            |
| Age at first birth     | 7         | 1.24(0.45-3.41)  | 6.90E-01 | 1.03(0.77-1.37)  | 8.67E-01 | 1.04(0.82-1.32)           | 7.42E-01 | 0.96(0.64-1.44)  | 8.61E-01 | 1.06(0.72-1.56)  | 8.01E-01 | 0.88               | 0.74            |
| Age at last live birth | 6         | 1.88(0.90-16.94) | 8.91E-01 | 0.71(0.06-8.15)  | 7.86E-01 | 2.88(0.39-21.29)          | 3.00E-01 | 0.64(0.01-31.97) | 8.32E-01 | 0.69(0.03-14.36) | 8.30E-01 | 0.55               | 0.92            |
| Age at menopause       | 107       | 1.08(0.57-2.05)  | 8.12E-01 | 0.77(0.50-1.19)  | 2.30E-01 | 0.85(0.64-1.13)           | 2.63E-01 | 0.82(0.31-2.18)  | 6.76E-01 | 0.80(0.41-1.54)  | 5.29E-01 | 0.19               | 0.41            |
| SBP                    | 430       | 0.99(0.94-1.03)  | 5.99E-01 | 1.00(0.97-1.02)  | 7.38E-01 | 0.99(0.97-1.01)           | 4.25E-01 | 1.00(0.92-1.09)  | 9.40E-01 | 1.01(0.94-1.08)  | 7.57E-01 | 0.07               | 0.82            |
| Coffee                 | 38        | 0.83(0.08-9.01)  | 8.81E-01 | 0.64(0.10-4.09)  | 6.40E-01 | 0.48(0.15-1.55)           | 2.17E-01 | 2.94(0.14-63.33) | 5.65E-01 | 1.25(0.20-7.67)  | 8.21E-01 | 0.29               | 0.60            |
| cholesterol            | 49        | 1.98(0.08-49.54) | 6.80E-01 | 2.54(0.20-31.50) | 4.84E-01 | 4.66(0.81-26.70)          | 8.39E-02 | 0.22(0.00-23.34) | 5.35E-01 | 3.35(0.11-97.96) | 5.23E-01 | 0.25               | 0.54            |
| Triglyceride           | 55        | 1.48(0.85-2.58)  | 1.68E-01 | 1.57(1.00-2.46)  | 5.93E-02 | 1.33(0.95-1.85)           | 9.69E-02 | 1.53(0.74-3.15)  | 2.85E-01 | 1.66(1.09-2.54)  | 1.95E-02 | 0.15               | 0.62            |
| Fasting insulin        | 12        | 0.01(0.00-64.66) | 3.47E-01 | 0.30(0.03-3.01)  | 3.05E-01 | 0.58(0.08-4.16)           | 5.88E-01 | 0.08(0.00-9.85)  | 2.43E-01 | 0.09(0.00-3.94)  | 2.00E-01 | 0.11               | 0.40            |
| IGF1                   | 305       | 1.08(0.99-1.18)  | 1.01E-01 | 1.04(0.97-1.12)  | 2.78E-01 | 1.02(0.98-1.07)           | 3.07E-01 | 0.95(0.79-1.15)  | 6.08E-01 | 0.99(0.88-1.12)  | 9.16E-01 | 0.13               | 0.18            |
| testosterone           | 101       | 0.85(0.46-1.57)  | 5.99E-01 | 0.90(0.53-1.53)  | 6.91E-01 | 1.06(0.74-1.52)           | 7.64E-01 | 4.06(1.03-15.98) | 5.28E-02 | 0.93(0.55-1.55)  | 7.66E-01 | 0.01               | 0.39            |
| SHBG                   | 187       | 1.24(0.77-1.99)  | 3.70E-01 | 1.03(0.69-1.53)  | 9.01E-01 | 1.01(0.79-1.31)           | 9.14E-01 | 0.61(0.25-1.52)  | 3.01E-01 | 1.04(0.63-1.74)  | 8.67E-01 | 0.18               | 0.32            |
